# Supplementary material for: Essential Nutrients and White Matter Hyperintensities: A Two-Sample Mendelian Randomization Study
Source: MDPI journal article supplement (doi:10.3390/biomedicines12040810), 2024-04-06
Supplement: s1 [file s1]

## Supplementary Material

### Essential Nutrients and White Matter Hyperintensities: A Two-Sample Mendelian Randomization Study

#### 1. Supplementary Table

**Table S1.** Characteristics of instrumental variables (IVs)

| SNP         | A1 | A2 | A1FREQ   | BETA      | SE       | P value     | Traits | N      |
|-------------|----|----|----------|-----------|----------|-------------|--------|--------|
| rs1047891   | A  | C  | 0.316449 | -0.014168 | 0.002088 | 1.16E-11    | 25OHD  | 443734 |
| rs10500209  | C  | T  | 0.282129 | -0.013417 | 0.002169 | 6.18E-10    | 25OHD  | 443734 |
| rs1065853   | T  | G  | 0.082083 | 0.027397  | 0.00367  | 8.32E-14    | 25OHD  | 443734 |
| rs10818769  | G  | C  | 0.856966 | -0.016972 | 0.00287  | 3.35E-09    | 25OHD  | 443734 |
| rs10832218  | C  | T  | 0.19774  | -0.034215 | 0.002912 | 7.09E-32    | 25OHD  | 443734 |
| rs10832289  | T  | A  | 0.410173 | -0.068522 | 0.001965 | 2.03E-266   | 25OHD  | 443734 |
| rs10859995  | C  | T  | 0.581322 | -0.039396 | 0.001971 | 7.03E-89    | 25OHD  | 443734 |
| rs10887718  | T  | C  | 0.527362 | -0.012476 | 0.001946 | 1.44E-10    | 25OHD  | 443734 |
| rs11127048  | A  | G  | 0.616569 | 0.018107  | 0.002038 | 6.41E-19    | 25OHD  | 443734 |
| rs111529171 | C  | G  | 0.216376 | -0.015488 | 0.002369 | 6.24E-11    | 25OHD  | 443734 |
| rs112285002 | T  | C  | 0.159529 | 0.060321  | 0.002701 | 1.77E-110   | 25OHD  | 443734 |
| rs11264360  | A  | T  | 0.24292  | 0.018008  | 0.002286 | 3.34E-15    | 25OHD  | 443734 |
| rs1149605   | C  | T  | 0.171453 | 0.01928   | 0.002577 | 7.34E-14    | 25OHD  | 443734 |
| rs115045402 | A  | G  | 0.026334 | 0.10713   | 0.006843 | 3.05E-55    | 25OHD  | 443734 |
| rs11723621  | G  | A  | 0.291123 | -0.18693  | 0.002121 | 2.903E-1689 | 25OHD  | 443734 |
| rs117576073 | T  | G  | 0.012385 | -0.114573 | 0.008813 | 1.22E-38    | 25OHD  | 443734 |
| rs117913124 | A  | G  | 0.027583 | -0.354126 | 0.005937 | 1.653E-775  | 25OHD  | 443734 |
| rs12123821  | T  | C  | 0.04793  | 0.074472  | 0.004583 | 2.25E-59    | 25OHD  | 443734 |
| rs1229984   | C  | T  | 0.973099 | -0.046854 | 0.006481 | 4.85E-13    | 25OHD  | 443734 |
| rs12317268  | G  | A  | 0.151589 | -0.018528 | 0.002717 | 9.15E-12    | 25OHD  | 443734 |
| rs12803256  | G  | A  | 0.770616 | 0.100325  | 0.002325 | 8.599E-407  | 25OHD  | 443734 |
| rs12997242  | A  | G  | 0.437687 | -0.012512 | 0.001972 | 2.23E-10    | 25OHD  | 443734 |
| rs144613541 | G  | A  | 0.290985 | 0.015413  | 0.002244 | 6.49E-12    | 25OHD  | 443734 |
| rs145432346 | C  | T  | 0.825873 | 0.108617  | 0.003006 | 6.78E-286   | 25OHD  | 443734 |
| rs157595    | G  | A  | 0.614127 | -0.015581 | 0.00205  | 2.95E-14    | 25OHD  | 443734 |
| rs17765311  | C  | A  | 0.344611 | -0.01515  | 0.002047 | 1.35E-13    | 25OHD  | 443734 |
| rs1800588   | T  | C  | 0.21461  | -0.029769 | 0.002366 | 2.65E-36    | 25OHD  | 443734 |
| rs1800775   | A  | C  | 0.486317 | -0.016619 | 0.00195  | 1.56E-17    | 25OHD  | 443734 |
| rs1858889   | C  | A  | 0.50084  | 0.012836  | 0.001942 | 3.85E-11    | 25OHD  | 443734 |
| rs186881826 | A  | T  | 0.223069 | 0.045907  | 0.002469 | 3.64E-77    | 25OHD  | 443734 |
| rs187443664 | T  | G  | 0.98867  | -0.106498 | 0.013059 | 3.49E-16    | 25OHD  | 443734 |
| rs188480917 | G  | C  | 0.010804 | -0.343291 | 0.009688 | 5.00E-275   | 25OHD  | 443734 |
| rs191379475 | G  | A  | 0.98893  | -0.102767 | 0.012908 | 1.70E-15    | 25OHD  | 443734 |
| rs1972994   | T  | A  | 0.64702  | -0.017509 | 0.002036 | 7.99E-18    | 25OHD  | 443734 |
| rs200641845 | T  | A  | 0.545188 | 0.017645  | 0.002356 | 6.92E-14    | 25OHD  | 443734 |
| rs2011425   | G  | T  | 0.07939  | -0.046356 | 0.00361  | 9.66E-38    | 25OHD  | 443734 |
| rs201501563 | T  | C  | 0.122197 | -0.066474 | 0.003851 | 9.17E-67    | 25OHD  | 443734 |
| rs201561609 | T  | C  | 0.986941 | -0.129276 | 0.011811 | 6.99E-28    | 25OHD  | 443734 |
| rs2037511   | A  | G  | 0.165391 | 0.016025  | 0.002618 | 9.29E-10    | 25OHD  | 443734 |
| rs2074735   | C  | G  | 0.064197 | 0.027256  | 0.003969 | 6.55E-12    | 25OHD  | 443734 |
| rs222026    | T  | A  | 0.870776 | -0.052159 | 0.002996 | 6.98E-68    | 25OHD  | 443734 |
| rs2229742   | C  | G  | 0.103928 | -0.025738 | 0.00319  | 7.13E-16    | 25OHD  | 443734 |
| rs2585442   | G  | C  | 0.246306 | 0.033609  | 0.002287 | 6.87E-49    | 25OHD  | 443734 |
| rs261291    | C  | T  | 0.35583  | -0.022414 | 0.002033 | 2.89E-28    | 25OHD  | 443734 |
| rs2762942   | A  | G  | 0.942083 | 0.053192  | 0.004321 | 7.99E-35    | 25OHD  | 443734 |
| rs28364331  | G  | A  | 0.018845 | 0.061386  | 0.007186 | 1.31E-17    | 25OHD  | 443734 |
| rs2847500   | A  | G  | 0.124391 | -0.021129 | 0.002949 | 7.79E-13    | 25OHD  | 443734 |
| rs2909218   | T  | C  | 0.792744 | 0.016894  | 0.002418 | 2.81E-12    | 25OHD  | 443734 |
| rs2934744   | A  | C  | 0.643546 | -0.022405 | 0.002119 | 3.96E-26    | 25OHD  | 443734 |

|             |   |   |          |           |          |            |                          |        |
|-------------|---|---|----------|-----------|----------|------------|--------------------------|--------|
| rs34726834  | T | C | 0.253615 | 0.013824  | 0.002239 | 6.65E-10   | 25OHD                    | 443734 |
| rs3750296   | C | G | 0.341423 | -0.020818 | 0.002042 | 2.09E-24   | 25OHD                    | 443734 |
| rs3768013   | A | G | 0.369605 | -0.01488  | 0.002011 | 1.37E-13   | 25OHD                    | 443734 |
| rs3775150   | C | T | 0.262221 | -0.090838 | 0.002474 | 3.90E-295  | 25OHD                    | 443734 |
| rs3814995   | T | C | 0.31224  | -0.014733 | 0.002109 | 2.83E-12   | 25OHD                    | 443734 |
| rs3822868   | G | A | 0.835029 | 0.021918  | 0.002745 | 1.41E-15   | 25OHD                    | 443734 |
| rs523583    | C | A | 0.469219 | 0.012174  | 0.001963 | 5.58E-10   | 25OHD                    | 443734 |
| rs532436    | A | G | 0.184388 | -0.015051 | 0.002515 | 2.17E-09   | 25OHD                    | 443734 |
| rs560384646 | C | A | 0.023835 | -0.193328 | 0.008601 | 6.91E-112  | 25OHD                    | 443734 |
| rs56044892  | T | C | 0.2107   | 0.015388  | 0.00244  | 2.85E-10   | 25OHD                    | 443734 |
| rs576242124 | A | G | 0.011317 | 0.114432  | 0.014508 | 3.08E-15   | 25OHD                    | 443734 |
| rs57631352  | G | A | 0.297255 | -0.012866 | 0.002128 | 1.48E-09   | 25OHD                    | 443734 |
| rs577185477 | C | T | 0.01469  | -0.379366 | 0.009583 | 1.624E-342 | 25OHD                    | 443734 |
| rs58073039  | G | A | 0.298368 | -0.014119 | 0.002109 | 2.16E-11   | 25OHD                    | 443734 |
| rs58542926  | T | C | 0.075847 | 0.032488  | 0.00367  | 8.57E-19   | 25OHD                    | 443734 |
| rs6123359   | G | A | 0.105192 | 0.032345  | 0.003213 | 7.74E-24   | 25OHD                    | 443734 |
| rs6127099   | T | A | 0.279034 | -0.036797 | 0.002219 | 9.30E-62   | 25OHD                    | 443734 |
| rs61816761  | A | G | 0.023096 | 0.125479  | 0.006905 | 8.57E-74   | 25OHD                    | 443734 |
| rs62007299  | A | G | 0.709377 | -0.014437 | 0.002145 | 1.69E-11   | 25OHD                    | 443734 |
| rs62130059  | C | A | 0.335823 | -0.02731  | 0.002255 | 9.25E-34   | 25OHD                    | 443734 |
| rs6438900   | G | C | 0.260706 | 0.013584  | 0.002221 | 9.59E-10   | 25OHD                    | 443734 |
| rs6698680   | G | A | 0.464195 | -0.011928 | 0.001947 | 8.99E-10   | 25OHD                    | 443734 |
| rs6724965   | G | A | 0.171608 | -0.016541 | 0.002573 | 1.29E-10   | 25OHD                    | 443734 |
| rs6773343   | T | C | 0.720232 | 0.01268   | 0.002171 | 5.20E-09   | 25OHD                    | 443734 |
| rs705117    | T | C | 0.849453 | -0.034494 | 0.002734 | 1.71E-36   | 25OHD                    | 443734 |
| rs71383766  | T | C | 0.419574 | 0.012569  | 0.002065 | 1.15E-09   | 25OHD                    | 443734 |
| rs73015021  | G | A | 0.121031 | 0.023034  | 0.002983 | 1.15E-14   | 25OHD                    | 443734 |
| rs7519574   | A | G | 0.181694 | 0.016991  | 0.002536 | 2.09E-11   | 25OHD                    | 443734 |
| rs7528419   | G | A | 0.224958 | 0.019031  | 0.002321 | 2.41E-16   | 25OHD                    | 443734 |
| rs7569755   | A | G | 0.292374 | 0.013923  | 0.002142 | 8.03E-11   | 25OHD                    | 443734 |
| rs7650253   | A | T | 0.689684 | 0.014562  | 0.002282 | 1.76E-10   | 25OHD                    | 443734 |
| rs7699711   | T | G | 0.454848 | -0.02864  | 0.001949 | 6.97E-49   | 25OHD                    | 443734 |
| rs7718395   | G | C | 0.319522 | 0.012632  | 0.002096 | 1.67E-09   | 25OHD                    | 443734 |
| rs77924615  | A | G | 0.197773 | -0.015792 | 0.002464 | 1.46E-10   | 25OHD                    | 443734 |
| rs7828742   | G | A | 0.596853 | -0.02193  | 0.00199  | 3.06E-28   | 25OHD                    | 443734 |
| rs78649910  | A | T | 0.110004 | -0.018331 | 0.003122 | 4.32E-09   | 25OHD                    | 443734 |
| rs8018720   | C | G | 0.820235 | -0.031949 | 0.002546 | 4.04E-36   | 25OHD                    | 443734 |
| rs804280    | A | C | 0.581959 | 0.013033  | 0.001978 | 4.43E-11   | 25OHD                    | 443734 |
| rs8063706   | T | A | 0.272828 | 0.012968  | 0.002198 | 3.64E-09   | 25OHD                    | 443734 |
| rs8091117   | A | C | 0.065396 | -0.024071 | 0.003943 | 1.03E-09   | 25OHD                    | 443734 |
| rs8103262   | C | T | 0.305004 | 0.012519  | 0.002114 | 3.18E-09   | 25OHD                    | 443734 |
| rs867772    | G | A | 0.681808 | -0.013838 | 0.002091 | 3.64E-11   | 25OHD                    | 443734 |
| rs960596    | T | C | 0.339588 | 0.012414  | 0.002076 | 2.23E-09   | 25OHD                    | 443734 |
| rs964184    | C | G | 0.863547 | 0.03977   | 0.002858 | 5.11E-44   | 25OHD                    | 443734 |
| rs9668081   | T | C | 0.47058  | 0.0116    | 0.001988 | 5.38E-09   | 25OHD                    | 443734 |
| rs33972313  | C | T | 0.96     | 5.98      | 1.15     | 2.00E-07   | absolute L-ascorbic acid | 15087  |
| rs2232315   | A | G | 0.03     | 0.74      | 0.15     | 1.26E-06   | absolute lycopene        | 441    |
| rs341075    | A | G | 0.02     | -0.87     | 0.17     | 5.75E-07   | absolute lycopene        | 441    |
| rs4635297   | A | C | 0.08     | 0.26      | 0.05     | 6.46E-07   | absolute lycopene        | 441    |
| rs6108801   | C | T | 0.04     | -0.48     | 0.09     | 4.07E-07   | absolute lycopene        | 441    |
| rs7680948   | A | C | 0.2      | -0.19     | 0.03     | 4.97E-09   | absolute lycopene        | 441    |
| rs10882272  | C | T | 0.35     | -0.03     | 0.004    | 6.51E-15   | absolute retinol         | 5006   |
| rs1667255   | C | A | 0.31     | 0.03      | 0.004    | 6.35E-14   | absolute retinol         | 5006   |
| rs11057830  | A | G | 0.15     | 0.03      | 0.01     | 8.20E-09   | absolute α -tocopherol   | 7781   |
| rs2108622   | T | C | 0.21     | 0.03      | 0.01     | 1.40E-10   | absolute α -tocopherol   | 7781   |
| rs11645428  | A | G | 0.345    | -0.129    | 0.015    | 1.50E-17   | absolute β -carotene     | 3918   |

|             |   |   |       |       |       |          |                            |        |
|-------------|---|---|-------|-------|-------|----------|----------------------------|--------|
| rs6420424   | A | G | 0.39  | 0.155 | 0.022 | 6.50E-13 | absolute $\beta$ -carotene | 1793   |
| rs6564851   | G | T | 0.395 | 0.149 | 0.015 | 1.60E-24 | absolute $\beta$ -carotene | 3881   |
| rs8044334   | G | T | 0.318 | 0.109 | 0.015 | 9.30E-13 | absolute $\beta$ -carotene | 3915   |
| rs16966952  | G | A | 0.69  | 0.199 | 0.031 | 2.40E-10 | Arachidonic acid (AA)      | 8631   |
| rs10129874  | C | T | 0.17  | 0.025 | 0.004 | 3.95E-13 | Calcium                    | 313903 |
| rs10224210  | C | T | 0.72  | 0.019 | 0.003 | 6.87E-11 | Calcium                    | 313903 |
| rs1035798   | A | G | 0.2   | 0.019 | 0.003 | 5.12E-09 | Calcium                    | 313903 |
| rs1036332   | C | A | 0.26  | 0.022 | 0.003 | 2.09E-13 | Calcium                    | 313903 |
| rs10444863  | T | C | 0.21  | 0.02  | 0.003 | 1.02E-09 | Calcium                    | 313903 |
| rs1048603   | A | G | 0.31  | 0.02  | 0.003 | 1.05E-12 | Calcium                    | 313903 |
| rs1064608   | G | C | 0.65  | 0.021 | 0.003 | 1.35E-14 | Calcium                    | 313903 |
| rs10739679  | G | A | 0.36  | 0.034 | 0.003 | 9.19E-35 | Calcium                    | 313903 |
| rs10754439  | T | G | 0.58  | 0.015 | 0.003 | 3.78E-08 | Calcium                    | 313903 |
| rs10898822  | A | G | 0.51  | 0.015 | 0.003 | 1.91E-08 | Calcium                    | 313903 |
| rs10917386  | T | C | 0.31  | 0.019 | 0.003 | 8.49E-12 | Calcium                    | 313903 |
| rs11078597  | C | T | 0.81  | 0.052 | 0.003 | 9.55E-54 | Calcium                    | 313903 |
| rs11117777  | C | T | 0.16  | 0.022 | 0.004 | 1.62E-09 | Calcium                    | 313903 |
| rs11122848  | A | G | 0.47  | 0.015 | 0.003 | 1.67E-08 | Calcium                    | 313903 |
| rs11187838  | G | A | 0.43  | 0.019 | 0.003 | 1.37E-12 | Calcium                    | 313903 |
| rs11218725  | G | A | 0.62  | 0.015 | 0.003 | 2.03E-08 | Calcium                    | 313903 |
| rs112371897 | T | C | 0.91  | 0.071 | 0.004 | 2.54E-56 | Calcium                    | 313903 |
| rs113911787 | A | G | 0.77  | 0.017 | 0.003 | 4.13E-08 | Calcium                    | 313903 |
| rs1150781   | C | G | 0.91  | 0.044 | 0.005 | 1.92E-21 | Calcium                    | 313903 |
| rs11538349  | C | T | 0.1   | 0.03  | 0.004 | 1.53E-11 | Calcium                    | 313903 |
| rs11577605  | A | G | 0.12  | 0.034 | 0.004 | 2.98E-17 | Calcium                    | 313903 |
| rs11584885  | G | A | 0.28  | 0.026 | 0.003 | 9.85E-19 | Calcium                    | 313903 |
| rs115946508 | A | C | 0.89  | 0.036 | 0.004 | 8.95E-18 | Calcium                    | 313903 |
| rs116004654 | T | C | 0.94  | 0.059 | 0.006 | 9.10E-25 | Calcium                    | 313903 |
| rs116140498 | C | T | 0.95  | 0.05  | 0.006 | 2.50E-17 | Calcium                    | 313903 |
| rs11629876  | C | T | 0.33  | 0.018 | 0.003 | 2.93E-11 | Calcium                    | 313903 |
| rs11632520  | C | T | 0.17  | 0.029 | 0.003 | 1.01E-16 | Calcium                    | 313903 |
| rs11687510  | C | T | 0.36  | 0.018 | 0.003 | 1.21E-10 | Calcium                    | 313903 |
| rs11730491  | T | G | 0.83  | 0.022 | 0.004 | 3.20E-10 | Calcium                    | 313903 |
| rs11746728  | C | T | 0.65  | 0.016 | 0.003 | 4.74E-09 | Calcium                    | 313903 |
| rs11753096  | C | T | 0.46  | 0.019 | 0.003 | 6.89E-13 | Calcium                    | 313903 |
| rs1177274   | T | G | 0.56  | 0.028 | 0.003 | 1.45E-26 | Calcium                    | 313903 |
| rs11777067  | T | C | 0.77  | 0.02  | 0.003 | 3.90E-11 | Calcium                    | 313903 |
| rs11792928  | C | T | 0.29  | 0.017 | 0.003 | 5.27E-09 | Calcium                    | 313903 |
| rs12212449  | C | T | 0.61  | 0.031 | 0.003 | 9.55E-31 | Calcium                    | 313903 |
| rs12294466  | T | C | 0.92  | 0.029 | 0.005 | 4.97E-09 | Calcium                    | 313903 |
| rs12339541  | C | A | 0.06  | 0.056 | 0.005 | 1.22E-25 | Calcium                    | 313903 |
| rs12378991  | G | A | 0.08  | 0.036 | 0.005 | 1.08E-13 | Calcium                    | 313903 |
| rs12519940  | C | T | 0.28  | 0.027 | 0.003 | 2.75E-20 | Calcium                    | 313903 |
| rs12534476  | G | A | 0.17  | 0.021 | 0.003 | 1.07E-09 | Calcium                    | 313903 |
| rs12583851  | T | C | 0.75  | 0.022 | 0.003 | 1.48E-13 | Calcium                    | 313903 |
| rs1260326   | T | C | 0.61  | 0.047 | 0.003 | 3.46E-69 | Calcium                    | 313903 |
| rs12613807  | C | T | 0.56  | 0.018 | 0.003 | 9.55E-12 | Calcium                    | 313903 |
| rs1262217   | A | G | 0.17  | 0.02  | 0.003 | 4.99E-09 | Calcium                    | 313903 |
| rs12675477  | T | C | 0.73  | 0.017 | 0.003 | 1.61E-08 | Calcium                    | 313903 |
| rs12794834  | C | T | 0.52  | 0.015 | 0.003 | 3.08E-08 | Calcium                    | 313903 |
| rs12917235  | C | T | 0.37  | 0.027 | 0.003 | 2.33E-23 | Calcium                    | 313903 |
| rs12918968  | A | C | 0.44  | 0.032 | 0.003 | 1.06E-34 | Calcium                    | 313903 |
| rs12922549  | C | T | 0.24  | 0.023 | 0.003 | 2.42E-13 | Calcium                    | 313903 |
| rs12932755  | A | G | 0.51  | 0.017 | 0.003 | 1.62E-10 | Calcium                    | 313903 |
| rs12933677  | T | C | 0.47  | 0.015 | 0.003 | 6.97E-09 | Calcium                    | 313903 |
| rs12974855  | A | G | 0.86  | 0.026 | 0.004 | 1.97E-11 | Calcium                    | 313903 |

|            |   |   |      |       |       |          |         |        |
|------------|---|---|------|-------|-------|----------|---------|--------|
| rs12998379 | G | A | 0.19 | 0.026 | 0.003 | 1.43E-14 | Calcium | 313903 |
| rs1303     | T | G | 0.74 | 0.021 | 0.003 | 4.69E-12 | Calcium | 313903 |
| rs13107325 | C | T | 0.93 | 0.059 | 0.005 | 1.14E-32 | Calcium | 313903 |
| rs13108218 | A | G | 0.62 | 0.039 | 0.003 | 4.07E-47 | Calcium | 313903 |
| rs13254847 | C | T | 0.22 | 0.023 | 0.003 | 1.33E-12 | Calcium | 313903 |
| rs13325    | G | A | 0.17 | 0.025 | 0.004 | 1.44E-12 | Calcium | 313903 |
| rs13389219 | C | T | 0.39 | 0.016 | 0.003 | 1.02E-09 | Calcium | 313903 |
| rs1354034  | T | C | 0.6  | 0.019 | 0.003 | 3.11E-13 | Calcium | 313903 |
| rs1476698  | A | G | 0.37 | 0.023 | 0.003 | 7.70E-17 | Calcium | 313903 |
| rs1495747  | C | T | 0.28 | 0.019 | 0.003 | 2.36E-10 | Calcium | 313903 |
| rs1604081  | C | T | 0.14 | 0.022 | 0.004 | 7.93E-09 | Calcium | 313903 |
| rs1621676  | G | A | 0.25 | 0.017 | 0.003 | 3.96E-08 | Calcium | 313903 |
| rs1657502  | T | G | 0.62 | 0.02  | 0.003 | 4.21E-13 | Calcium | 313903 |
| rs16844401 | A | G | 0.07 | 0.051 | 0.005 | 1.31E-21 | Calcium | 313903 |
| rs1688131  | T | C | 0.71 | 0.036 | 0.003 | 1.79E-35 | Calcium | 313903 |
| rs17164683 | C | T | 0.27 | 0.02  | 0.003 | 1.66E-11 | Calcium | 313903 |
| rs1749849  | C | T | 0.42 | 0.021 | 0.003 | 2.47E-15 | Calcium | 313903 |
| rs17668044 | A | G | 0.71 | 0.018 | 0.003 | 4.66E-10 | Calcium | 313903 |
| rs17774672 | G | A | 0.16 | 0.025 | 0.004 | 2.09E-12 | Calcium | 313903 |
| rs1780316  | C | T | 0.06 | 0.037 | 0.006 | 1.37E-11 | Calcium | 313903 |
| rs1801282  | C | G | 0.88 | 0.039 | 0.004 | 7.95E-22 | Calcium | 313903 |
| rs1827293  | G | A | 0.45 | 0.024 | 0.003 | 2.97E-19 | Calcium | 313903 |
| rs1858800  | T | C | 0.65 | 0.032 | 0.003 | 1.61E-30 | Calcium | 313903 |
| rs1875272  | G | A | 0.75 | 0.026 | 0.003 | 9.81E-17 | Calcium | 313903 |
| rs2004315  | T | C | 0.38 | 0.033 | 0.003 | 5.84E-35 | Calcium | 313903 |
| rs2070179  | C | T | 0.24 | 0.017 | 0.003 | 3.40E-08 | Calcium | 313903 |
| rs2100431  | A | C | 0.3  | 0.017 | 0.003 | 3.04E-09 | Calcium | 313903 |
| rs218671   | G | T | 0.55 | 0.016 | 0.003 | 6.44E-10 | Calcium | 313903 |
| rs2245715  | A | G | 0.1  | 0.024 | 0.004 | 4.45E-08 | Calcium | 313903 |
| rs2288920  | G | T | 0.83 | 0.026 | 0.004 | 1.12E-13 | Calcium | 313903 |
| rs2298615  | C | T | 0.23 | 0.019 | 0.003 | 1.27E-09 | Calcium | 313903 |
| rs2303914  | G | T | 0.52 | 0.02  | 0.003 | 2.07E-13 | Calcium | 313903 |
| rs2343592  | A | G | 0.27 | 0.023 | 0.003 | 2.71E-15 | Calcium | 313903 |
| rs2419886  | C | T | 0.26 | 0.023 | 0.003 | 2.91E-14 | Calcium | 313903 |
| rs2448036  | G | T | 0.11 | 0.029 | 0.004 | 4.28E-11 | Calcium | 313903 |
| rs2520265  | A | G | 0.29 | 0.022 | 0.003 | 5.23E-14 | Calcium | 313903 |
| rs2546056  | T | C | 0.86 | 0.026 | 0.004 | 8.33E-12 | Calcium | 313903 |
| rs2585135  | A | G | 0.54 | 0.015 | 0.003 | 1.85E-08 | Calcium | 313903 |
| rs2636695  | G | T | 0.77 | 0.021 | 0.003 | 2.74E-11 | Calcium | 313903 |
| rs2681417  | G | A | 0.93 | 0.037 | 0.005 | 2.82E-13 | Calcium | 313903 |
| rs2785171  | G | A | 0.61 | 0.015 | 0.003 | 1.76E-08 | Calcium | 313903 |
| rs2807880  | C | T | 0.18 | 0.02  | 0.003 | 1.87E-09 | Calcium | 313903 |
| rs2855799  | G | A | 0.81 | 0.018 | 0.003 | 4.06E-08 | Calcium | 313903 |
| rs28616221 | A | G | 0.82 | 0.046 | 0.003 | 4.53E-42 | Calcium | 313903 |
| rs2918247  | A | G | 0.23 | 0.017 | 0.003 | 2.48E-08 | Calcium | 313903 |
| rs3026445  | T | C | 0.37 | 0.018 | 0.003 | 2.52E-11 | Calcium | 313903 |
| rs302655   | G | T | 0.43 | 0.02  | 0.003 | 3.55E-14 | Calcium | 313903 |
| rs308981   | C | T | 0.12 | 0.023 | 0.004 | 2.25E-08 | Calcium | 313903 |
| rs3130618  | C | A | 0.8  | 0.021 | 0.003 | 2.50E-10 | Calcium | 313903 |
| rs3217795  | A | G | 0.09 | 0.025 | 0.005 | 4.95E-08 | Calcium | 313903 |
| rs34010237 | A | G | 0.84 | 0.03  | 0.004 | 1.39E-17 | Calcium | 313903 |
| rs34372369 | A | G | 0.05 | 0.044 | 0.006 | 1.27E-13 | Calcium | 313903 |
| rs34667500 | A | G | 0.88 | 0.038 | 0.004 | 3.14E-21 | Calcium | 313903 |
| rs34895054 | C | G | 0.26 | 0.019 | 0.003 | 4.86E-10 | Calcium | 313903 |
| rs35320690 | C | T | 0.72 | 0.026 | 0.003 | 4.71E-19 | Calcium | 313903 |
| rs35587941 | T | G | 0.57 | 0.015 | 0.003 | 1.37E-08 | Calcium | 313903 |

|            |   |   |      |       |       |          |         |        |
|------------|---|---|------|-------|-------|----------|---------|--------|
| rs35674179 | C | A | 0.9  | 0.026 | 0.004 | 2.00E-09 | Calcium | 313903 |
| rs35758545 | C | T | 0.35 | 0.016 | 0.003 | 3.10E-09 | Calcium | 313903 |
| rs35852840 | A | C | 0.94 | 0.031 | 0.006 | 4.70E-08 | Calcium | 313903 |
| rs36086195 | T | C | 0.42 | 0.018 | 0.003 | 3.78E-12 | Calcium | 313903 |
| rs36104352 | C | A | 0.88 | 0.03  | 0.004 | 7.60E-14 | Calcium | 313903 |
| rs3740690  | T | C | 0.44 | 0.015 | 0.003 | 1.92E-08 | Calcium | 313903 |
| rs3741628  | G | T | 0.57 | 0.022 | 0.003 | 1.24E-16 | Calcium | 313903 |
| rs3794695  | T | C | 0.81 | 0.019 | 0.003 | 1.21E-08 | Calcium | 313903 |
| rs3798236  | T | C | 0.37 | 0.017 | 0.003 | 7.93E-10 | Calcium | 313903 |
| rs3931841  | A | G | 0.68 | 0.027 | 0.003 | 2.37E-21 | Calcium | 313903 |
| rs41264630 | A | G | 0.92 | 0.027 | 0.005 | 1.51E-08 | Calcium | 313903 |
| rs413948   | G | A | 0.87 | 0.022 | 0.004 | 2.59E-08 | Calcium | 313903 |
| rs4376797  | A | G | 0.65 | 0.026 | 0.003 | 5.75E-21 | Calcium | 313903 |
| rs4594967  | A | G | 0.67 | 0.023 | 0.003 | 7.83E-17 | Calcium | 313903 |
| rs4633480  | A | G | 0.44 | 0.021 | 0.003 | 2.43E-15 | Calcium | 313903 |
| rs4758621  | A | G | 0.31 | 0.028 | 0.003 | 2.55E-22 | Calcium | 313903 |
| rs4763297  | C | A | 0.57 | 0.015 | 0.003 | 5.80E-09 | Calcium | 313903 |
| rs4790310  | C | T | 0.57 | 0.022 | 0.003 | 3.31E-17 | Calcium | 313903 |
| rs4805129  | T | C | 0.63 | 0.02  | 0.003 | 1.73E-13 | Calcium | 313903 |
| rs4915444  | C | A | 0.4  | 0.017 | 0.003 | 2.52E-10 | Calcium | 313903 |
| rs4917     | C | T | 0.36 | 0.038 | 0.003 | 5.43E-43 | Calcium | 313903 |
| rs4925104  | G | T | 0.47 | 0.018 | 0.003 | 1.90E-11 | Calcium | 313903 |
| rs4976647  | C | A | 0.67 | 0.018 | 0.003 | 1.03E-10 | Calcium | 313903 |
| rs498490   | C | T | 0.16 | 0.033 | 0.004 | 8.71E-21 | Calcium | 313903 |
| rs507666   | G | A | 0.19 | 0.021 | 0.003 | 2.69E-10 | Calcium | 313903 |
| rs55633823 | C | T | 0.75 | 0.022 | 0.003 | 1.45E-12 | Calcium | 313903 |
| rs55754498 | C | T | 0.05 | 0.033 | 0.006 | 2.37E-08 | Calcium | 313903 |
| rs56230940 | T | C | 0.93 | 0.031 | 0.005 | 3.20E-10 | Calcium | 313903 |
| rs56252617 | T | C | 0.6  | 0.015 | 0.003 | 4.02E-08 | Calcium | 313903 |
| rs56313825 | A | G | 0.6  | 0.015 | 0.003 | 1.44E-08 | Calcium | 313903 |
| rs56397046 | C | T | 0.33 | 0.021 | 0.003 | 2.24E-14 | Calcium | 313903 |
| rs5751350  | A | G | 0.67 | 0.016 | 0.003 | 1.75E-08 | Calcium | 313903 |
| rs57564578 | G | A | 0.07 | 0.033 | 0.005 | 1.08E-10 | Calcium | 313903 |
| rs58673639 | G | T | 0.79 | 0.018 | 0.003 | 6.34E-09 | Calcium | 313903 |
| rs6013892  | A | C | 0.93 | 0.032 | 0.005 | 6.19E-10 | Calcium | 313903 |
| rs60155540 | G | A | 0.2  | 0.021 | 0.003 | 2.57E-10 | Calcium | 313903 |
| rs611150   | T | C | 0.82 | 0.022 | 0.003 | 9.18E-11 | Calcium | 313903 |
| rs6118     | C | T | 0.9  | 0.03  | 0.004 | 8.86E-12 | Calcium | 313903 |
| rs61594679 | C | T | 0.29 | 0.018 | 0.003 | 4.23E-10 | Calcium | 313903 |
| rs61649210 | G | A | 0.45 | 0.015 | 0.003 | 1.35E-08 | Calcium | 313903 |
| rs61770531 | C | T | 0.91 | 0.036 | 0.005 | 8.13E-15 | Calcium | 313903 |
| rs61779309 | T | C | 0.21 | 0.02  | 0.003 | 9.79E-10 | Calcium | 313903 |
| rs62134669 | C | T | 0.85 | 0.024 | 0.004 | 1.22E-10 | Calcium | 313903 |
| rs62292542 | G | A | 0.11 | 0.032 | 0.004 | 2.37E-14 | Calcium | 313903 |
| rs62362239 | C | T | 0.67 | 0.02  | 0.003 | 7.53E-13 | Calcium | 313903 |
| rs62439474 | T | C | 0.7  | 0.022 | 0.003 | 4.81E-14 | Calcium | 313903 |
| rs6560613  | C | T | 0.91 | 0.034 | 0.005 | 6.79E-13 | Calcium | 313903 |
| rs6580981  | G | A | 0.46 | 0.019 | 0.003 | 4.69E-13 | Calcium | 313903 |
| rs6590227  | C | T | 0.12 | 0.025 | 0.004 | 5.42E-10 | Calcium | 313903 |
| rs66527777 | C | T | 0.17 | 0.022 | 0.004 | 2.79E-10 | Calcium | 313903 |
| rs6680117  | C | T | 0.18 | 0.027 | 0.003 | 3.20E-15 | Calcium | 313903 |
| rs6719061  | C | T | 0.6  | 0.019 | 0.003 | 6.19E-13 | Calcium | 313903 |
| rs6722613  | G | A | 0.57 | 0.016 | 0.003 | 5.31E-10 | Calcium | 313903 |
| rs6731551  | T | C | 0.48 | 0.015 | 0.003 | 1.26E-08 | Calcium | 313903 |
| rs6734610  | G | A | 0.48 | 0.023 | 0.003 | 1.58E-18 | Calcium | 313903 |
| rs6741561  | C | T | 0.39 | 0.04  | 0.003 | 1.85E-50 | Calcium | 313903 |

|             |   |   |          |           |          |          |                             |        |
|-------------|---|---|----------|-----------|----------|----------|-----------------------------|--------|
| rs681664    | C | T | 0.22     | 0.018     | 0.003    | 1.27E-08 | Calcium                     | 313903 |
| rs6830950   | T | C | 0.27     | 0.017     | 0.003    | 1.50E-08 | Calcium                     | 313903 |
| rs6841429   | C | A | 0.17     | 0.041     | 0.004    | 1.02E-31 | Calcium                     | 313903 |
| rs6894167   | C | T | 0.52     | 0.017     | 0.003    | 5.07E-11 | Calcium                     | 313903 |
| rs6909201   | A | G | 0.48     | 0.043     | 0.003    | 4.12E-60 | Calcium                     | 313903 |
| rs697852    | G | A | 0.82     | 0.022     | 0.003    | 3.13E-10 | Calcium                     | 313903 |
| rs7012637   | A | G | 0.52     | 0.023     | 0.003    | 5.48E-18 | Calcium                     | 313903 |
| rs7208714   | G | A | 0.75     | 0.027     | 0.003    | 1.75E-19 | Calcium                     | 313903 |
| rs7221118   | T | C | 0.21     | 0.021     | 0.003    | 1.18E-10 | Calcium                     | 313903 |
| rs722298    | A | G | 0.56     | 0.016     | 0.003    | 3.38E-09 | Calcium                     | 313903 |
| rs72740967  | C | T | 0.31     | 0.02      | 0.003    | 1.15E-12 | Calcium                     | 313903 |
| rs72847071  | G | A | 0.09     | 0.03      | 0.005    | 7.17E-11 | Calcium                     | 313903 |
| rs72999033  | T | C | 0.93     | 0.043     | 0.005    | 5.12E-16 | Calcium                     | 313903 |
| rs7312673   | A | G | 0.07     | 0.043     | 0.005    | 2.41E-17 | Calcium                     | 313903 |
| rs7313874   | T | C | 0.6      | 0.017     | 0.003    | 6.13E-10 | Calcium                     | 313903 |
| rs73183155  | C | T | 0.23     | 0.028     | 0.003    | 1.40E-18 | Calcium                     | 313903 |
| rs7320843   | C | T | 0.14     | 0.036     | 0.004    | 2.60E-22 | Calcium                     | 313903 |
| rs74753001  | C | T | 0.93     | 0.028     | 0.005    | 3.12E-08 | Calcium                     | 313903 |
| rs7559013   | C | A | 0.87     | 0.026     | 0.004    | 2.07E-11 | Calcium                     | 313903 |
| rs7568296   | T | C | 0.42     | 0.02      | 0.003    | 5.83E-14 | Calcium                     | 313903 |
| rs760077    | A | T | 0.61     | 0.027     | 0.003    | 1.84E-23 | Calcium                     | 313903 |
| rs76758508  | C | T | 0.32     | 0.015     | 0.003    | 4.19E-08 | Calcium                     | 313903 |
| rs77722590  | A | G | 0.85     | 0.023     | 0.004    | 2.38E-10 | Calcium                     | 313903 |
| rs7864156   | G | T | 0.61     | 0.018     | 0.003    | 1.42E-11 | Calcium                     | 313903 |
| rs7913072   | G | A | 0.86     | 0.021     | 0.004    | 3.95E-08 | Calcium                     | 313903 |
| rs7968405   | C | T | 0.82     | 0.022     | 0.003    | 2.24E-10 | Calcium                     | 313903 |
| rs8011945   | G | T | 0.09     | 0.026     | 0.005    | 1.14E-08 | Calcium                     | 313903 |
| rs80339483  | T | C | 0.93     | 0.031     | 0.005    | 1.81E-09 | Calcium                     | 313903 |
| rs8034835   | A | G | 0.47     | 0.019     | 0.003    | 9.95E-13 | Calcium                     | 313903 |
| rs80350997  | A | G | 0.92     | 0.046     | 0.005    | 1.03E-20 | Calcium                     | 313903 |
| rs8081353   | C | T | 0.1      | 0.025     | 0.004    | 1.21E-08 | Calcium                     | 313903 |
| rs838718    | G | A | 0.48     | 0.047     | 0.003    | 9.09E-73 | Calcium                     | 313903 |
| rs841572    | A | G | 0.59     | 0.033     | 0.003    | 1.30E-35 | Calcium                     | 313903 |
| rs848492    | A | G | 0.28     | 0.027     | 0.003    | 1.01E-19 | Calcium                     | 313903 |
| rs872629    | A | C | 0.89     | 0.02404   | 0.004    | 6.00E-09 | Calcium                     | 313903 |
| rs900399    | G | A | 0.6      | 0.019     | 0.003    | 3.79E-12 | Calcium                     | 313903 |
| rs915894    | T | G | 0.6      | 0.015     | 0.003    | 1.70E-08 | Calcium                     | 313903 |
| rs926103    | C | T | 0.35     | 0.022     | 0.003    | 8.02E-16 | Calcium                     | 313903 |
| rs9282641   | G | A | 0.92     | 0.036     | 0.005    | 2.71E-14 | Calcium                     | 313903 |
| rs9388399   | T | C | 0.31     | 0.024     | 0.003    | 1.94E-17 | Calcium                     | 313903 |
| rs9420589   | T | G | 0.56     | 0.017     | 0.003    | 6.74E-11 | Calcium                     | 313903 |
| rs9530      | A | G | 0.55     | 0.032     | 0.003    | 3.64E-34 | Calcium                     | 313903 |
| rs9562385   | A | C | 0.56     | 0.015     | 0.003    | 1.08E-08 | Calcium                     | 313903 |
| rs9635741   | C | A | 0.93     | 0.039     | 0.005    | 8.14E-15 | Calcium                     | 313903 |
| rs965344    | A | G | 0.79     | 0.031     | 0.003    | 1.08E-21 | Calcium                     | 313903 |
| rs9806062   | G | T | 0.89     | 0.026     | 0.004    | 5.10E-10 | Calcium                     | 313903 |
| rs9895661   | C | T | 0.83     | 0.028     | 0.003    | 5.04E-16 | Calcium                     | 313903 |
| rs1175550   | G | A | 0.22     | 0.198     | 0.032    | 5.03E-10 | Copper                      | 2603   |
| rs2769264   | G | T | 0.16     | 0.313     | 0.034    | 2.63E-20 | Copper                      | 2603   |
| rs11604424  | T | C | 0.756672 | -0.08311  | 0.014241 | 7.84E-09 | Docosahexaenoic acid (DHA)  | 13495  |
| rs143988316 | T | C | 0.069487 | -0.150045 | 0.024351 | 1.10E-09 | Docosahexaenoic acid (DHA)  | 13494  |
| rs145717049 | T | C | 0.044058 | -0.201292 | 0.03275  | 1.21E-09 | Docosahexaenoic acid (DHA)  | 13491  |
| rs174546    | T | C | 0.402849 | -0.127635 | 0.012483 | 4.81E-24 | Docosahexaenoic acid (DHA)  | 13499  |
| rs2281591   | G | A | 0.13372  | -0.108394 | 0.018174 | 3.66E-09 | Docosahexaenoic acid (DHA)  | 13498  |
| rs261334    | C | G | 0.769129 | -0.110247 | 0.014749 | 1.44E-13 | Docosahexaenoic acid (DHA)  | 13498  |
| rs3734398   | C | T | 0.43     | 0.04      | 0.003    | 1.00E-43 | Docosapentaenoic acid (DPA) | 8631   |

|             |   |   |          |           |          |           |                             |       |
|-------------|---|---|----------|-----------|----------|-----------|-----------------------------|-------|
| rs174538    | G | A | 0.72     | 0.083     | 0.005    | 5.00E-58  | Eicosapentaenoic acid (EPA) | 8631  |
| rs3798713   | C | G | 0.43     | 0.035     | 0.005    | 2.00E-12  | Eicosapentaenoic acid (EPA) | 8631  |
| rs1799945   | G | C | 0.15     | 0.189     | 0.01     | 1.10E-81  | Iron                        | 48972 |
| rs1800562   | A | G | 0.07     | 0.328     | 0.016    | 2.72E-97  | Iron                        | 48972 |
| rs855791    | G | A | 0.55     | 0.181     | 0.007    | 1.32E-139 | Iron                        | 48972 |
| rs1440580   | A | T | 0.481233 | 0.072612  | 0.00941  | 1.68E-14  | Isoleucine                  | 24772 |
| rs12325419  | A | G | 0.120221 | -0.082062 | 0.014985 | 4.55E-08  | Leucine                     | 22500 |
| rs17789027  | G | A | 0.384329 | 0.108594  | 0.009541 | 6.16E-30  | Leucine                     | 24725 |
| rs10402112  | A | T | 0.09963  | -0.171088 | 0.021087 | 7.90E-16  | Linoleic acid (LA)          | 13522 |
| rs12239737  | A | T | 0.260158 | -0.100493 | 0.014041 | 1.20E-12  | Linoleic acid (LA)          | 13523 |
| rs144064722 | G | A | 0.026298 | 0.230203  | 0.039539 | 7.45E-09  | Linoleic acid (LA)          | 13520 |
| rs144723570 | T | C | 0.01117  | -0.332453 | 0.059815 | 3.42E-08  | Linoleic acid (LA)          | 13523 |
| rs174418    | C | T | 0.562555 | -0.086064 | 0.012538 | 9.42E-12  | Linoleic acid (LA)          | 13524 |
| rs190934192 | A | G | 0.027535 | -0.248268 | 0.043367 | 1.32E-08  | Linoleic acid (LA)          | 13523 |
| rs4296389   | T | C | 0.325777 | -0.081438 | 0.013081 | 6.37E-10  | Linoleic acid (LA)          | 13521 |
| rs4609471   | A | C | 0.041643 | -0.253291 | 0.035446 | 1.30E-12  | Linoleic acid (LA)          | 13526 |
| rs7412      | T | C | 0.057292 | -0.295042 | 0.028251 | 3.40E-25  | Linoleic acid (LA)          | 13523 |
| rs76366838  | A | G | 0.018475 | 0.287426  | 0.049651 | 9.06E-09  | Linoleic acid (LA)          | 13524 |
| rs769449    | A | G | 0.156683 | 0.142266  | 0.016956 | 8.04E-17  | Linoleic acid (LA)          | 13524 |
| rs79225634  | T | C | 0.35159  | 0.096057  | 0.012933 | 1.66E-13  | Linoleic acid (LA)          | 13523 |
| rs821840    | G | A | 0.25211  | 0.083597  | 0.014639 | 1.43E-08  | Linoleic acid (LA)          | 13523 |
| rs9804646   | T | C | 0.124469 | -0.105674 | 0.019115 | 4.05E-08  | Linoleic acid (LA)          | 13520 |
| rs99780     | T | C | 0.401006 | 0.148368  | 0.012472 | 3.35E-32  | Linoleic acid (LA)          | 13523 |
| rs2863979   | a | g | 0.7241   | 0.0143    | 0.0017   | 1.44E-17  | lysine                      | 7812  |
| rs11144134  | C | T | 0.08     | 0.011     | 0.001    | 8.21E-15  | Magnesium                   | 23829 |
| rs13146355  | A | G | 0.44     | 0.005     | 0.001    | 6.27E-13  | Magnesium                   | 23829 |
| rs3925584   | T | C | 0.55     | 0.006     | 0.001    | 5.20E-16  | Magnesium                   | 23829 |
| rs4072037   | T | C | 0.54     | 0.01      | 0.001    | 2.01E-36  | Magnesium                   | 23829 |
| rs448378    | A | G | 0.53     | 0.004     | 0.001    | 1.25E-08  | Magnesium                   | 23829 |
| rs7965584   | A | G | 0.71     | 0.007     | 0.001    | 1.05E-16  | Magnesium                   | 23829 |
| rs320485    | t | c | 0.1324   | 0.0094    | 0.0017   | 4.97E-08  | methionine                  | 7795  |
| rs1718309   | G | A | 0.602584 | -0.077165 | 0.009719 | 2.50E-15  | Phenylalanine               | 22660 |
| rs182695896 | C | A | 0.018066 | 0.245321  | 0.040112 | 1.09E-09  | Phenylalanine               | 21467 |
| rs2731672   | C | T | 0.740037 | 0.094918  | 0.011618 | 3.85E-16  | Phenylalanine               | 20436 |
| rs4253238   | T | C | 0.555072 | 0.067292  | 0.010053 | 2.53E-11  | Phenylalanine               | 20435 |
| rs1697421   | A | G | 0.49     | 0.05      | 0.005    | 1.14E-27  | Phosphorus                  | 21726 |
| rs17265703  | A | G | 0.85     | 0.036     | 0.006    | 4.32E-09  | Phosphorus                  | 21733 |
| rs2970818   | A | T | 0.09     | 0.047     | 0.008    | 4.38E-09  | Phosphorus                  | 21734 |
| rs9469578   | C | T | 0.92     | 0.059     | 0.009    | 1.11E-11  | Phosphorus                  | 21734 |
| rs947583    | C | T | 0.29     | 0.035     | 0.005    | 3.45E-12  | Phosphorus                  | 21733 |
| rs11167905  | C | T | 0.15     | -0.08     | 0.0164   | 9.83E-07  | relative ascorbate          | 2063  |
| rs13069990  | T | C | 0.62     | -0.05     | 0.011    | 4.44E-06  | relative ascorbate          | 2063  |
| rs13103690  | G | T | 0.46     | 0.05      | 0.0104   | 5.20E-06  | relative ascorbate          | 2063  |
| rs2070006   | C | T | 0.63     | -0.05     | 0.0112   | 4.76E-06  | relative ascorbate          | 2063  |
| rs577596    | A | G | 0.33     | -0.06     | 0.0114   | 6.68E-07  | relative ascorbate          | 2063  |
| rs6713914   | C | T | 0.43     | -0.06     | 0.0116   | 3.22E-07  | relative ascorbate          | 2063  |
| rs6826474   | T | C | 0.04     | -0.14     | 0.0288   | 1.56E-06  | relative ascorbate          | 2063  |
| rs6834631   | G | T | 0.04     | -0.13     | 0.0267   | 1.03E-06  | relative ascorbate          | 2063  |
| rs7112460   | T | C | 0.07     | 0.11      | 0.0223   | 1.14E-06  | relative ascorbate          | 2063  |
| rs8057559   | T | C | 0.03     | 0.14      | 0.0314   | 9.10E-06  | relative ascorbate          | 2063  |
| rs808686    | A | G | 0.49     | 0.06      | 0.0128   | 3.01E-06  | relative ascorbate          | 2063  |
| rs8105491   | T | G | 0.85     | -0.07     | 0.0148   | 2.30E-06  | relative ascorbate          | 2063  |
| rs9419004   | C | G | 0.19     | -0.25     | 0.0563   | 6.53E-06  | relative ascorbate          | 2063  |
| rs9606290   | A | G | 0.24     | 0.16      | 0.0352   | 6.32E-06  | relative ascorbate          | 2063  |
| rs10019071  | A | G | 0.019    | 0.66      | 0.16     | 3.64E-06  | relative retinol            | 1957  |
| rs112293959 | G | A | 0.03117  | -0.43     | 0.13     | 5.70E-06  | relative retinol            | 1957  |

|             |   |   |         |         |        |          |                        |      |
|-------------|---|---|---------|---------|--------|----------|------------------------|------|
| rs114515641 | G | T | 0.03    | 0.41    | 0.13   | 7.12E-06 | relative retinol       | 1957 |
| rs1153379   | A | G | 0.92872 | -0.32   | 0.08   | 6.10E-06 | relative retinol       | 1957 |
| rs1176744   | C | A | 0.3183  | -0.21   | 0.05   | 3.51E-07 | relative retinol       | 1957 |
| rs118025446 | A | G | 0.03091 | -0.48   | 0.12   | 9.84E-06 | relative retinol       | 1957 |
| rs12955464  | G | C | 0.1423  | -0.23   | 0.06   | 3.71E-06 | relative retinol       | 1957 |
| rs139726207 | G | A | 0.03883 | 0.37    | 0.11   | 4.46E-06 | relative retinol       | 1957 |
| rs149478645 | G | A | 0.02402 | -0.51   | 0.14   | 1.30E-06 | relative retinol       | 1957 |
| rs17005512  | C | G | 0.17    | -0.22   | 0.06   | 2.77E-06 | relative retinol       | 1957 |
| rs1842947   | G | A | 0.5217  | -0.19   | 0.04   | 8.34E-07 | relative retinol       | 1957 |
| rs2147337   | G | T | 0.66    | 0.16    | 0.04   | 9.00E-06 | relative retinol       | 1957 |
| rs2367816   | G | A | 0.7713  | 0.23    | 0.05   | 9.46E-06 | relative retinol       | 1957 |
| rs2417325   | T | C | 0.93306 | 0.33    | 0.08   | 1.29E-06 | relative retinol       | 1957 |
| rs3890033   | C | T | 0.3835  | 0.14    | 0.04   | 8.56E-06 | relative retinol       | 1957 |
| rs3898702   | T | C | 0.1995  | -0.22   | 0.05   | 3.02E-06 | relative retinol       | 1957 |
| rs4135385   | G | A | 0.2366  | 0.21    | 0.05   | 9.80E-06 | relative retinol       | 1957 |
| rs58411567  | A | G | 0.2156  | -0.21   | 0.05   | 3.02E-07 | relative retinol       | 1957 |
| rs6550239   | A | G | 0.7422  | -0.18   | 0.05   | 4.40E-06 | relative retinol       | 1957 |
| rs75308833  | T | C | 0.02248 | -0.49   | 0.15   | 3.51E-06 | relative retinol       | 1957 |
| rs7926028   | T | G | 0.4451  | -0.13   | 0.04   | 2.75E-06 | relative retinol       | 1957 |
| rs945817    | A | G | 0.1924  | -0.28   | 0.05   | 6.46E-07 | relative retinol       | 1957 |
| rs9586119   | C | T | 0.07282 | 0.35    | 0.08   | 3.34E-06 | relative retinol       | 1957 |
| rs10163969  | T | G | 0.04    | -0.04   | 0.008  | 9.39E-06 | relative α -tocopherol | 7276 |
| rs10245705  | T | C | 0.02    | -0.07   | 0.0127 | 1.95E-07 | relative α -tocopherol | 7276 |
| rs10935814  | A | G | 0.1     | -0.04   | 0.0083 | 9.44E-06 | relative α -tocopherol | 7276 |
| rs11145330  | A | C | 0.89    | 0.03    | 0.0068 | 1.95E-06 | relative α -tocopherol | 7276 |
| rs11992435  | A | G | 0.95    | 0.03    | 0.0072 | 6.38E-06 | relative α -tocopherol | 7276 |
| rs1404410   | C | G | 0.79    | -0.02   | 0.0052 | 4.57E-06 | relative α -tocopherol | 7276 |
| rs1532701   | A | G | 0.55    | 0.01    | 0.003  | 5.07E-06 | relative α -tocopherol | 7276 |
| rs2074731   | A | C | 0.17    | -0.02   | 0.0039 | 2.31E-06 | relative α -tocopherol | 7276 |
| rs261342    | C | G | 0.79    | -0.02   | 0.0037 | 5.41E-06 | relative α -tocopherol | 7276 |
| rs7238006   | T | C | 0.93    | 0.03    | 0.0057 | 6.77E-07 | relative α -tocopherol | 7276 |
| rs7930821   | T | C | 0.02    | 0.07    | 0.0149 | 7.53E-06 | relative α -tocopherol | 7276 |
| rs10077932  | T | C | 0.14    | -0.04   | 0.0087 | 4.08E-06 | relative γ -tocopherol | 5822 |
| rs1013104   | T | C | 0.44    | -0.02   | 0.0045 | 3.83E-06 | relative γ -tocopherol | 5822 |
| rs10466757  | A | T | 0.16    | 0.06    | 0.0143 | 9.56E-06 | relative γ -tocopherol | 5822 |
| rs10492212  | T | C | 0.16    | -0.03   | 0.0062 | 8.66E-06 | relative γ -tocopherol | 5822 |
| rs10520845  | A | C | 0.02    | 0.19    | 0.0419 | 5.27E-06 | relative γ -tocopherol | 5822 |
| rs1060467   | A | G | 0.59    | 0.02    | 0.0045 | 2.61E-07 | relative γ -tocopherol | 5822 |
| rs13336771  | A | C | 0.17    | 0.06    | 0.0139 | 7.39E-06 | relative γ -tocopherol | 5822 |
| rs261301    | T | C | 0.13    | 0.03    | 0.0068 | 2.06E-06 | relative γ -tocopherol | 5822 |
| rs2794327   | T | C | 0.67    | -0.04   | 0.008  | 8.78E-06 | relative γ -tocopherol | 5822 |
| rs5994305   | A | G | 0.83    | 0.03    | 0.0062 | 7.15E-07 | relative γ -tocopherol | 5822 |
| rs6821770   | A | G | 0.14    | 0.04    | 0.0086 | 8.92E-06 | relative γ -tocopherol | 5822 |
| rs7038957   | T | C | 0.83    | -0.03   | 0.0062 | 3.86E-06 | relative γ -tocopherol | 5822 |
| rs7350776   | C | G | 0.7     | 0.02    | 0.0052 | 3.86E-06 | relative γ -tocopherol | 5822 |
| rs1016522   | A | G | 0.5803  | 0.0058  | 0.0009 | 1.59E-10 | tryotophan             | 7804 |
| rs13122250  | T | C | 0.5542  | 0.0062  | 0.0009 | 8.95E-12 | tryotophan             | 7804 |
| rs1373962   | T | C | 0.5973  | 0.005   | 0.0009 | 2.71E-08 | tryotophan             | 7804 |
| rs1559063   | C | G | 0.6209  | 0.0052  | 0.0009 | 7.82E-09 | tryotophan             | 7804 |
| rs21111118  | T | C | 0.6207  | 0.0051  | 0.0009 | 1.21E-08 | tryotophan             | 7804 |
| rs284191    | A | G | 0.615   | -0.006  | 0.001  | 1.97E-09 | tryotophan             | 7804 |
| rs38271     | A | G | 0.5925  | -0.0051 | 0.0009 | 1.19E-08 | tryotophan             | 7804 |
| rs4306882   | T | G | 0.6153  | -0.0057 | 0.0009 | 2.52E-10 | tryotophan             | 7804 |
| rs4615256   | A | G | 0.5327  | 0.0049  | 0.0009 | 4.99E-08 | tryotophan             | 7804 |
| rs4695138   | A | T | 0.5352  | 0.0052  | 0.0009 | 8.00E-09 | tryotophan             | 7804 |
| rs4958379   | A | G | 0.433   | -0.005  | 0.0009 | 2.18E-08 | tryotophan             | 7804 |



|             |   |   |          |           |          |          |            |       |
|-------------|---|---|----------|-----------|----------|----------|------------|-------|
| rs603446    | T | C | 0.4448   | 0.0051    | 0.0009   | 1.38E-08 | tryotophan | 7804  |
| rs6480970   | A | G | 0.6159   | -0.0049   | 0.0009   | 4.29E-08 | tryotophan | 7804  |
| rs6901004   | C | G | 0.5742   | -0.0061   | 0.0009   | 1.08E-11 | tryotophan | 7804  |
| rs6935961   | A | G | 0.5578   | -0.0056   | 0.0009   | 3.75E-10 | tryotophan | 7804  |
| rs710580    | A | C | 0.3566   | -0.005    | 0.0009   | 3.57E-08 | tryotophan | 7804  |
| rs7463805   | T | C | 0.5213   | -0.0053   | 0.0009   | 4.60E-09 | tryotophan | 7804  |
| rs7584842   | T | C | 0.5377   | -0.005    | 0.0009   | 4.15E-08 | tryotophan | 7804  |
| rs9511152   | A | G | 0.559    | -0.005    | 0.0009   | 2.99E-08 | tryotophan | 7804  |
| rs972459    | T | C | 0.5787   | 0.005     | 0.0009   | 1.97E-08 | tryotophan | 7804  |
| rs10211524  | A | G | 0.40991  | 0.086403  | 0.009427 | 5.24E-20 | Valine     | 24898 |
| rs2072560   | C | T | 0.928539 | 0.104738  | 0.017688 | 3.28E-09 | Valine     | 24895 |
| rs7406661   | C | T | 0.243378 | 0.079073  | 0.012727 | 5.35E-10 | Valine     | 22659 |
| rs7655059   | G | C | 0.217667 | -0.068459 | 0.011163 | 8.91E-10 | Valine     | 24897 |
| rs9637599   | C | A | 0.46958  | 0.113927  | 0.009156 | 1.67E-35 | Valine     | 24899 |
| rs1256335   | A | G | 0.79     | 0.14      | 0.02     | 1.40E-15 | Vitamin B6 | 4763  |
| rs4654748   | T | C | 0.52     | 0.1       | 0.01     | 4.30E-11 | Vitamin B6 | 4763  |
| rs10051765  | C | T | 0.342    | 0.039     | 0.007    | 3.64E-09 | vitamin C  | 52018 |
| rs10136000  | A | G | 0.283    | 0.04      | 0.007    | 1.33E-08 | vitamin C  | 52018 |
| rs117885456 | A | G | 0.087    | 0.078     | 0.012    | 1.70E-11 | vitamin C  | 52018 |
| rs13028225  | T | C | 0.857    | 0.102     | 0.009    | 2.38E-30 | vitamin C  | 52018 |
| rs174547    | C | T | 0.328    | 0.036     | 0.007    | 3.84E-08 | vitamin C  | 52018 |
| rs2559850   | A | G | 0.598    | 0.058     | 0.006    | 6.30E-20 | vitamin C  | 52018 |
| rs56738967  | C | G | 0.321    | 0.041     | 0.007    | 7.62E-10 | vitamin C  | 52018 |
| rs6693447   | T | G | 0.551    | 0.039     | 0.006    | 6.25E-10 | vitamin C  | 52018 |
| rs7740812   | G | A | 0.594    | 0.038     | 0.006    | 1.88E-09 | vitamin C  | 52018 |
| rs1532423   | A | G | 0.37     | 0.178     | 0.026    | 6.40E-12 | Zinc       | 2603  |
| rs2120019   | T | C | 0.79     | 0.287     | 0.033    | 1.55E-18 | Zinc       | 2603  |

**Table S2.** Causal effects of each nutrient on fraction anisotropy (FA) and mean diffusivity (MD) identified by different MR methods.

| Exposures                          | Methods         | No. SNPs | FA                          | MD      |                        |         |
|------------------------------------|-----------------|----------|-----------------------------|---------|------------------------|---------|
|                                    |                 |          | OR (95%CI)                  | p-Value | OR (95%CI)             | p-Value |
| Amino acids                        |                 |          |                             |         |                        |         |
| Phenylalanine                      | Simple median   | 4        | 1.197(0.573,2.497)          | 0.632   | 0.705(0.344,1.444)     | 0.339   |
|                                    | Weighted median | 4        | 1.043(0.517,2.106)          | 0.907   | 0.782(0.390,1.567)     | 0.488   |
|                                    | MR Egger        | 4        | 1.169(0.133,10.304)         | 0.901   | 0.729(0.079,6.727)     | 0.806   |
|                                    | IVW             | 4        | 1.180(0.655,2.125)          | 0.582   | 0.799(0.438,1.457)     | 0.464   |
| Leucine                            | Simple median   | 3        | 1.561(0.783,3.113)          | 0.206   | 1.153(0.518,2.567)     | 0.727   |
|                                    | Weighted median | 3        | 1.645(0.893,3.030)          | 0.110   | 1.030(0.540,1.965)     | 0.929   |
|                                    | MR Egger        | 3        | 2.393(0.049,117.552)        | 0.737   | 0.278(0.005,14.878)    | 0.642   |
|                                    | IVW             | 3        | 1.651(0.925,2.949)          | 0.090   | 1.121(0.620,2.028)     | 0.704   |
| Valine                             | Simple median   | 4        | 1.002(0.482,2.083)          | 0.995   | 1.308(0.638,2.685)     | 0.464   |
|                                    | Weighted median | 4        | 1.274(0.653,2.485)          | 0.478   | 0.825(0.444,1.536)     | 0.545   |
|                                    | MR Egger        | 4        | 21.965(0.762,633.411)       | 0.213   | 0.130(0.004,4.041)     | 0.365   |
|                                    | IVW             | 4        | 1.307(0.780,2.192)          | 0.310   | 0.997(0.585,1.701)     | 0.992   |
| Tryptophan                         | Simple median   | 17       | 56.239(0.224,14122.721)     | 0.153   | 8.882(0.025,3148.921)  | 0.466   |
|                                    | Weighted median | 17       | 31.565(0.120,8284.921)      | 0.224   | 6.263(0.016,2507.617)  | 0.548   |
|                                    | MR Egger        | 17       | 46.048(0.000, 2.873E+26)    | 0.897   | 0.000(0.000,5.671E+22) | 0.769   |
|                                    | IVW             | 17       | 9.750(0.146,651.319)        | 0.288   | 0.666(0.007,63.795)    | 0.862   |
| Polyunsaturated fatty acids        |                 |          |                             |         |                        |         |
| Dihomo-gamma-linolenic acid (DGLA) | IVW             | 2        | 0.727(0.588,0.899)          | 0.003   | 1.200(0.969,1.488)     | 0.095   |
| Docosahexaenoic acid (DHA)         | Simple median   | 5        | 1.464(0.695,3.081)          | 0.316   | 1.056(0.557,2.000)     | 0.868   |
|                                    | Weighted median | 5        | 1.575(0.818,3.033)          | 0.174   | 0.839(0.487,1.446)     | 0.527   |
|                                    | MR Egger        | 5        | 14.639(1.26,170.016)        | 0.121   | 1.651(0.185,14.763)    | 0.684   |
|                                    | IVW             | 5        | 1.533(0.816,2.881)          | 0.184   | 0.830(0.531,1.297)     | 0.413   |
| Docosapentaenoic acid (DPA)        | IVW             | 2        | 3.798(0.687,20.981)         | 0.126   | 0.948(0.196,4.577)     | 0.947   |
|                                    | Simple median   | 3        | \                           | \       | 0.568(0.198,1.634)     | 0.295   |
|                                    | Weighted median | 3        | \                           | \       | 0.310(0.037,2.608)     | 0.476   |
|                                    | MR Egger        | 3        | \                           | \       | 0.577(0.209,1.592)     | 0.288   |
| Gamma linolenic acid (GLA)         | IVW             | 2        | 1131.012(0.156,8203097.297) | 0.121   | 0.122(0.000,392.412)   | 0.610   |
| Arachidonic acid (AA)              | IVW             | 2        | 1.081(1.027,1.138)          | 0.003   | 0.971(0.908,1.038)     | 0.381   |
| Linoleic acid (LA)                 | Simple median   | 15       | 0.788(0.567,1.094)          | 0.154   | 1.243(0.889,1.738)     | 0.203   |
|                                    | Weighted median | 15       | 0.776(0.579,1.040)          | 0.089   | 1.248(0.924,1.684)     | 0.148   |
|                                    | MR Egger        | 15       | 0.874(0.516,1.479)          | 0.623   | 0.896(0.476,1.685)     | 0.738   |
|                                    | IVW             | 15       | 0.776(0.616,0.978)          | 0.032   | 1.174(0.884,1.559)     | 0.269   |
| Minerals                           |                 |          |                             |         |                        |         |
| Copper                             | IVW             | 2        | 1.045(0.527,2.072)          | 0.899   | 1.079(0.625,1.861)     | 0.785   |
| Calcium                            | Simple median   | 170      | 0.852(0.533,1.363)          | 0.504   | 1.237(0.788,1.941)     | 0.356   |
|                                    | Weighted median | 170      | 0.734(0.456,1.180)          | 0.202   | 1.419(0.875,2.301)     | 0.156   |
|                                    | MR Egger        | 170      | 0.649(0.238,1.769)          | 0.399   | 2.915(1.054,8.067)     | 0.041   |
|                                    | IVW             | 170      | 0.880(0.626,1.238)          | 0.464   | 1.147(0.809,1.627)     | 0.440   |
| Iron                               | IVW             | 2        | 1.106(0.795,1.539)          | 0.549   | 0.963(0.687,1.350)     | 0.828   |
| Phosphorus                         | Simple median   | 4        | 2.326(0.547,9.879)          | 0.253   | 0.849(0.181,3.987)     | 0.835   |
|                                    | Weighted median | 4        | 1.547(0.400,5.991)          | 0.527   | 1.511(0.378,6.034)     | 0.559   |
|                                    | MR Egger        | 4        | 3.821(0.009,1579.634)       | 0.705   | 2.095(0.000,15046.597) | 0.885   |

|                       |                 |    |                       |       |                            |       |
|-----------------------|-----------------|----|-----------------------|-------|----------------------------|-------|
| Zinc                  | IVW             | 4  | 1.723(0.534,5.556)    | 0.363 | 0.976(0.236,4.040)         | 0.974 |
|                       | IVW             | 2  | 1.370(0.937,2.003)    | 0.105 | 0.783(0.583,1.051)         | 0.104 |
| Magnesium             | Simple median   | 6  | 0.355(0,807.923)      | 0.793 | 3.086(0.001,11821.779)     | 0.789 |
|                       | Weighted median | 6  | 0.090(0.000,87.584)   | 0.492 | 16.662(0.013,21367.822)    | 0.441 |
|                       | MR Egger        | 6  | 0.000(0.000,3054.916) | 0.389 | 67101.982(0.006,6.982E+11) | 0.249 |
|                       | IVW             | 6  | 0.028(0.000,6.920)    | 0.204 | 86.438(0.313,23892.511)    | 0.120 |
| <b>Vitamins</b>       |                 |    |                       |       |                            |       |
| Absolute α-tocopherol | IVW             | 2  | 1.699(0.156,18.524)   | 0.663 | 0.730(0.001,364.012)       | 0.921 |
| Relative α-tocopherol | Simple median   | 9  | 1.219(0.148,10.054)   | 0.854 | 0.617(0.065,5.858)         | 0.674 |
|                       | Weighted median | 9  | 1.126(0.134,9.439)    | 0.913 | 0.518(0.064,4.198)         | 0.537 |
|                       | MR Egger        | 9  | 1.516(0.067,34.224)   | 0.801 | 0.503(0.021,12.155)        | 0.685 |
|                       | IVW             | 9  | 1.301(0.273,6.204)    | 0.741 | 0.638(0.129,3.149)         | 0.581 |
| Relative γ-tocopherol | Simple median   | 11 | 1.261(0.408,3.896)    | 0.687 | 1.337(0.339,5.269)         | 0.678 |
|                       | Weighted median | 11 | 1.367(0.470,3.975)    | 0.566 | 1.344(0.381,4.735)         | 0.646 |
|                       | MR Egger        | 11 | 1.344(0.210,8.582)    | 0.762 | 0.915(0.093,9.049)         | 0.941 |
|                       | IVW             | 11 | 1.170(0.502,2.726)    | 0.717 | 1.192(0.440,3.224)         | 0.730 |
| 25OHD                 | Simple median   | 58 | 1.158(0.499,2.687)    | 0.733 | 1.137(0.489,2.640)         | 0.766 |
|                       | Weighted median | 58 | 1.470(0.712,3.035)    | 0.297 | 1.115(0.536,2.320)         | 0.770 |
|                       | MR Egger        | 58 | 1.193(0.576,2.472)    | 0.637 | 0.801(0.401,1.600)         | 0.532 |
|                       | IVW             | 58 | 1.112(0.674,1.835)    | 0.677 | 1.000(0.620,1.613)         | 0.999 |
| Absolute lycopene     | Simple median   | 5  | 0.946(0.729,1.227)    | 0.674 | 0.992(0.769,1.279)         | 0.948 |
|                       | Weighted median | 5  | 1.052(0.854,1.295)    | 0.635 | 0.918(0.746,1.130)         | 0.420 |
|                       | MR Egger        | 5  | 1.331(0.964,1.839)    | 0.181 | 0.784(0.564,1.091)         | 0.245 |
|                       | IVW             | 5  | 1.076(0.902,1.283)    | 0.416 | 0.963(0.807,1.149)         | 0.673 |
| Relative ascorbate    | Simple median   | 13 | 1.141(0.669,1.945)    | 0.628 | 0.862(0.482,1.544)         | 0.618 |
|                       | Weighted median | 13 | 0.995(0.609,1.626)    | 0.985 | 1.206(0.702,2.073)         | 0.498 |
|                       | MR Egger        | 13 | 0.641(0.275,1.493)    | 0.325 | 2.082(0.878,4.938)         | 0.124 |
|                       | IVW             | 13 | 1.132(0.790,1.623)    | 0.499 | 1.061(0.733,1.536)         | 0.753 |
| Vitamin C             | Simple median   | 9  | 1.038(0.510,2.111)    | 0.918 | 2.298(0.913,5.783)         | 0.077 |
|                       | Weighted median | 9  | 1.068(0.602,1.897)    | 0.821 | 0.843(0.478,1.488)         | 0.556 |
|                       | MR Egger        | 9  | 1.314(0.515,3.355)    | 0.586 | 0.685(0.339,1.384)         | 0.327 |
|                       | IVW             | 9  | 0.878(0.473,1.627)    | 0.678 | 1.191(0.695,2.041)         | 0.525 |
| Absolute retinol      | IVW             | 2  | 3.987(0.538,29.553)   | 0.176 | 0.510(0.066,3.946)         | 0.519 |
| Relative retinol      | Simple median   | 21 | 1.199(1.033,1.391)    | 0.017 | 0.941(0.809,1.095)         | 0.435 |
|                       | Weighted median | 21 | 1.033(0.886,1.205)    | 0.675 | 0.945(0.817,1.093)         | 0.444 |
|                       | MR Egger        | 21 | 1.206(0.898,1.618)    | 0.228 | 0.990(0.745,1.317)         | 0.946 |
|                       | IVW             | 21 | 1.054(0.944,1.177)    | 0.353 | 0.965(0.867,1.074)         | 0.516 |

FA, fractional order anisotropy; MD, mean diffusivity; MR, Mendelian randomization; SNPs, single nucleotide polymorphisms; OR, odds ratio; 95% CI, 95% confidence interval; IVW, inverse variance weighting; 25OHD: 25-hydroxyvitamin D.

**Table S3.** Results of the MR–Egger intercept and Cochran's Q tests for fraction anisotropy (FA) and mean diffusivity (MD).

| Exposures                          | FA        |          |             |          | MD        |          |             |          |
|------------------------------------|-----------|----------|-------------|----------|-----------|----------|-------------|----------|
|                                    | MR–Egger  |          | Cochran's Q |          | MR–Egger  |          | Cochran's Q |          |
|                                    | Intercept | <i>p</i> | Q           | <i>p</i> | Intercept | <i>p</i> | Q           | <i>p</i> |
| <b>Amino acids</b>                 |           |          |             |          |           |          |             |          |
| Phenylalanine                      | 0.001     | 0.994    | 1.095       | 0.778    | 0.008     | 0.941    | 1.617       | 0.655    |
| Leucine                            | -0.035    | 0.881    | 0.037       | 0.982    | 0.131     | 0.614    | 0.037       | 0.982    |
| Valine                             | -0.277    | 0.238    | 3.097       | 0.377    | 0.200     | 0.361    | 3.097       | 0.376    |
| Tryotophan                         | -0.008    | 0.958    | 19.072      | 0.265    | 0.048     | 0.778    | 19.072      | 0.264    |
| <b>Polyunsaturated fatty acids</b> |           |          |             |          |           |          |             |          |
| Dihomogamma-linolenic acid (DGLA)  | NA        | NA       | 1.024       | 0.311    | NA        | NA       | 1.024       | 0.311    |
| Docosahexaenoic acid (DHA)         | -0.271    | 0.163    | 8.350       | 0.080    | -0.083    | 0.574    | 1.839       | 0.765    |
| Docosapentaenoic acid (DPA)        | NA        | NA       | 2.846       | 0.092    | 0.035     | 0.633    | 2.846       | 0.092    |
| Gamma linolenic acid (GLA)         | NA        | NA       | 2.909       | 0.088    | NA        | NA       | 2.909       | 0.088    |
| Arachidonic acid (AA)              | NA        | NA       | 1.010       | 0.315    | NA        | NA       | 1.010       | 0.315    |
| Linoleic acid (LA)                 | -0.049    | 0.255    | 15.838      | 0.199    | 0.055     | 0.335    | 18,410      | 0.189    |
| <b>Minerals</b>                    |           |          |             |          |           |          |             |          |
| Copper                             | NA        | NA       | 5.905       | 0.015    | NA        | NA       | 5.905       | 0.015    |
| Calcium                            | 0.008     | 0.527    | 223.249     | 0.003    | -0.025    | 0.058    | 223.249     | 0.003    |
| Iron                               | NA        | NA       | 0.003       | 0.955    | NA        | NA       | 0.003       | 0.955    |
| Phosphorus                         | -0.036    | 0.816    | 1.617       | 0.655    | -0.035    | 0.879    | 1.095       | 0.778    |
| Zinc                               | NA        | NA       | 1.736       | 0.188    | NA        | NA       | 1.736       | 0.188    |
| Magnesium                          | 0.032     | 0.607    | 2.163       | 0.826    | -0.050    | 0.438    | 2.162       | 0.826    |
| <b>Vitamins</b>                    |           |          |             |          |           |          |             |          |
| Absolute $\alpha$ -tocopherol      | NA        | NA       | 0.834       | 0.361    | NA        | NA       | 0.834       | 0.361    |
| Relative $\alpha$ -tocopherol      | -0.005    | 0.915    | 4.556       | 0.804    | 0.008     | 0.870    | 4.556       | 0.804    |
| Relative $\gamma$ -tocopherol      | -0.006    | 0.873    | 4.207       | 0.938    | 0.011     | 0.806    | 4.206       | 0.938    |
| 25OHD                              | -0.003    | 0.796    | 73.629      | 0.068    | 0.009     | 0.388    | 73.629      | 0.068    |
| Absolute lycopene                  | -0.092    | 0.224    | 4.134       | 0.388    | 0.088     | 0.246    | 4.134       | 0.388    |
| Relative ascorbate                 | 0.050     | 0.173    | 5.503       | 0.939    | -0.060    | 0.119    | 5.503       | 0.939    |
| Vitamin C                          | -0.041    | 0.304    | 14.555      | 0.024    | 0.055     | 0.082    | 15.708      | 0.047    |
| Absolute retinol                   | NA        | NA       | 0.325       | 0.569    | NA        | NA       | 0.324       | 0.569    |
| Relative retinol                   | -0.035    | 0.346    | 22.186      | 0.330    | -0.007    | 0.851    | 22.186      | 0.330    |

FA, fractional order anisotropy; MD, mean diffusivity; 25OHD, 25-hydroxyvitamin D.

2. Supplementary Figures

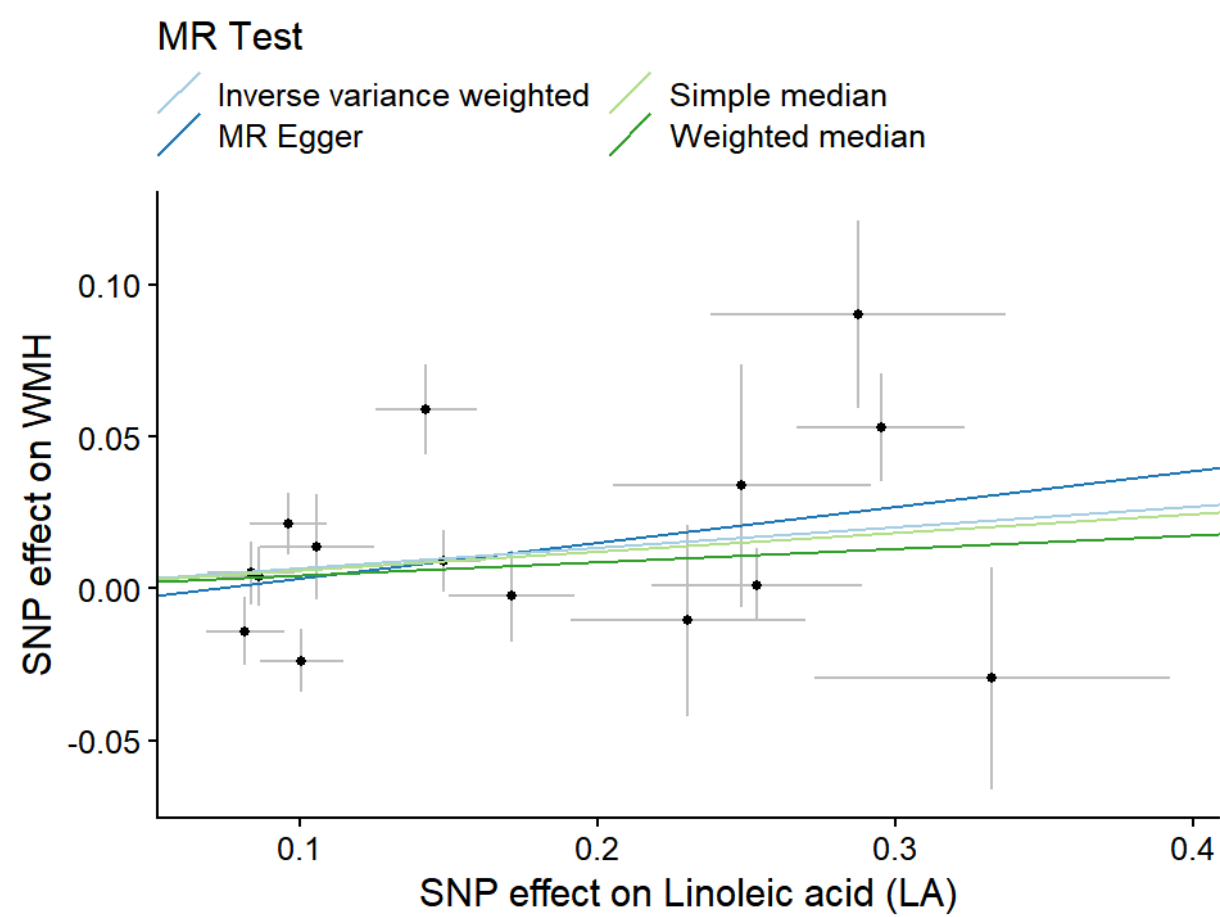

Figure S1.1 Scatterplot of Linolenic acid (LA) and WMH

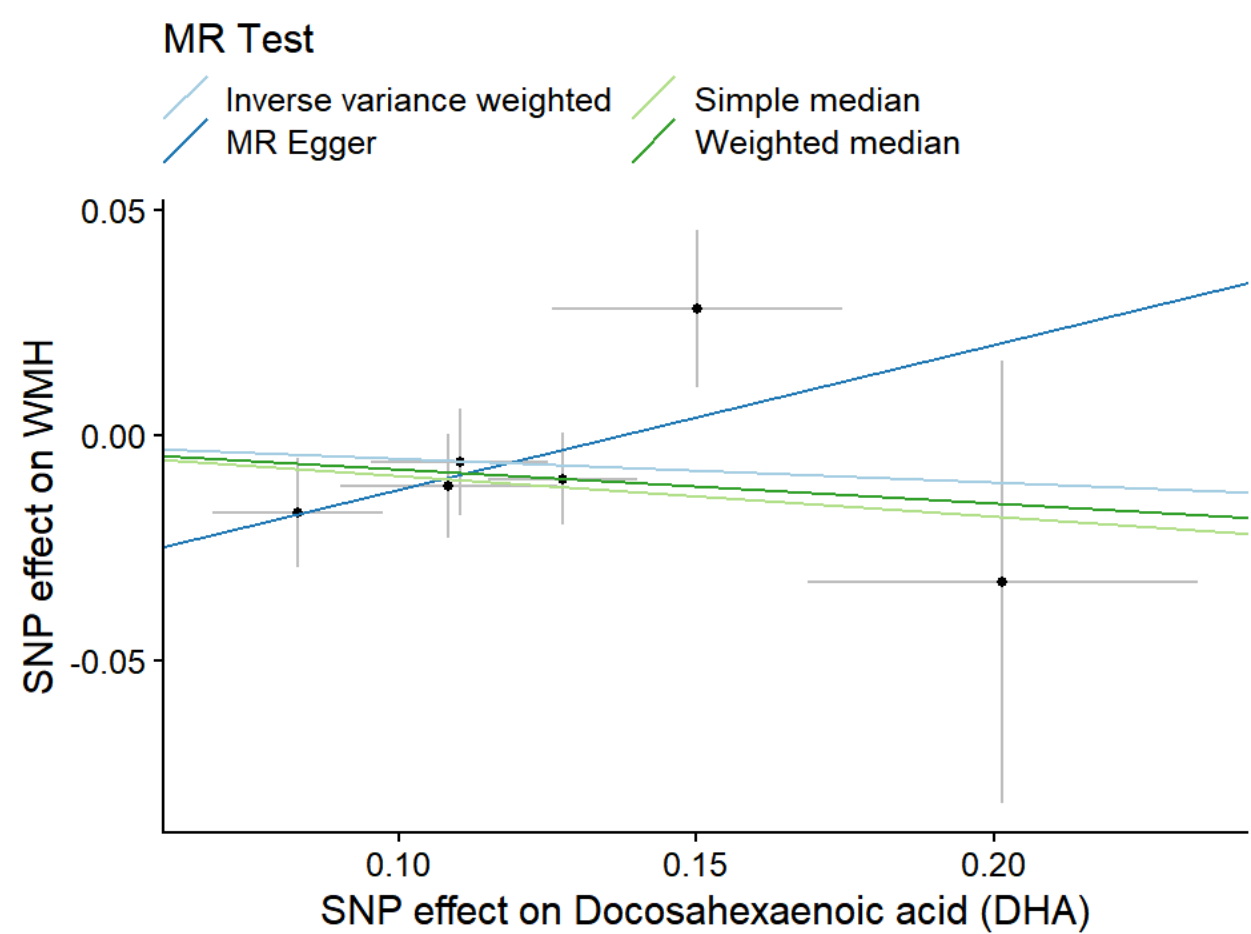

Figure S1.2 Scatterplot of docosahexaenoic acid (DHA) and WMH

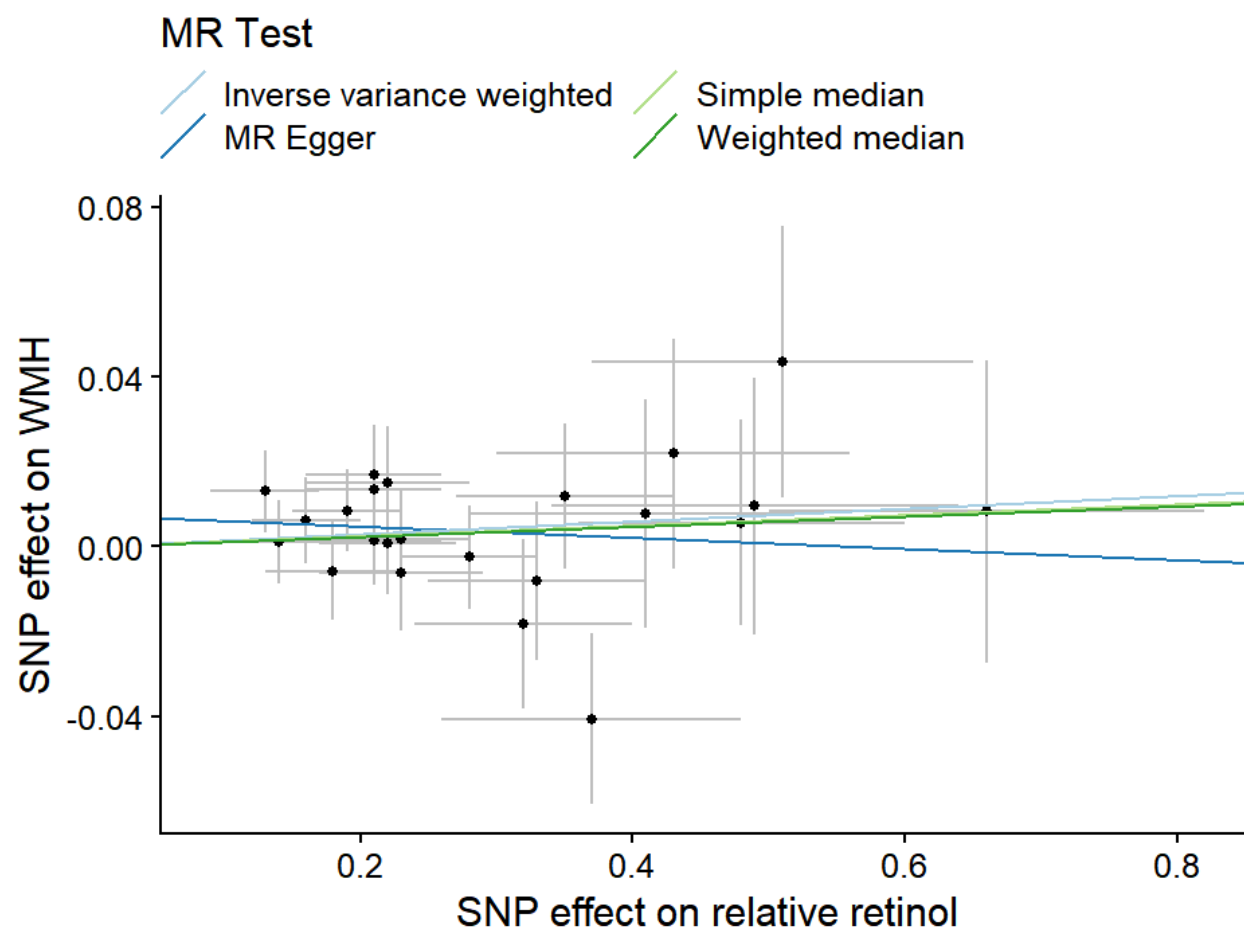

Figure S1.3 Scatterplot of relative retinol and WMH

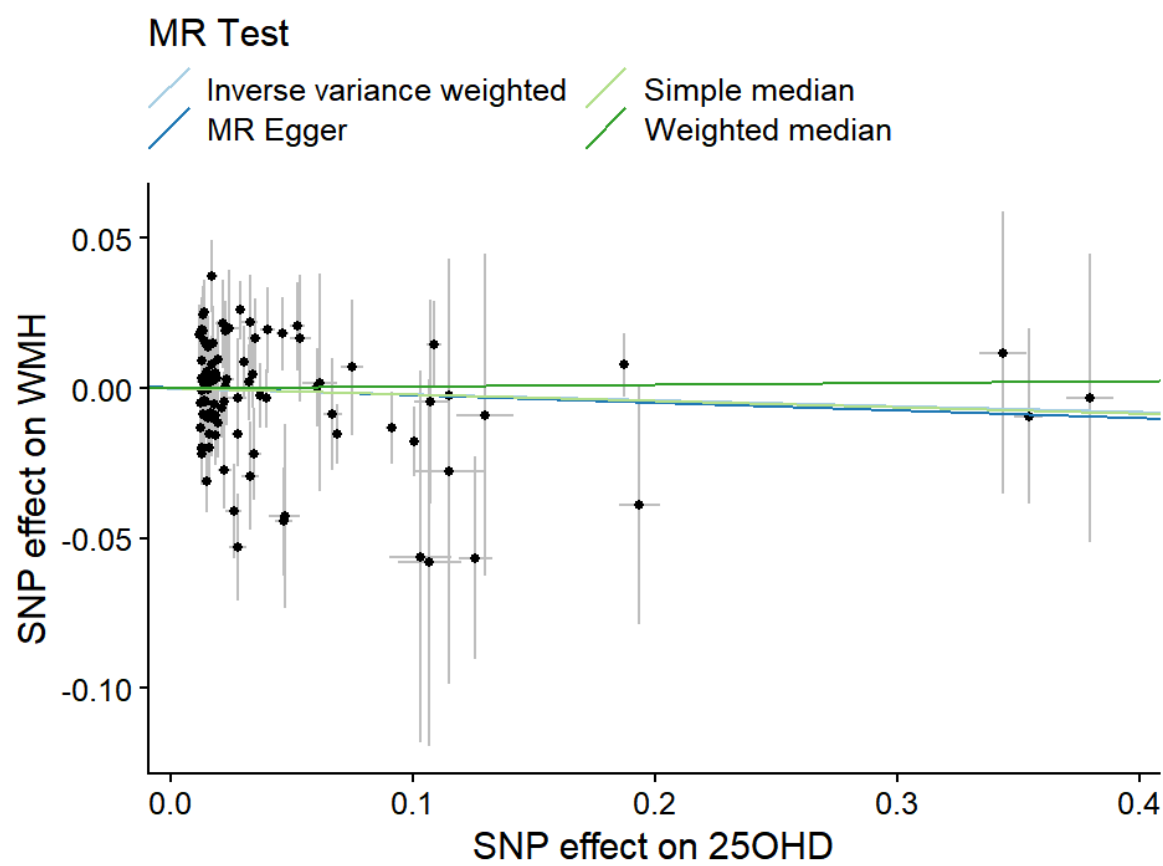

Figure S1.4 Scatterplot of 25OHD and WMH

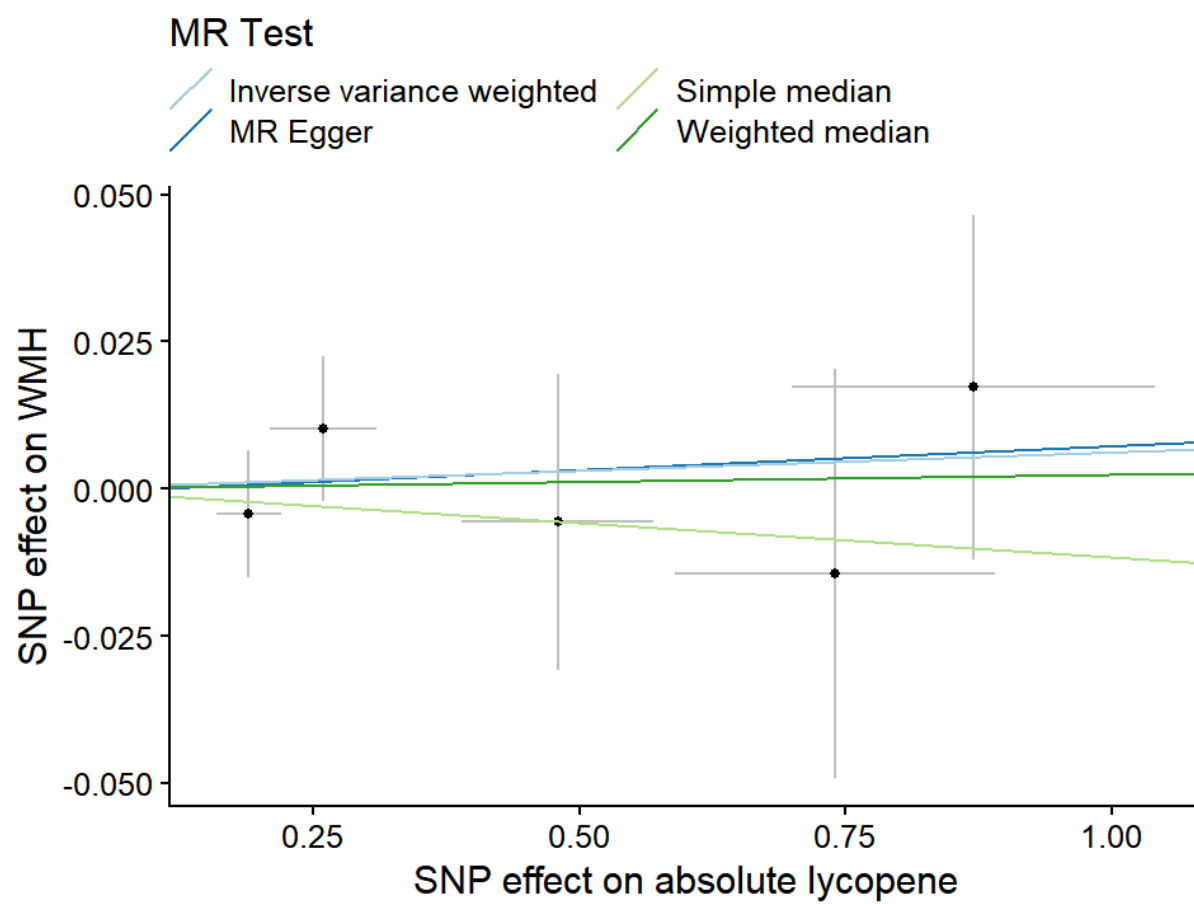

Figure S1.5 Scatterplot of absolute lycopene and WMH

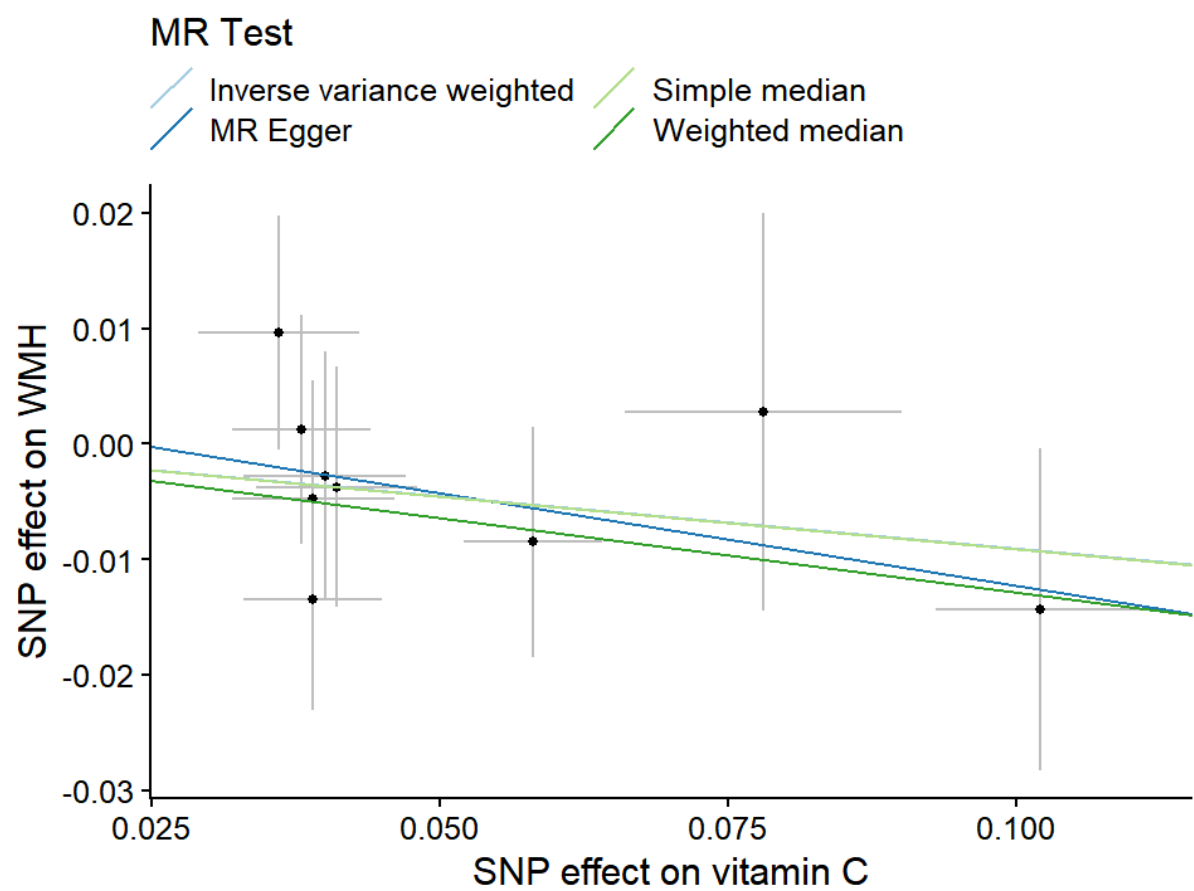

Figure S1.6 Scatterplot of vitamin C and WMH

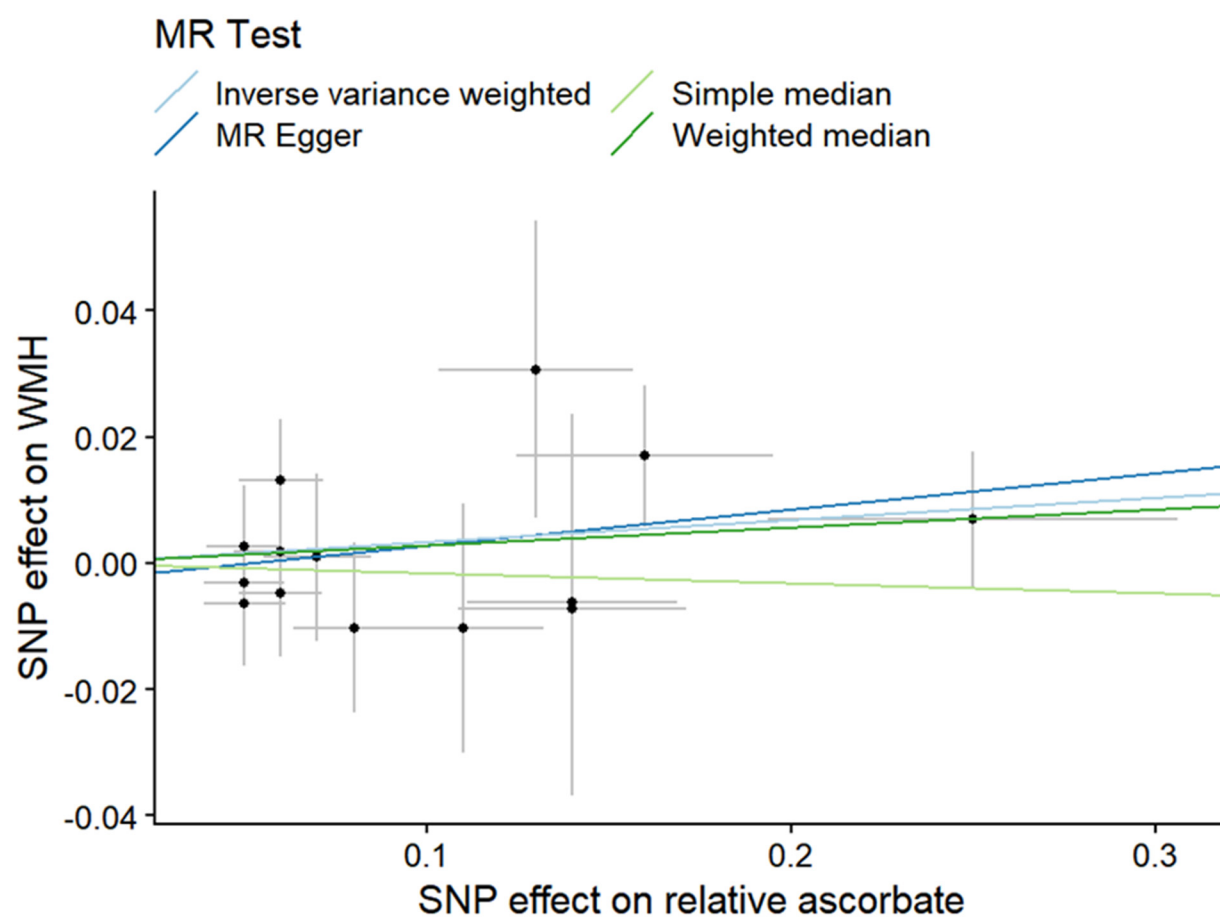

Figure S1.7 Scatterplot of relative ascorbate and WMH

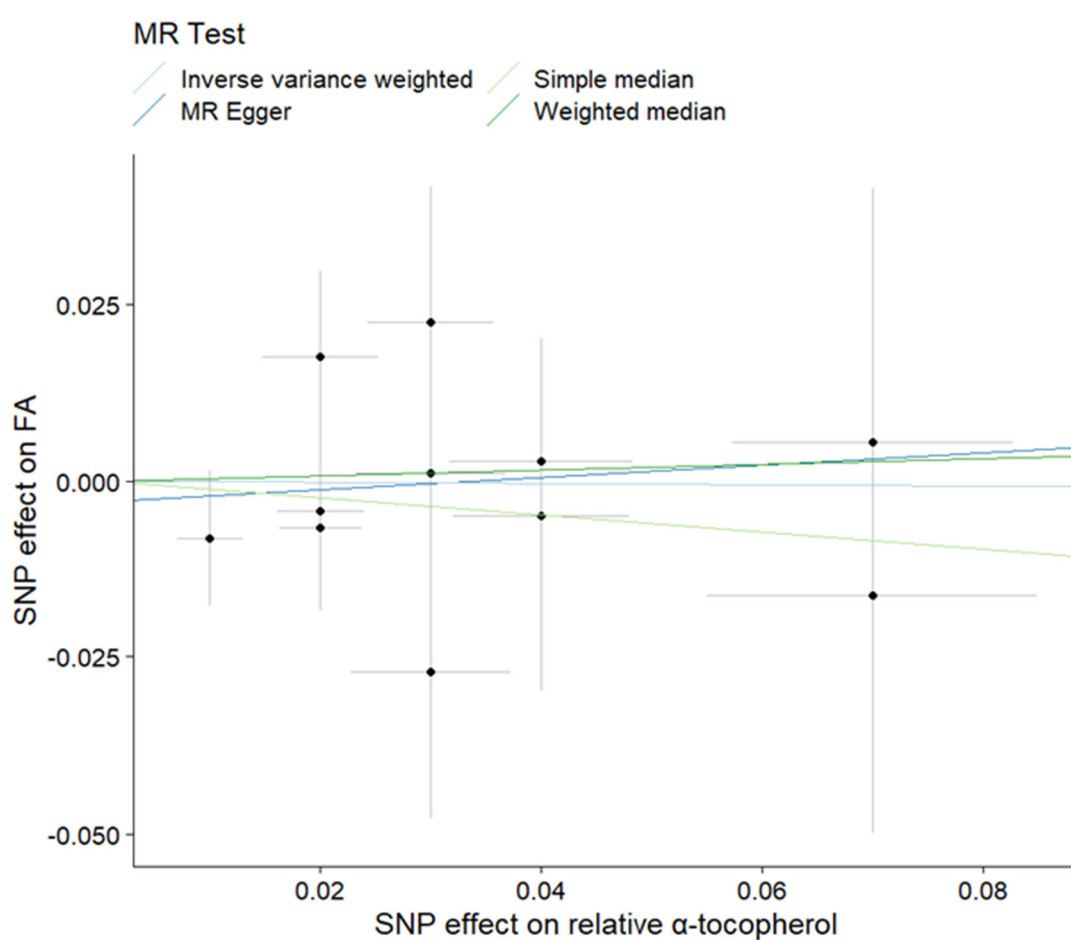

Figure S1.8 Scatterplot of relative  $\alpha$ -tocopherol and WMH



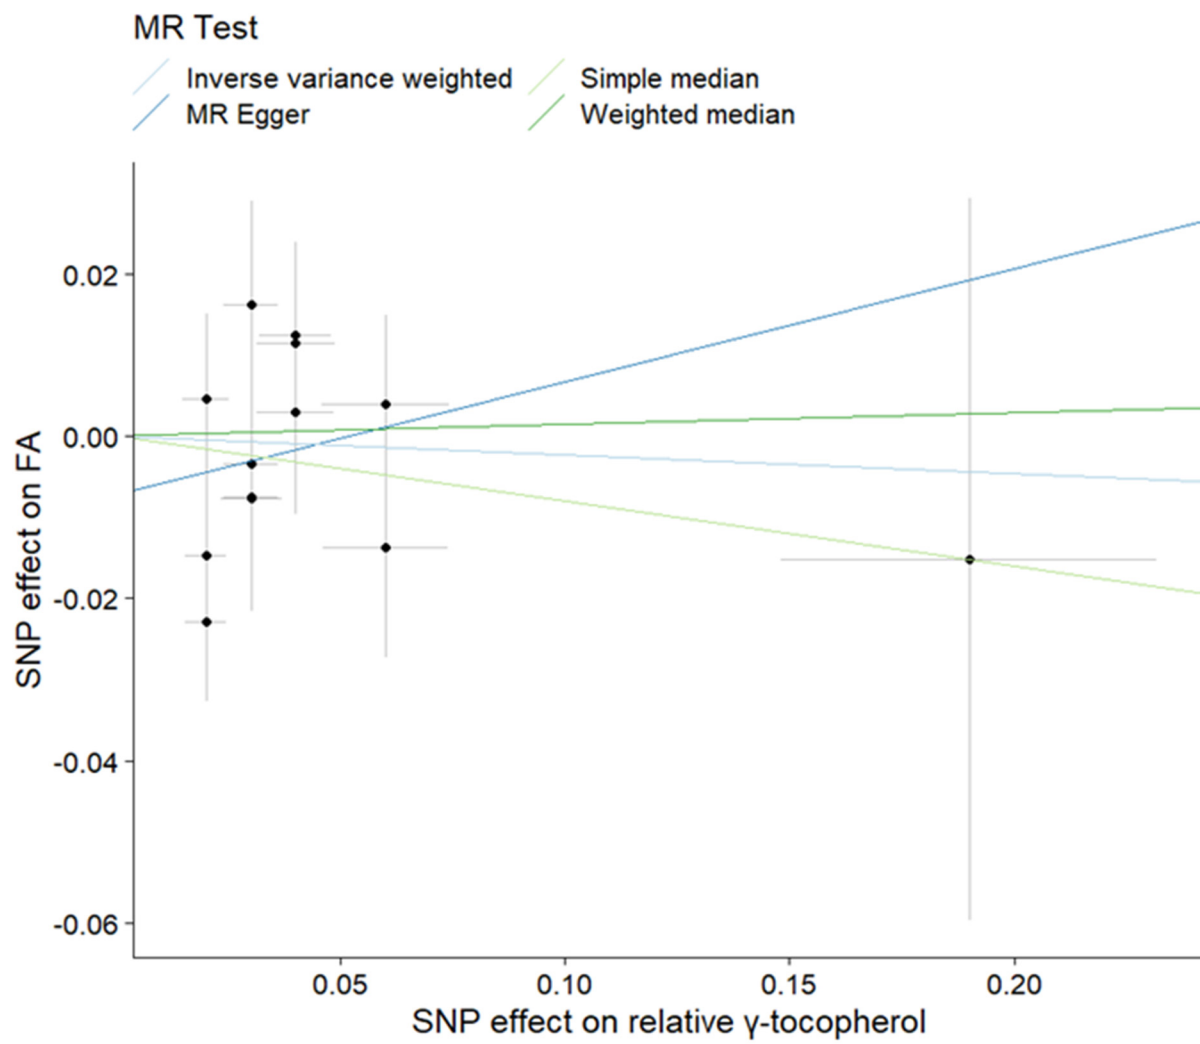

Figure S1.9 Scatterplot of relative  $\gamma$ -tocopherol and WMH

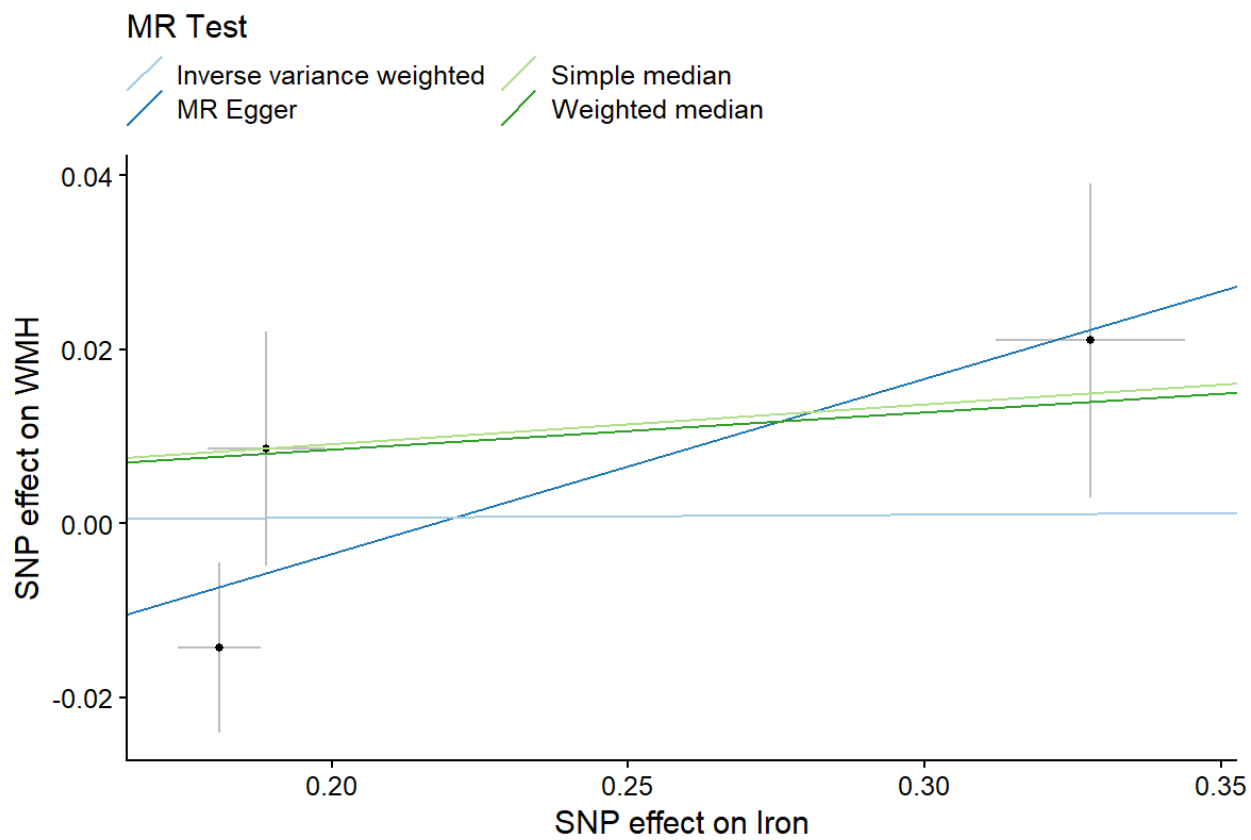

Figure S1.10 Scatterplot of iron and WMH

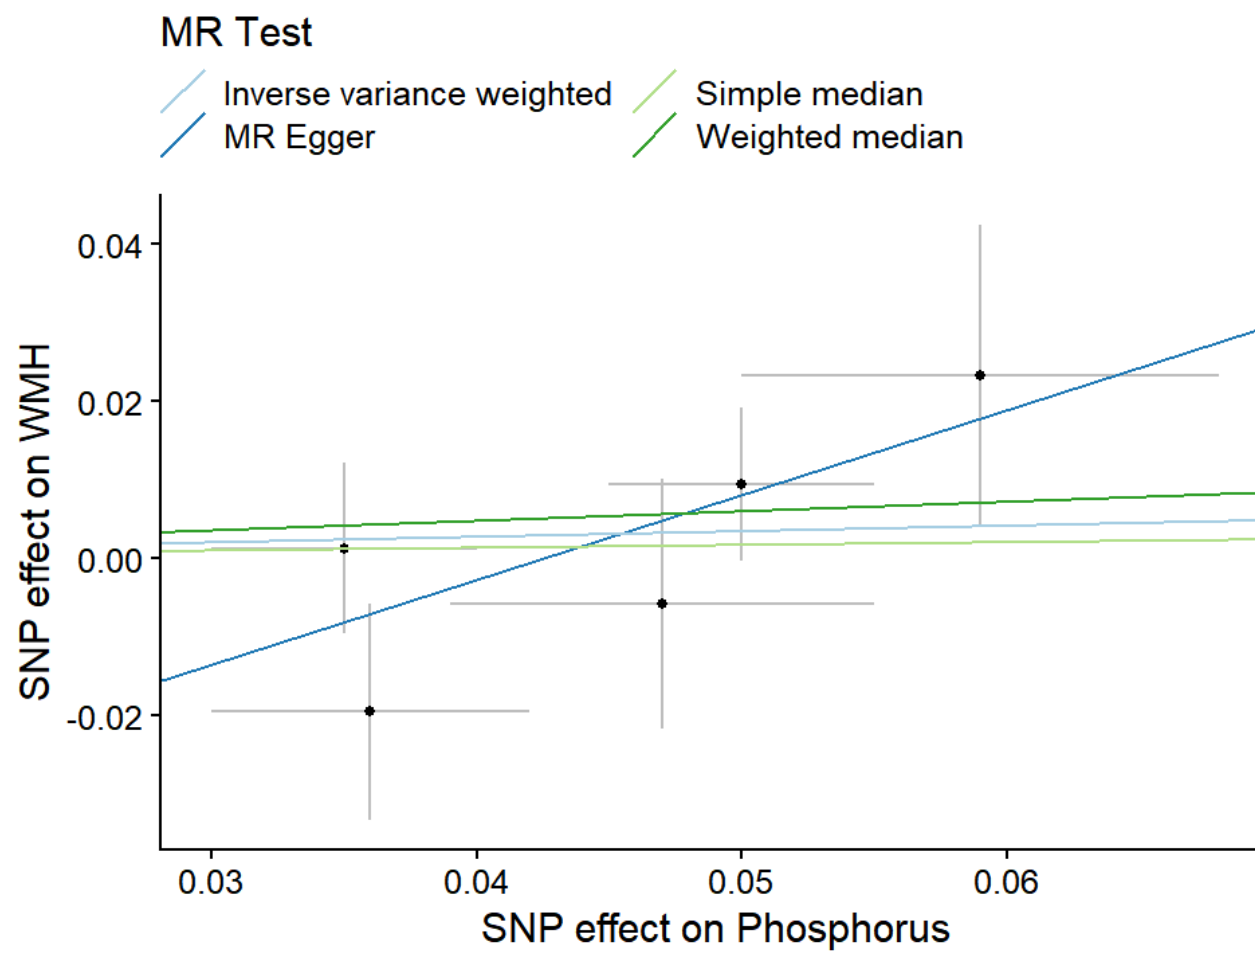

Figure S1.11 Scatterplot of phosphorus and WMH

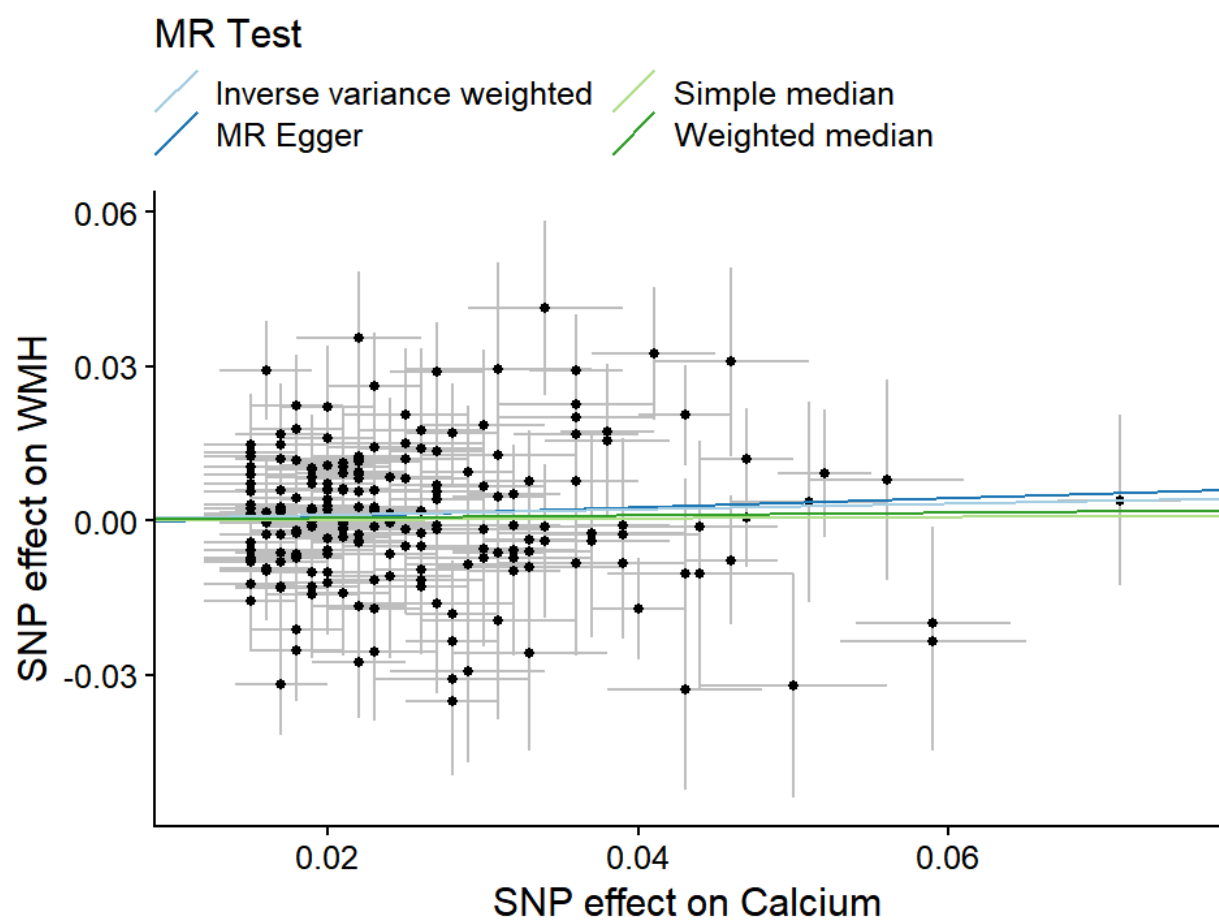

Figure S1.12 Scatterplot of calcium and WMH

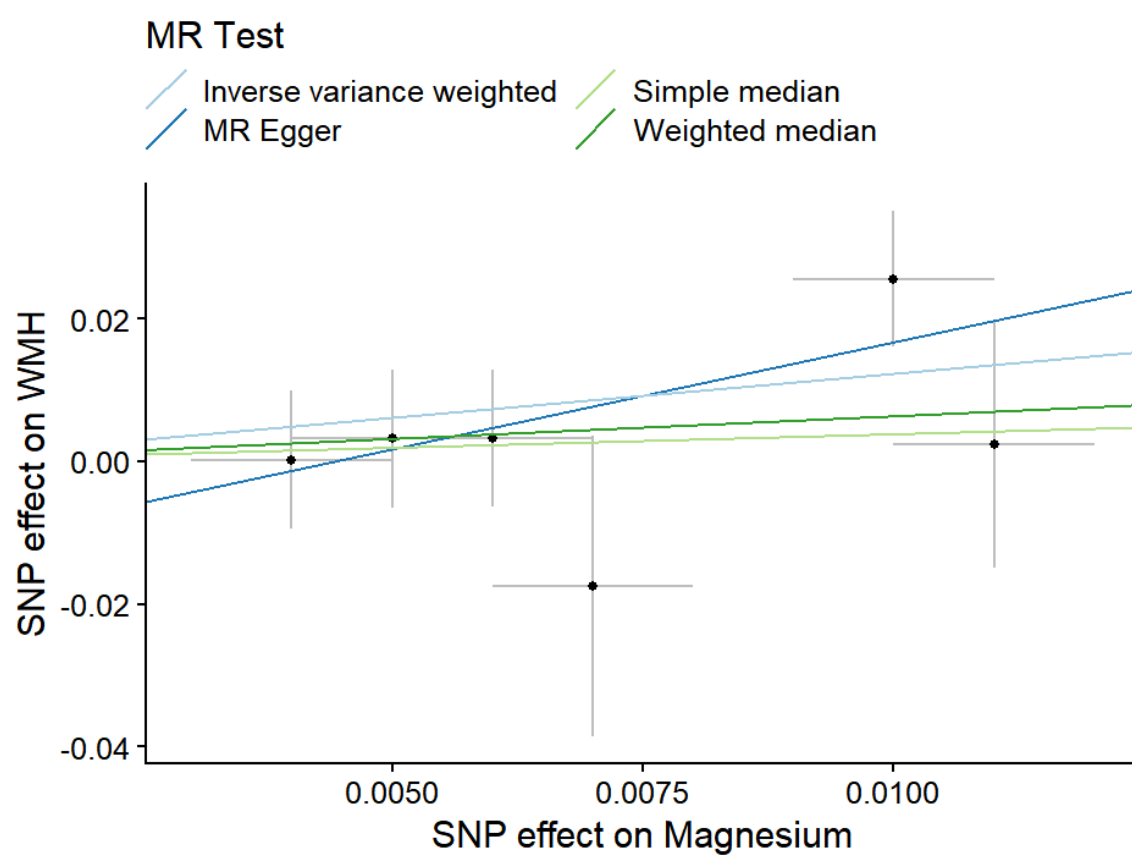

Figure S1.13 Scatterplot of magnesium and WMH

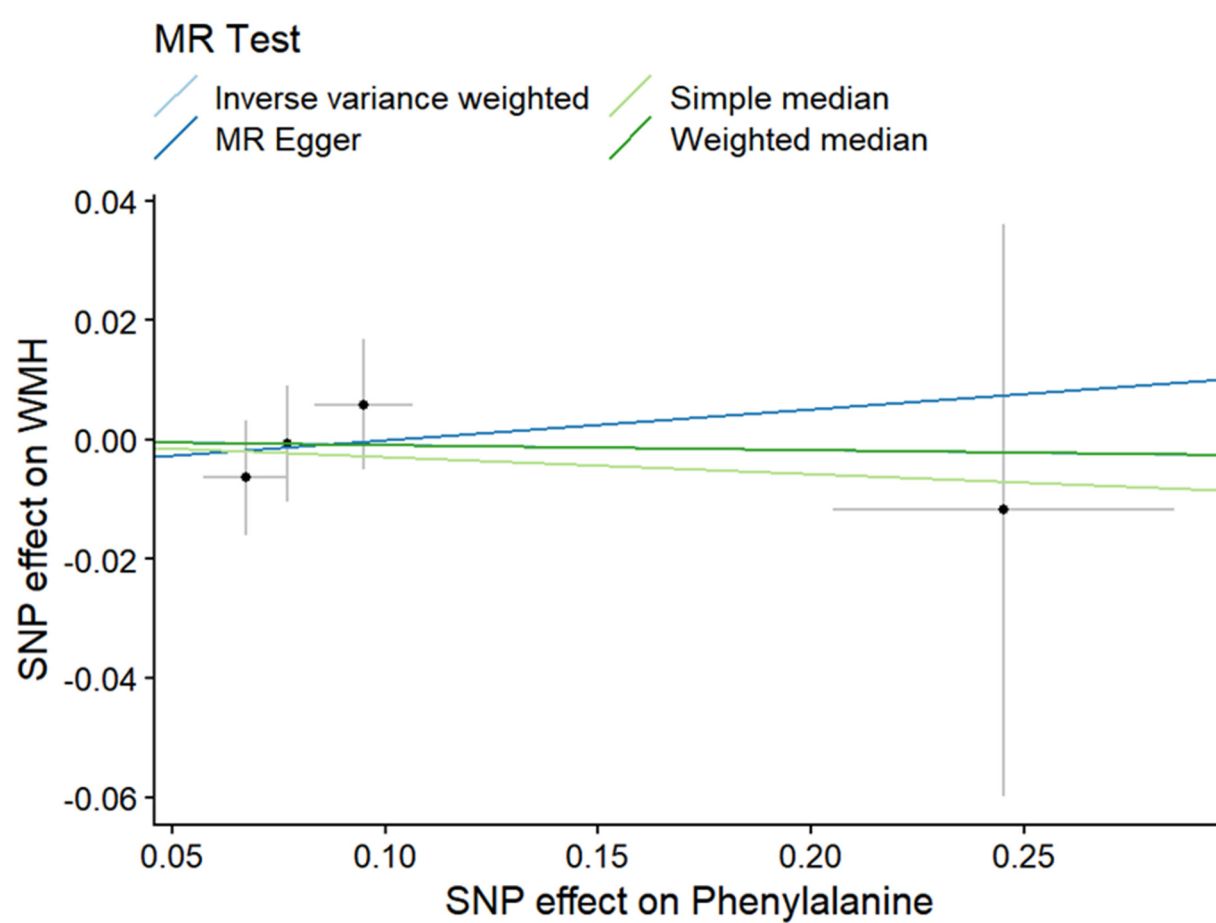

Figure S1.14 Scatterplot of phenylalanine and WMH

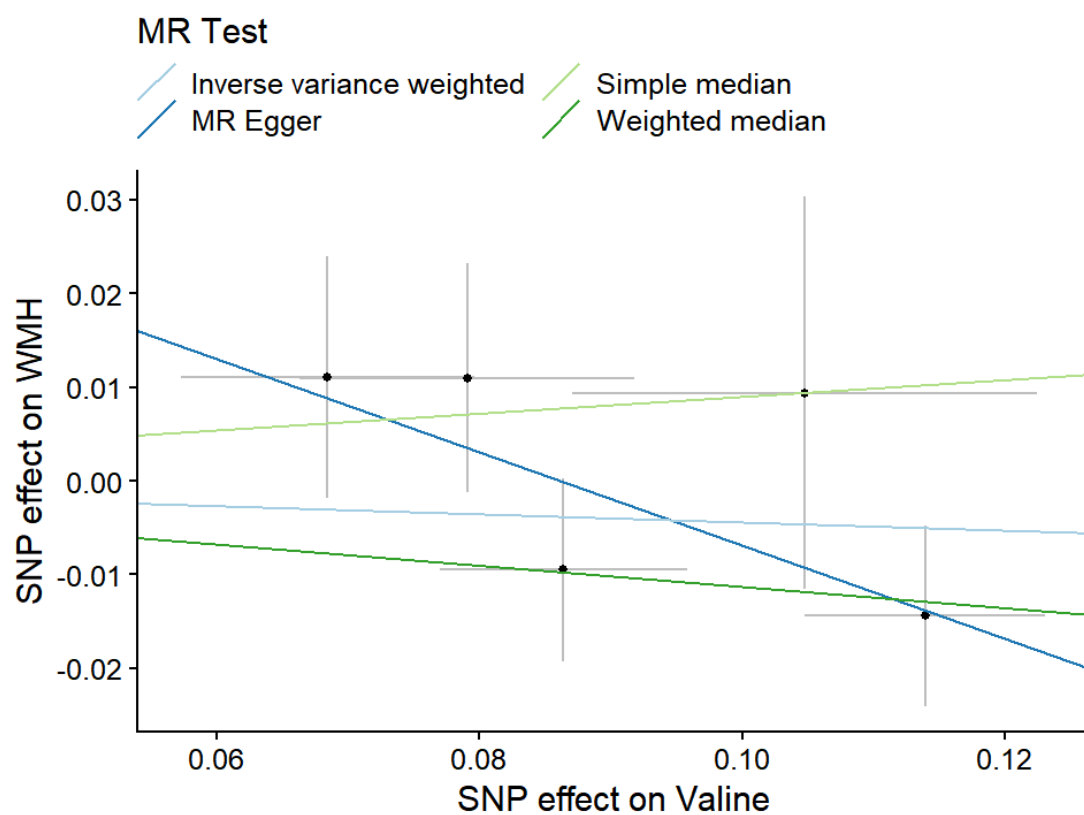

Figure S1.15 Scatterplot of valine and WMH

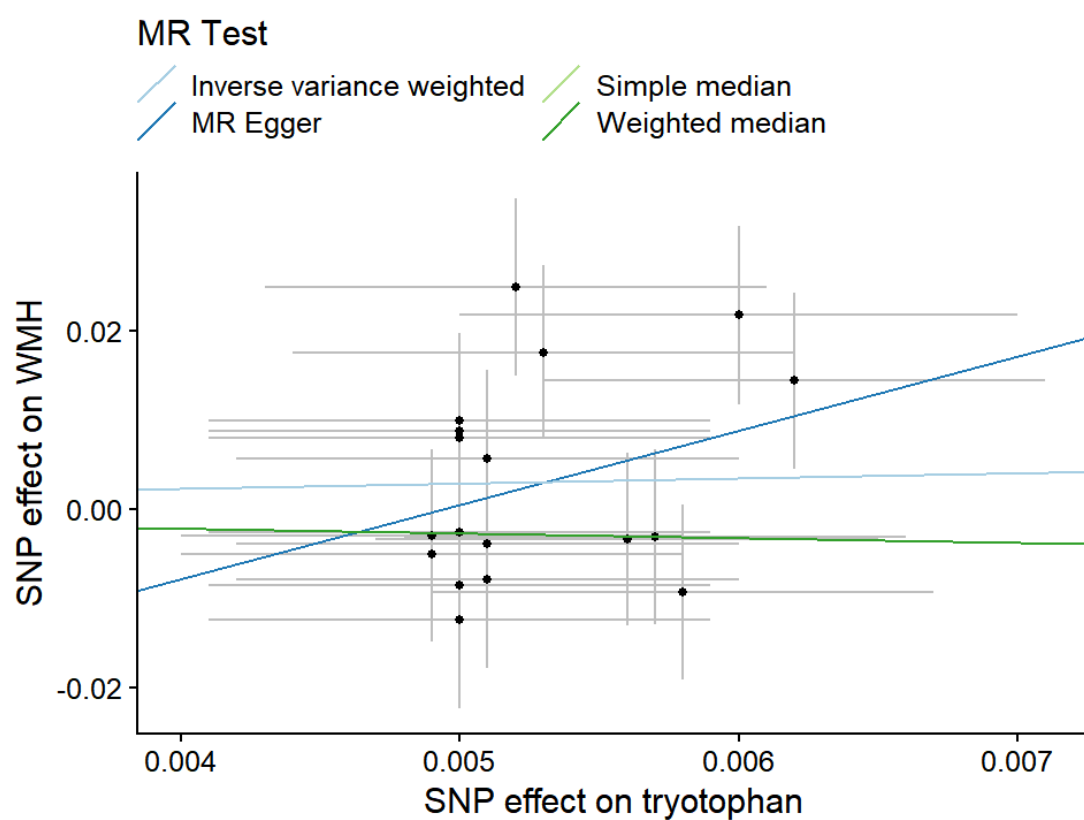

Figure S1.16 Scatterplot of tryptophan and WMH

**Figure S1.** Scatterplots of essential nutrients exposures and WMH. The x-axis represents the previously published  $\beta$ -estimate for the association between each SNP and essential nutrients. The y-axis represents the  $\beta$ -estimate for the association between each SNP and risk of cerebral hemorrhage. The slope of each line corresponds to the estimated MR effect per method.

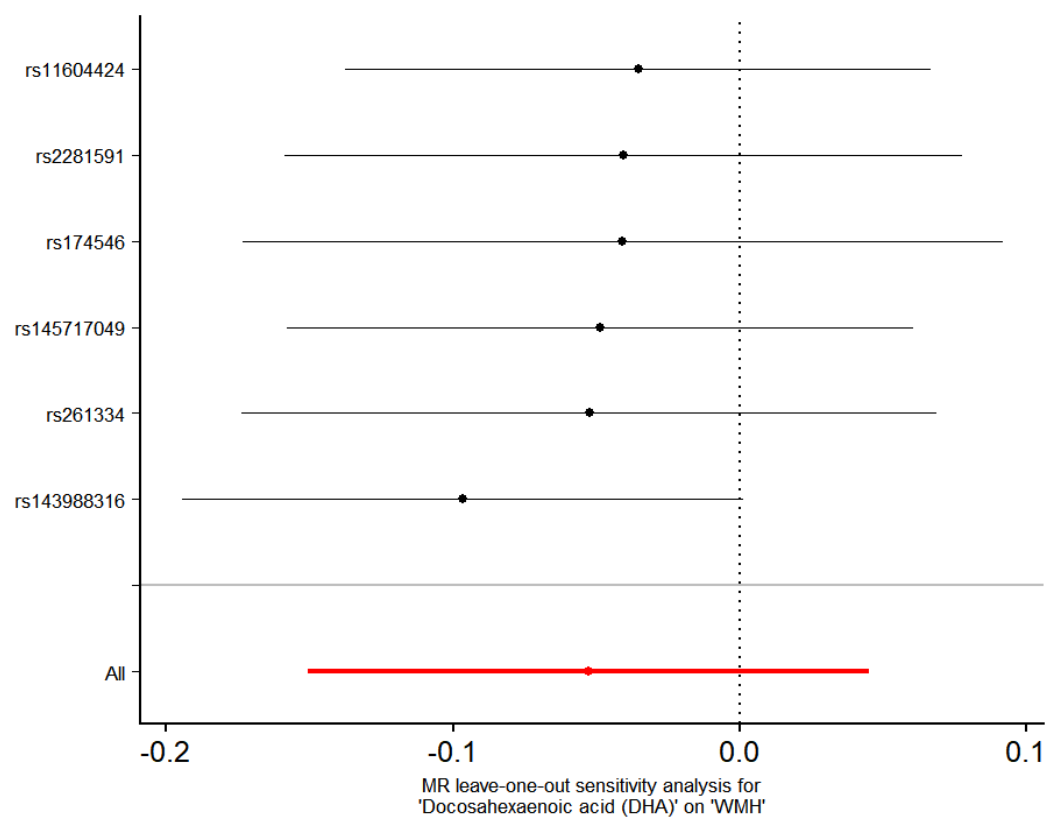

**Figure S2.1 Leave-one-out plot of docosahexaenoic acid(DHA)and WMH**

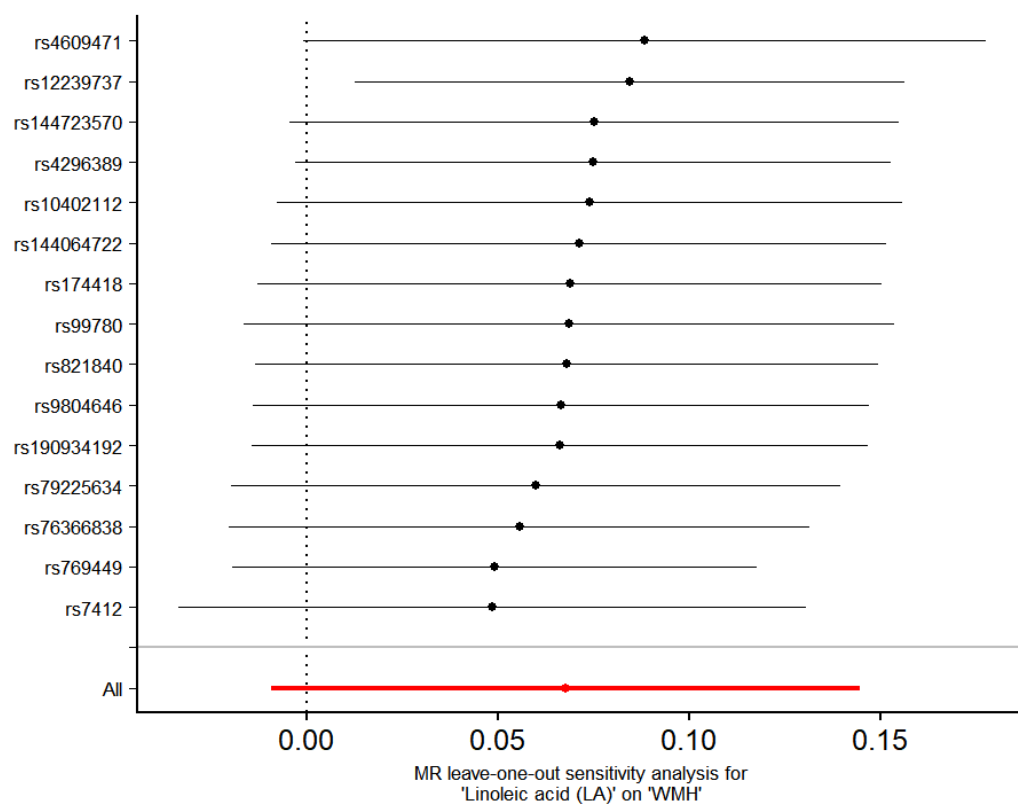

**Figure S2.2 Leave-one-out plot of linolenic acid and WMH**

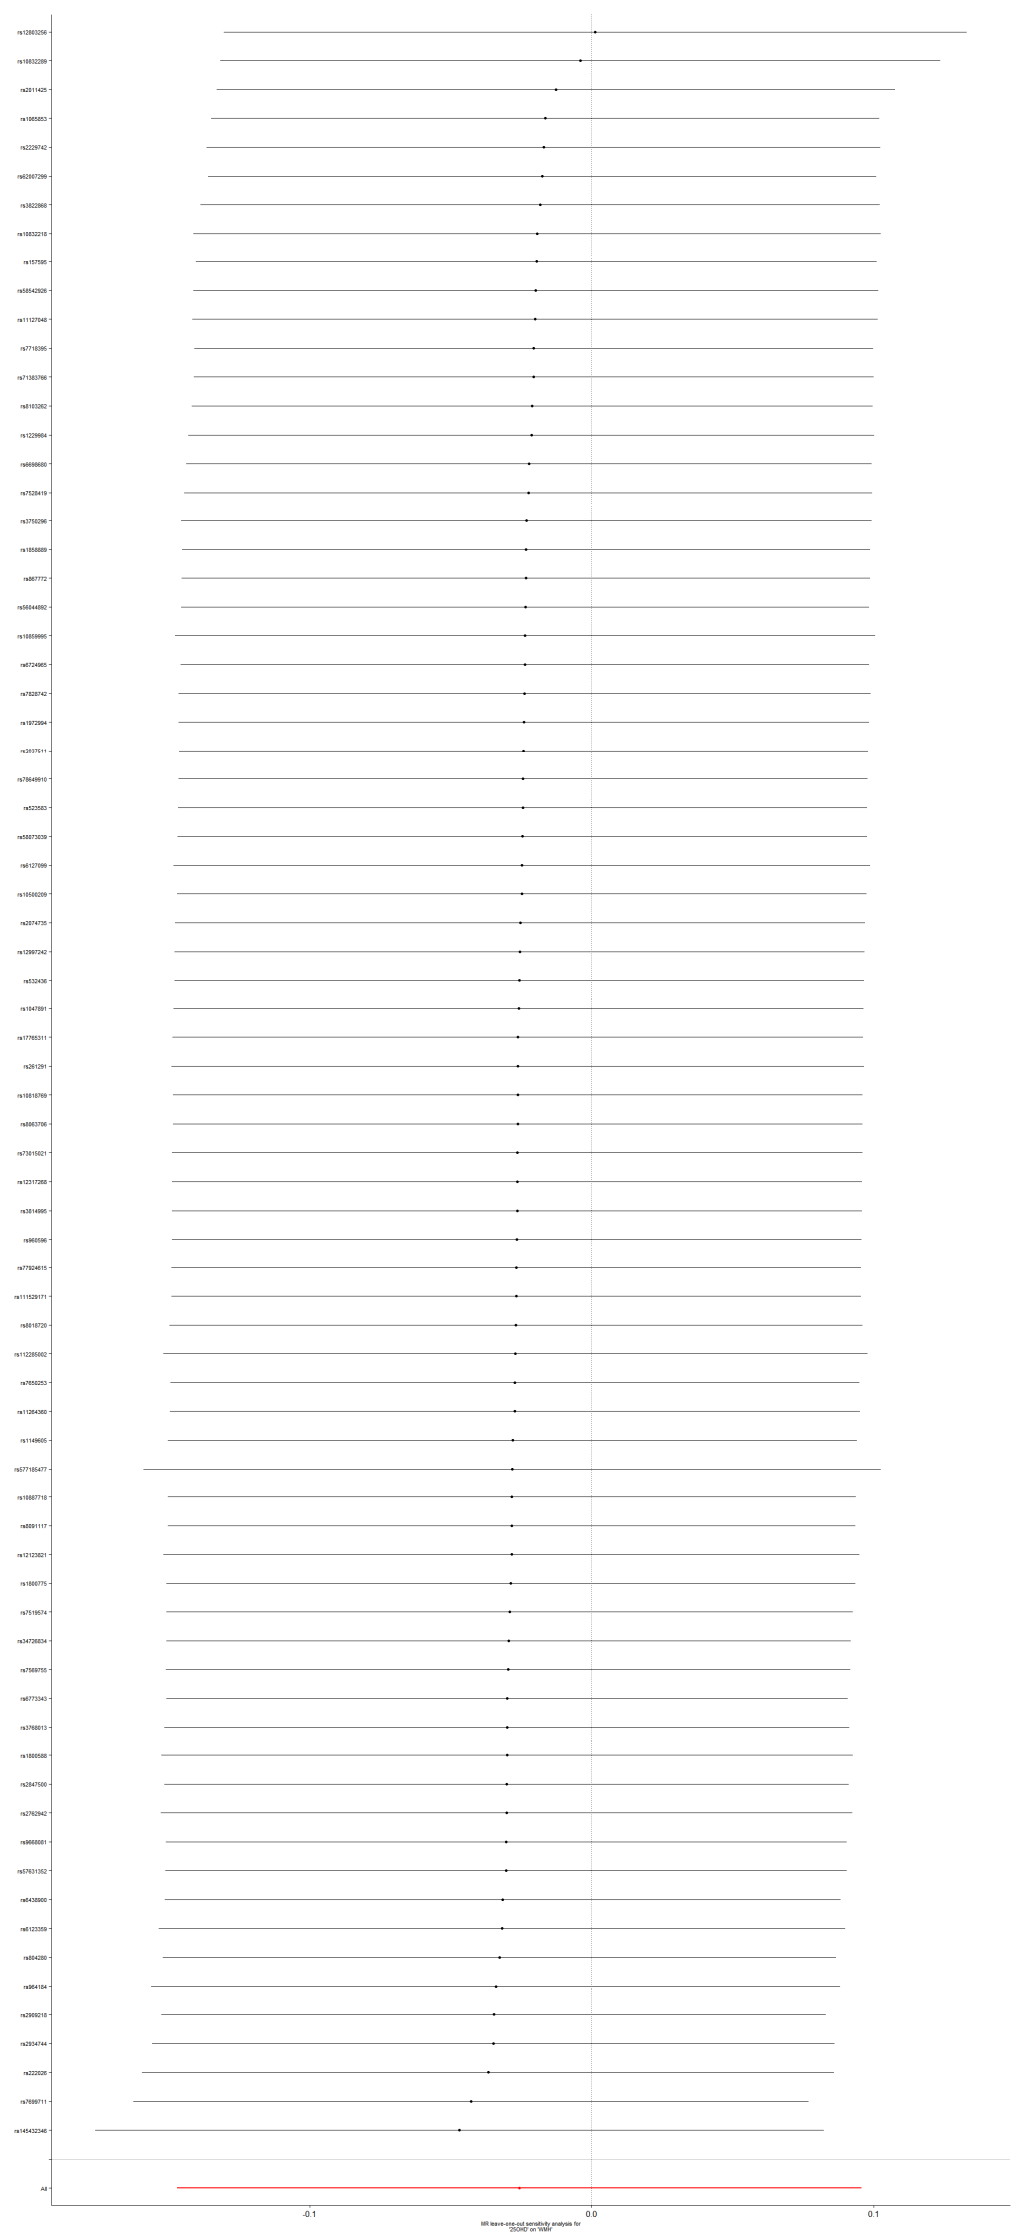

Figure S2.3 Leave-one-out plot of 25OHD and WMH

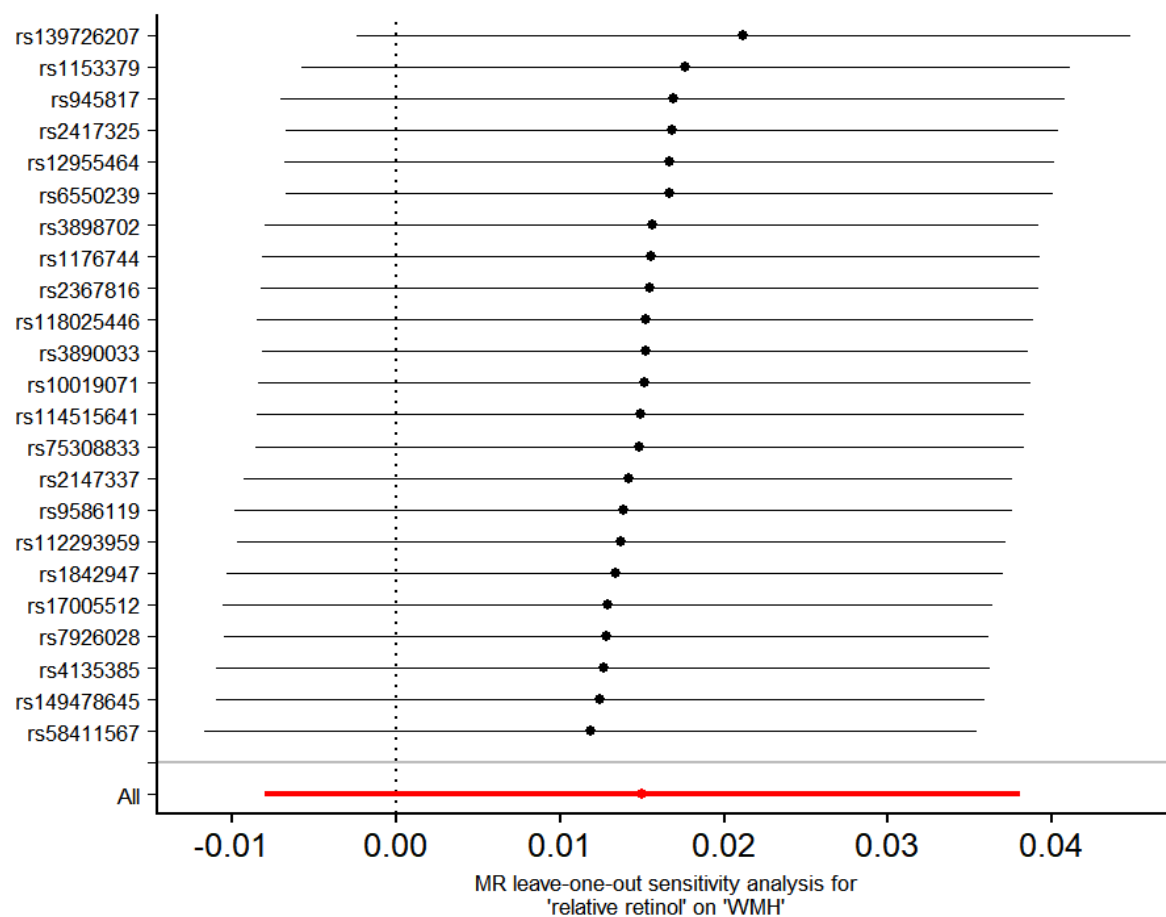

**Figure S2.4 Leave-one-out plot of relative retinol and WMH**

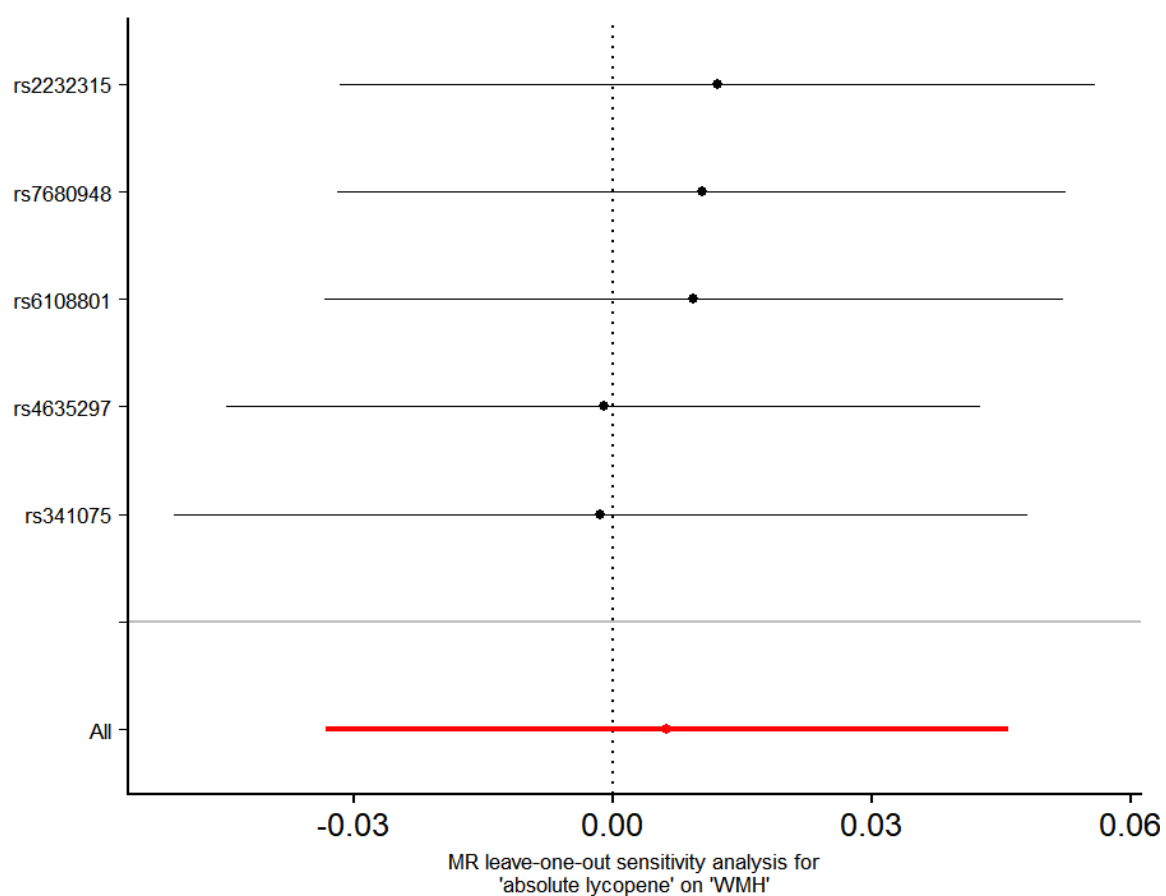

**Figure S2.5 Leave-one-out plot of absolute lycopene and WMH**

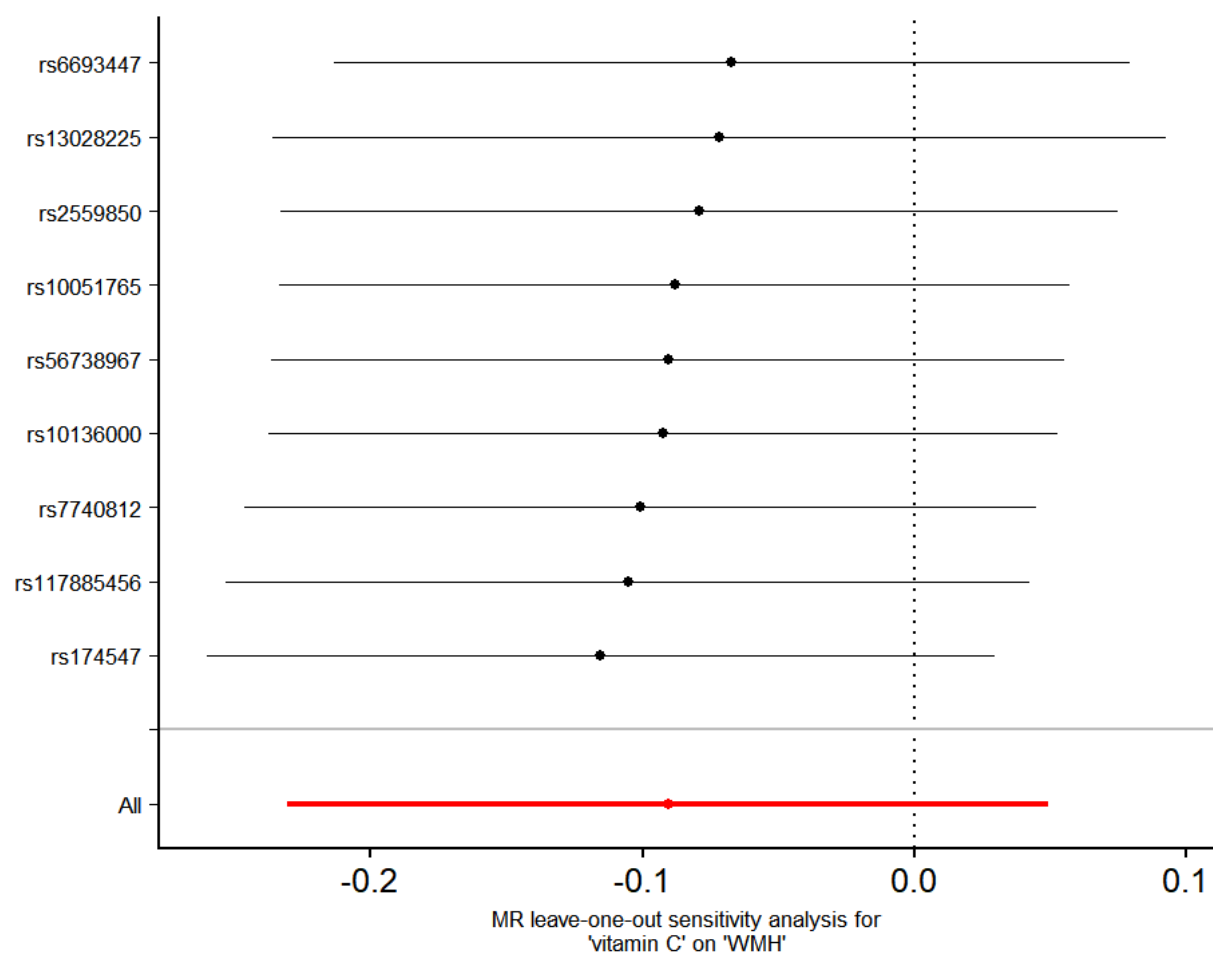

Figure S2.6 Leave-one-out plot OF vitamin C and WMH

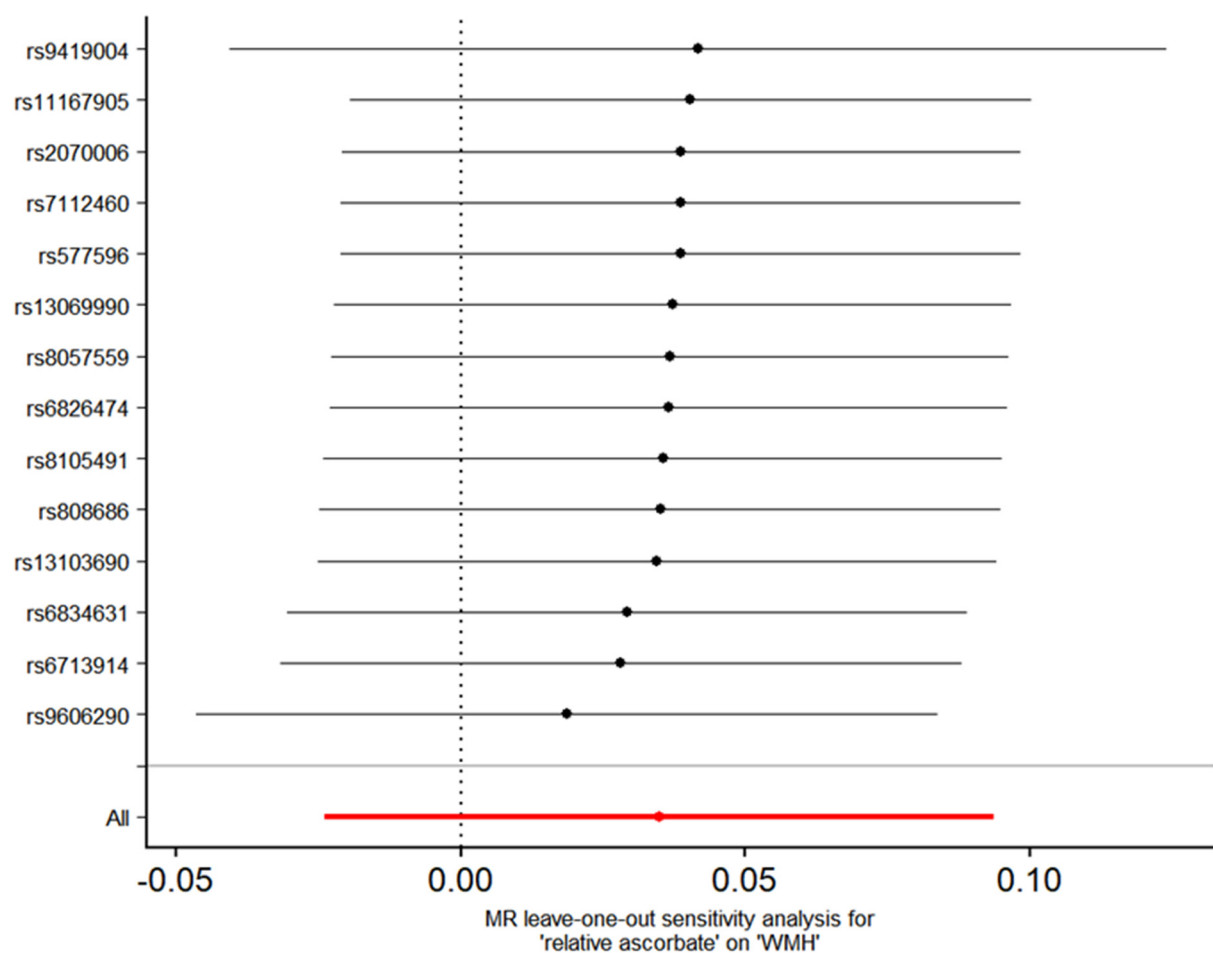

Figure S2.7 Leave-one-out plot OF relative ascorbate and WMH



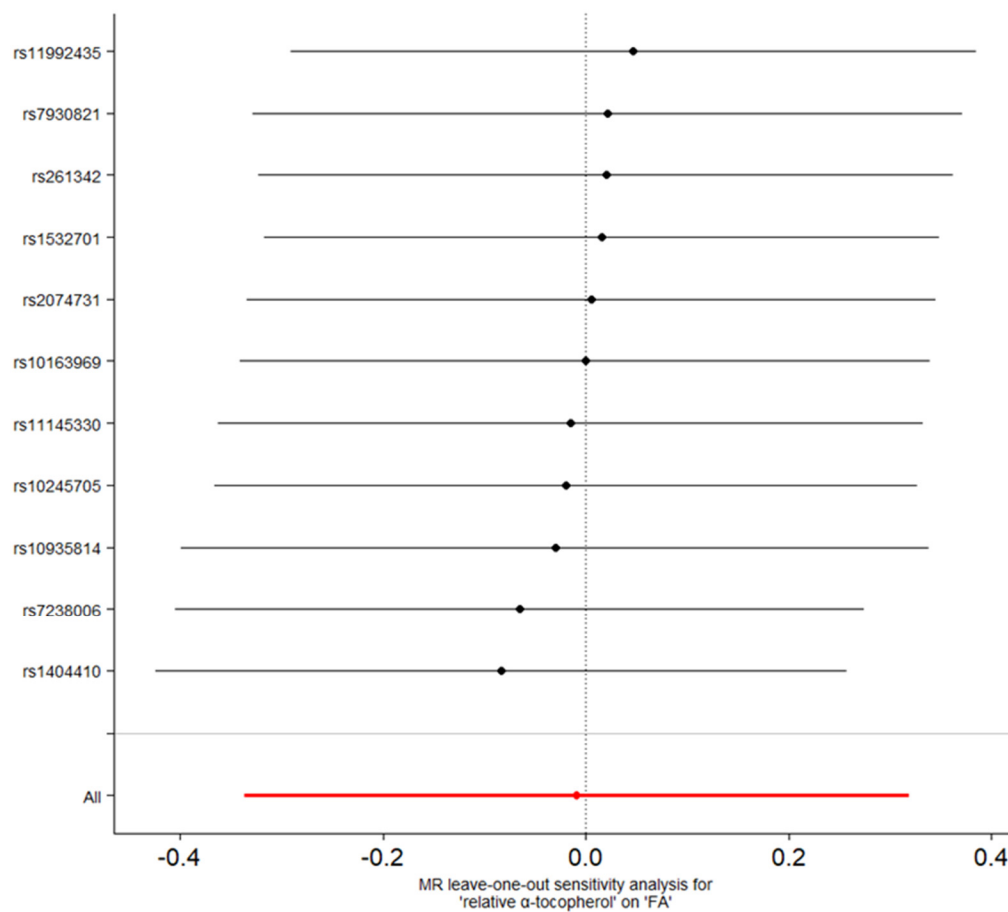

**Figure S2.8** Leave-one-out plot of relative  $\alpha$ -tocopherol and WMH

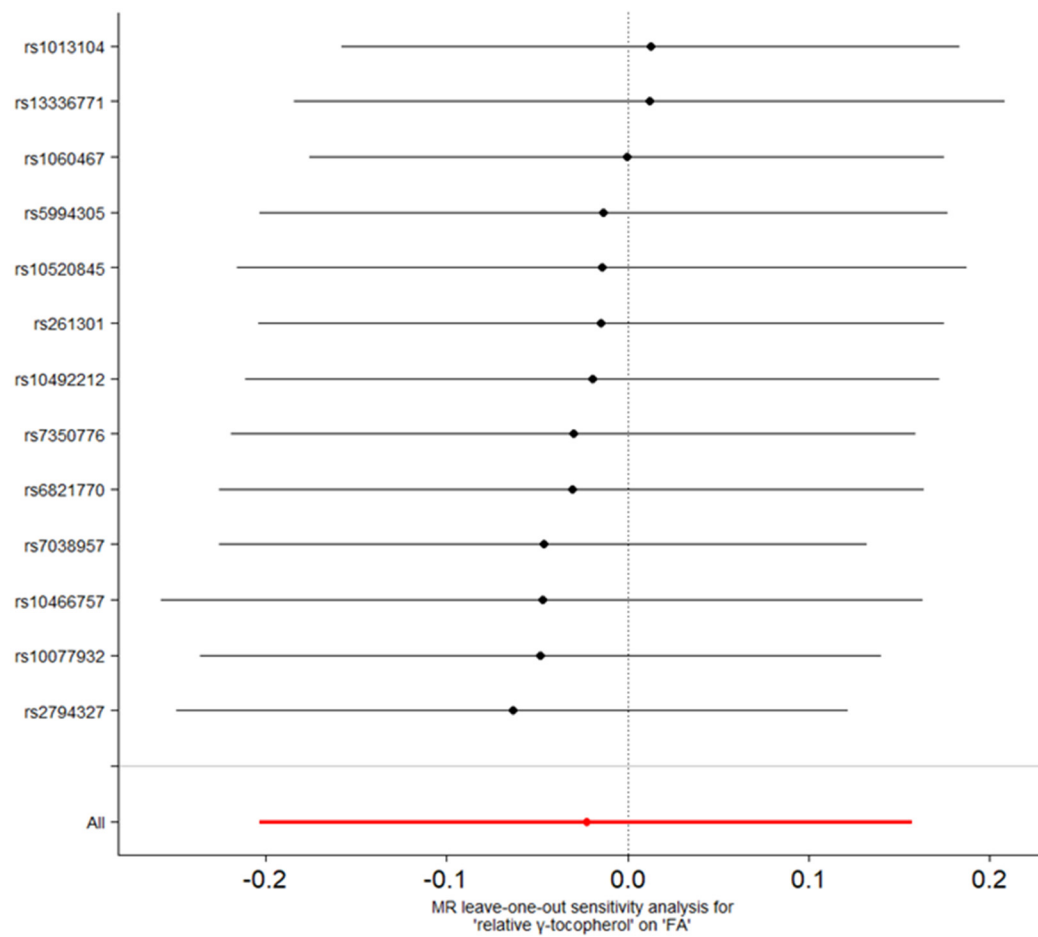

**Figure S2.9** Leave-one-out plot of relative  $\gamma$ -tocopherol and WMH

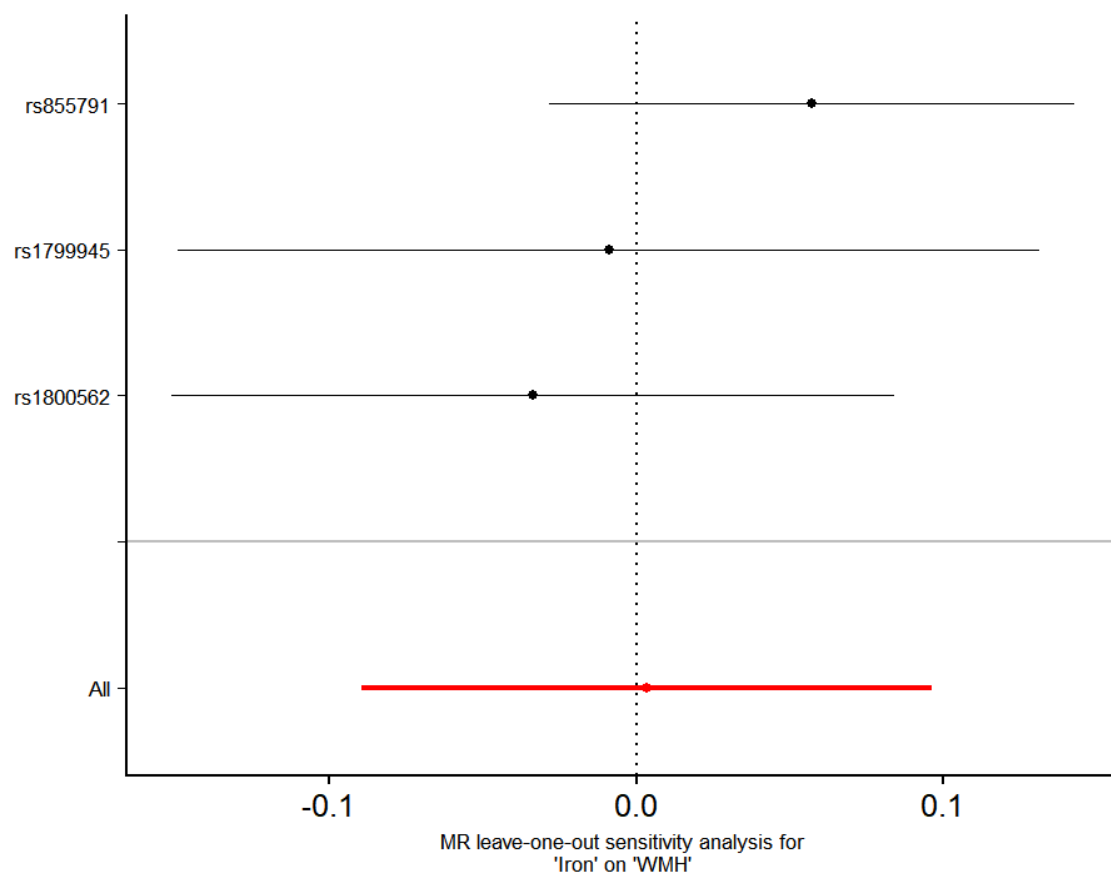

**Figure S2.10** Leave-one-out plot of iron and WMH

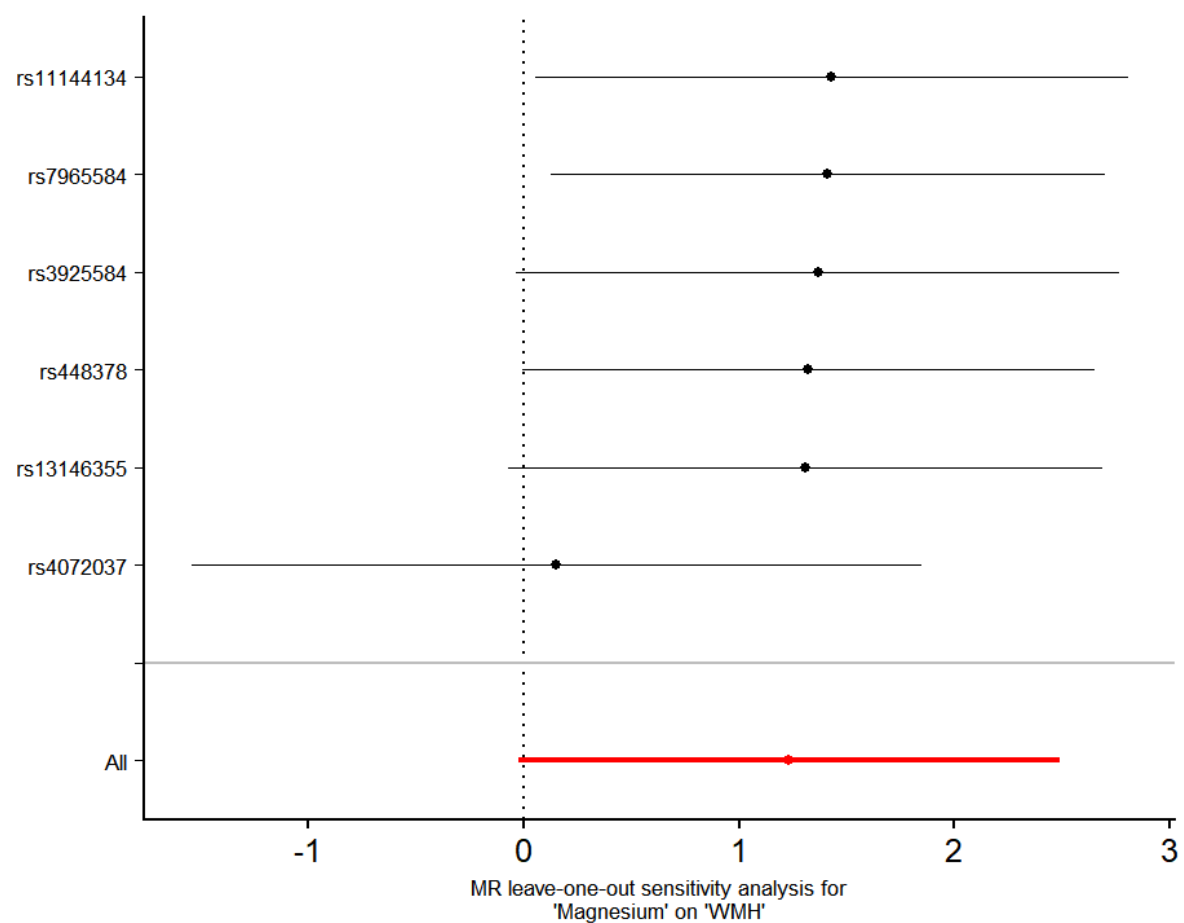

**Figure S2.11** Leave-one-out plot of magnesium and WMH

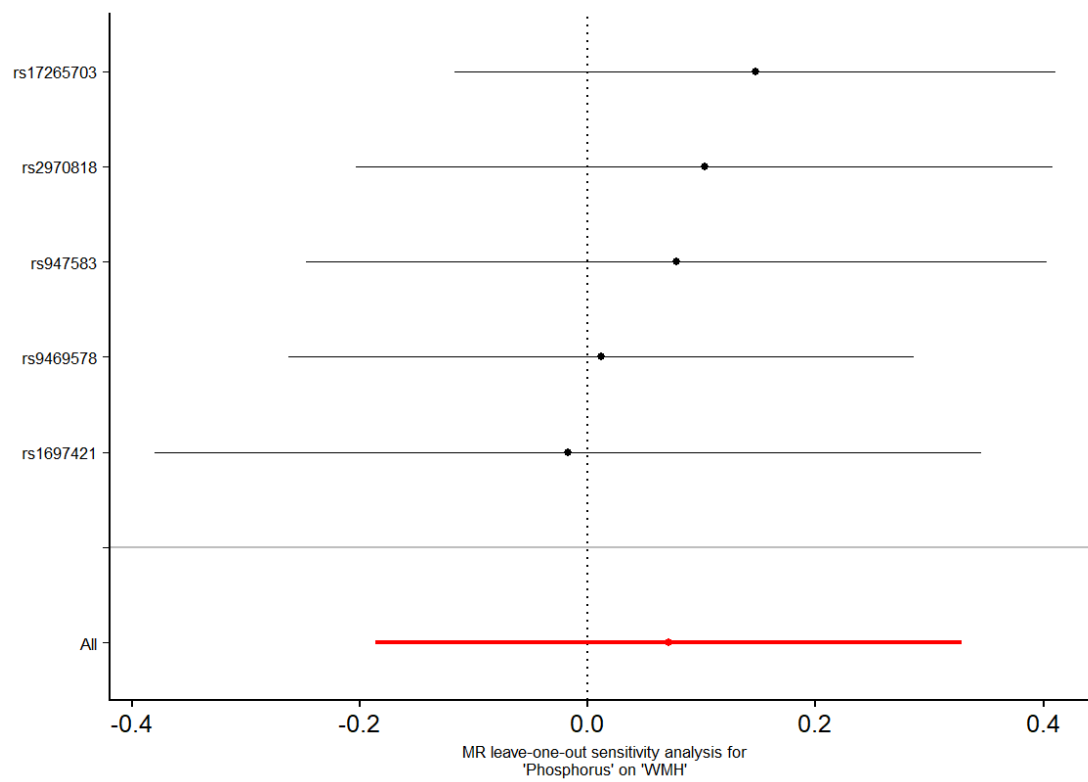

**Figure S2.12 Leave-one-out plot of phosphorus and WMH**

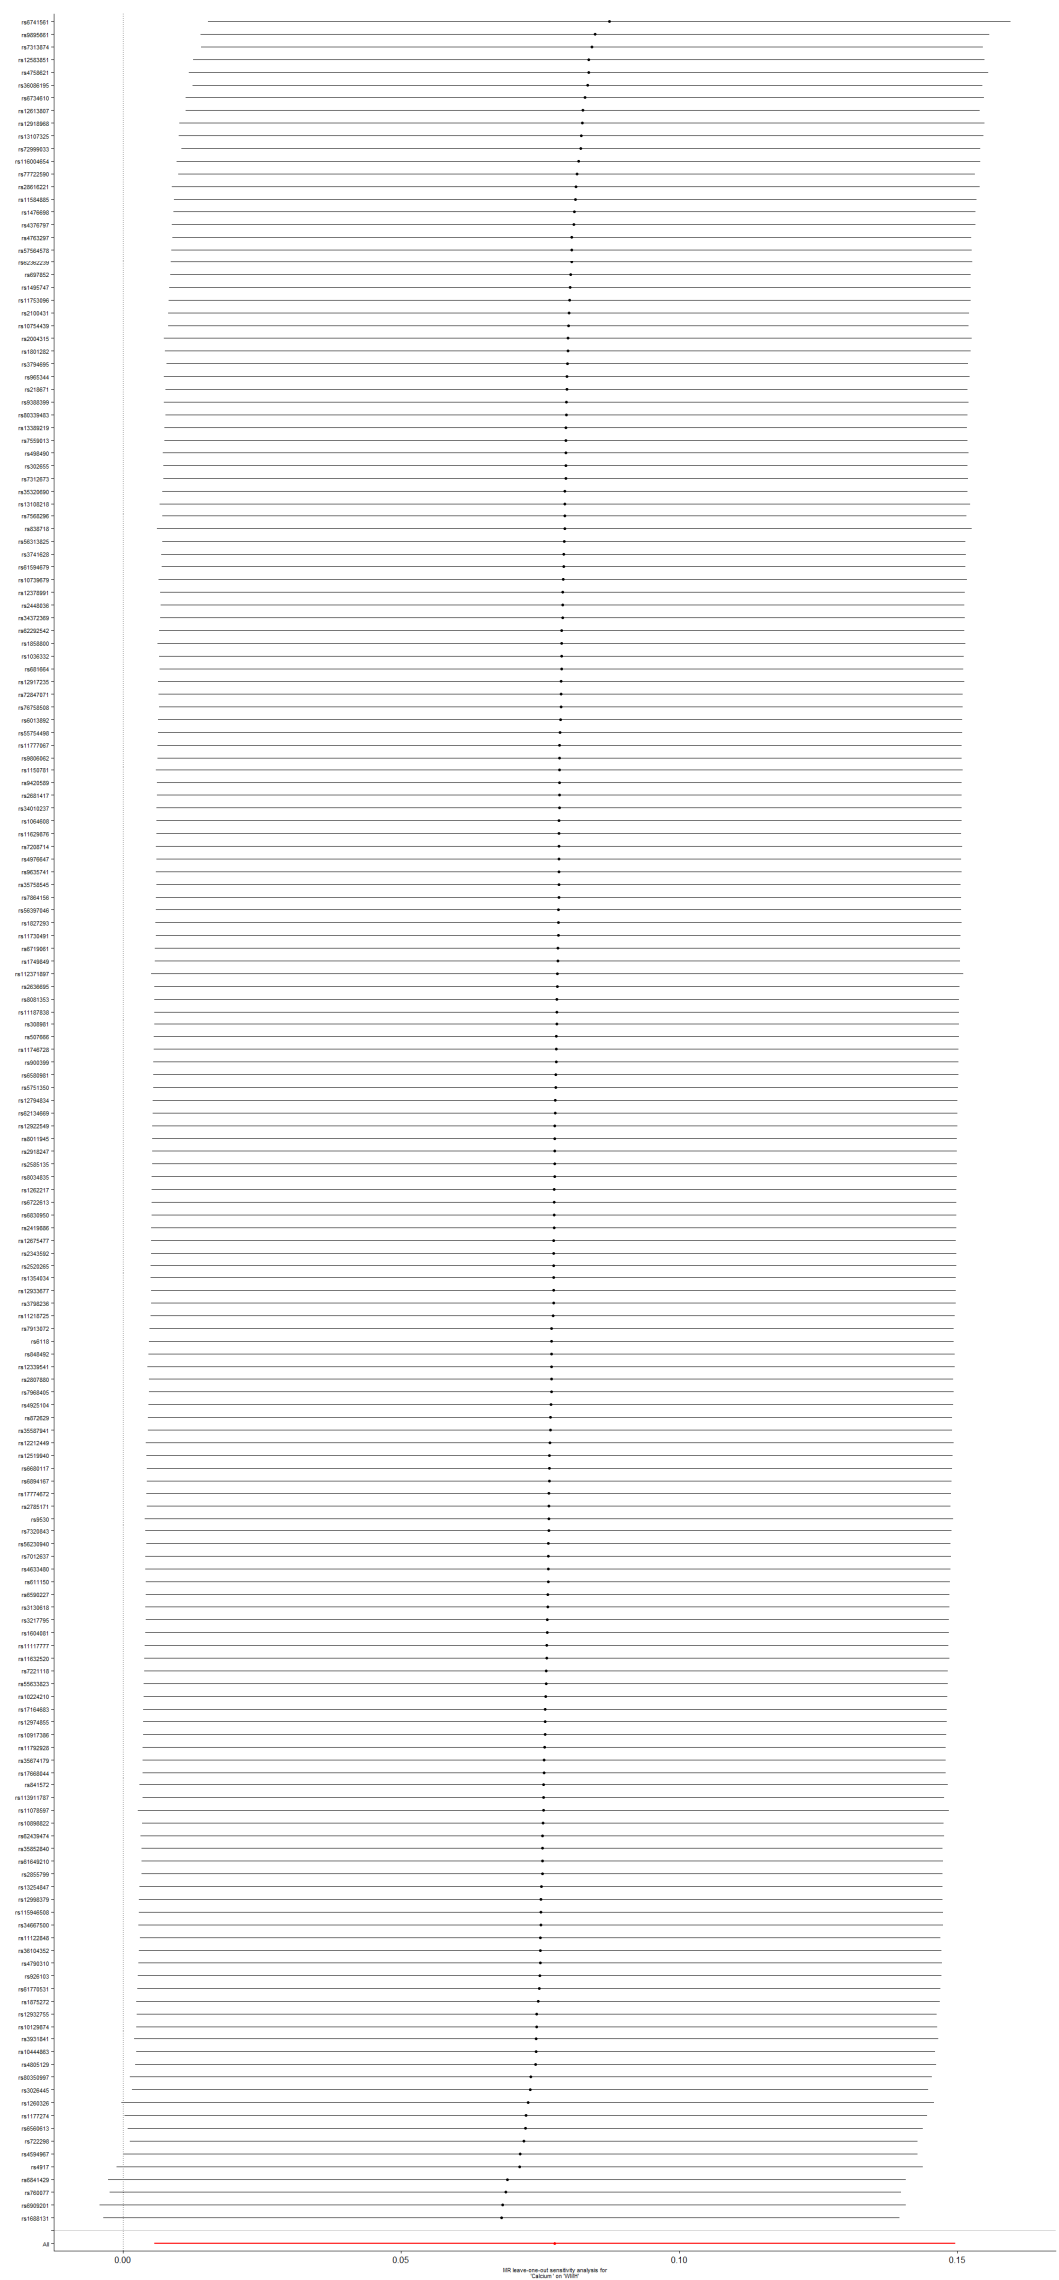

Figure S2.13 Leave-one-out plot of calcium and WMH

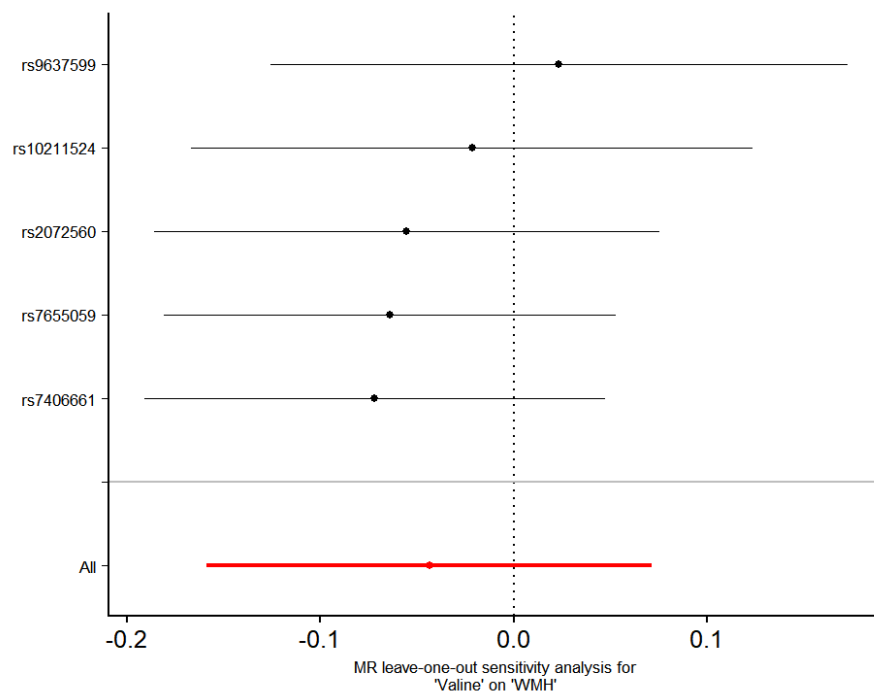

**Figure S2.14** Leave-one-out plot of valine and WMH

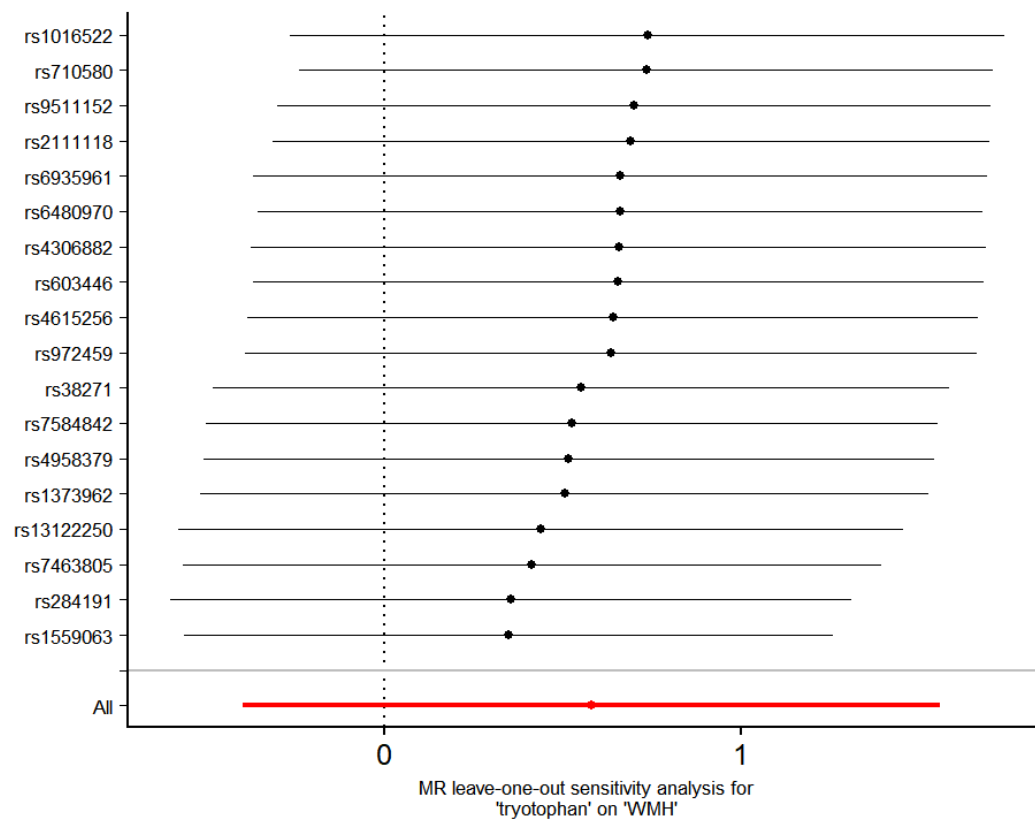

**Figure S2.15** Leave-one-out plot of tryptophan and WMH

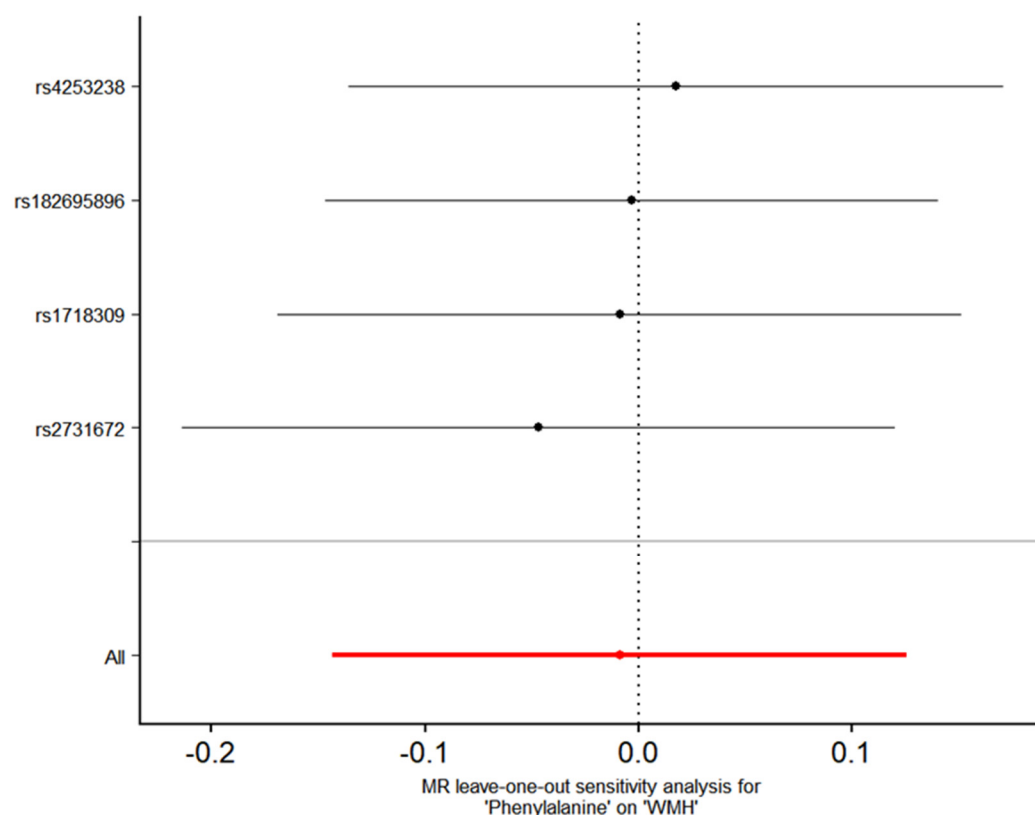

**Figure S2.16** Leave-one-out plot of phenylalanine and WMH

**Figure S2.** Leave-one-out plots of essential nutrients exposures and WMH. The x-axis represents the beta value for the outcome obtained by removing the left SNP from the IVW analysis (i.e., the dots on each solid line). The y-axis represents the SNP removed for each analysis. Each solid line represents the 95% CI for the beta value. The bottom red line is the overall result obtained by all the SNPs of exposure.

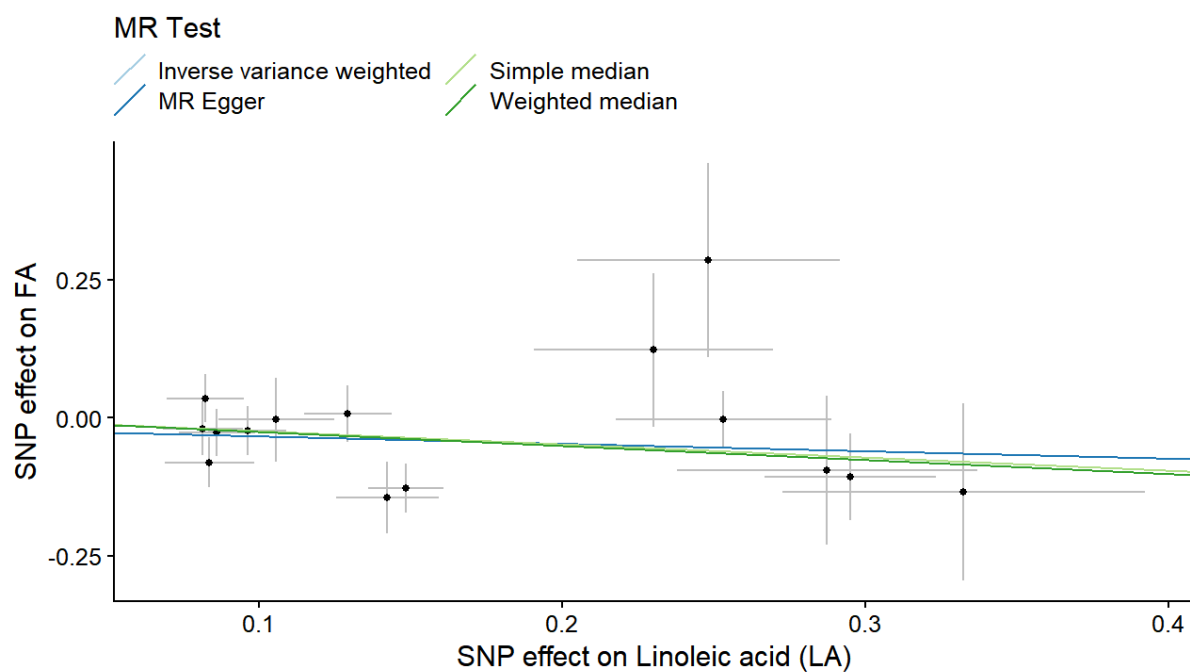

**Figure S3.1** Scatterplot of linolenic acid(LA) and FA

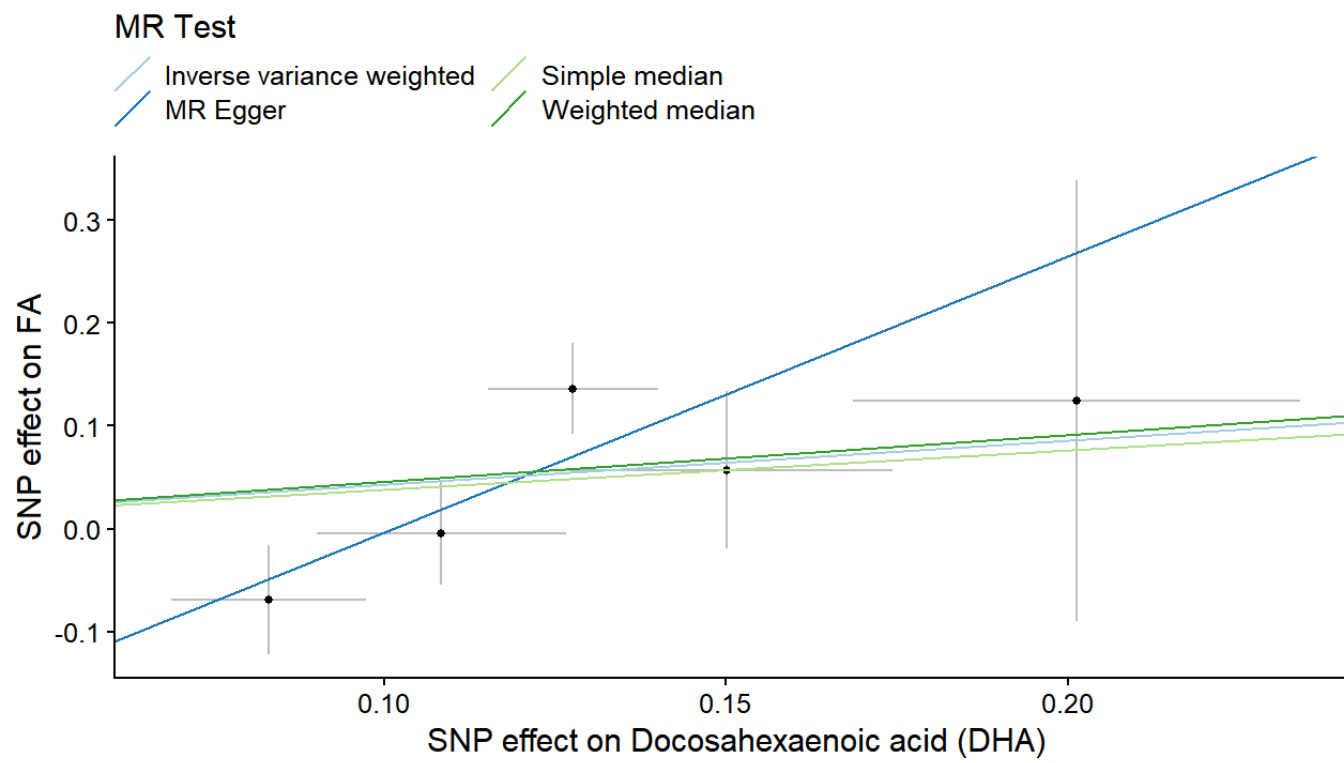

Figure S3.2 Scatterplot of docosahexaenoic acid (DHA) and FA

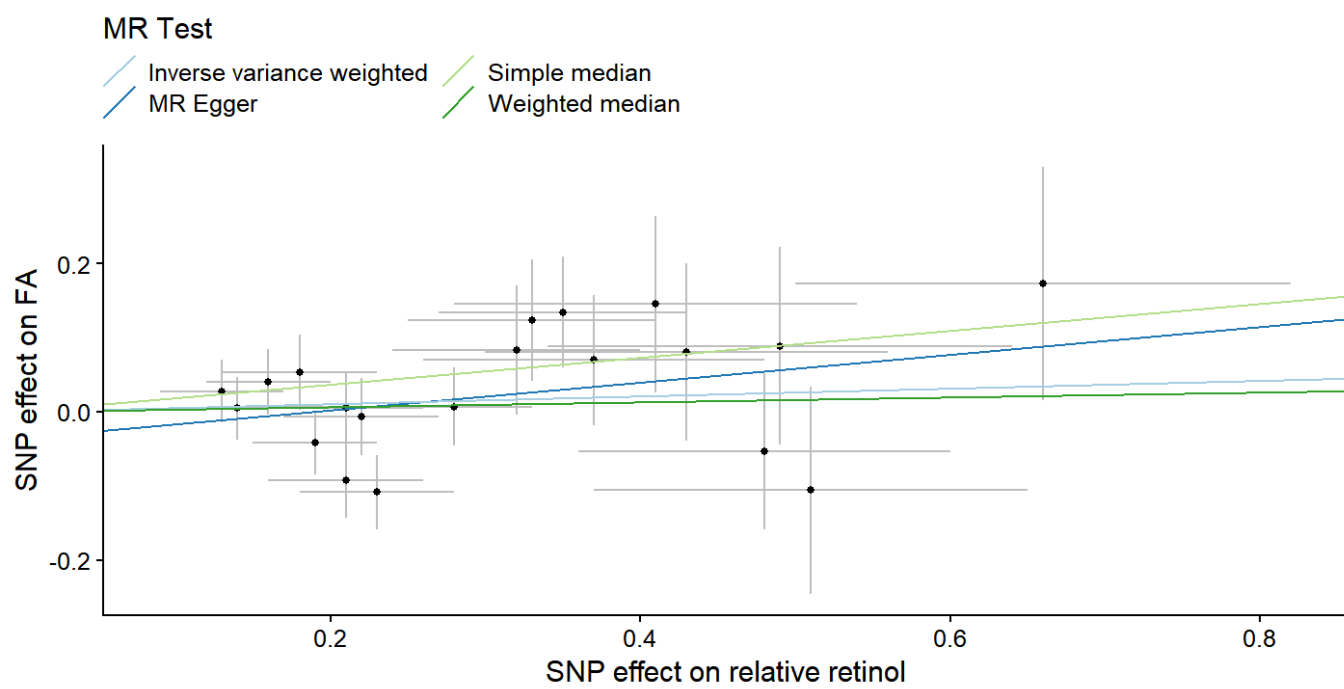

Figure S3.3 Scatterplot of relative retinol and FA

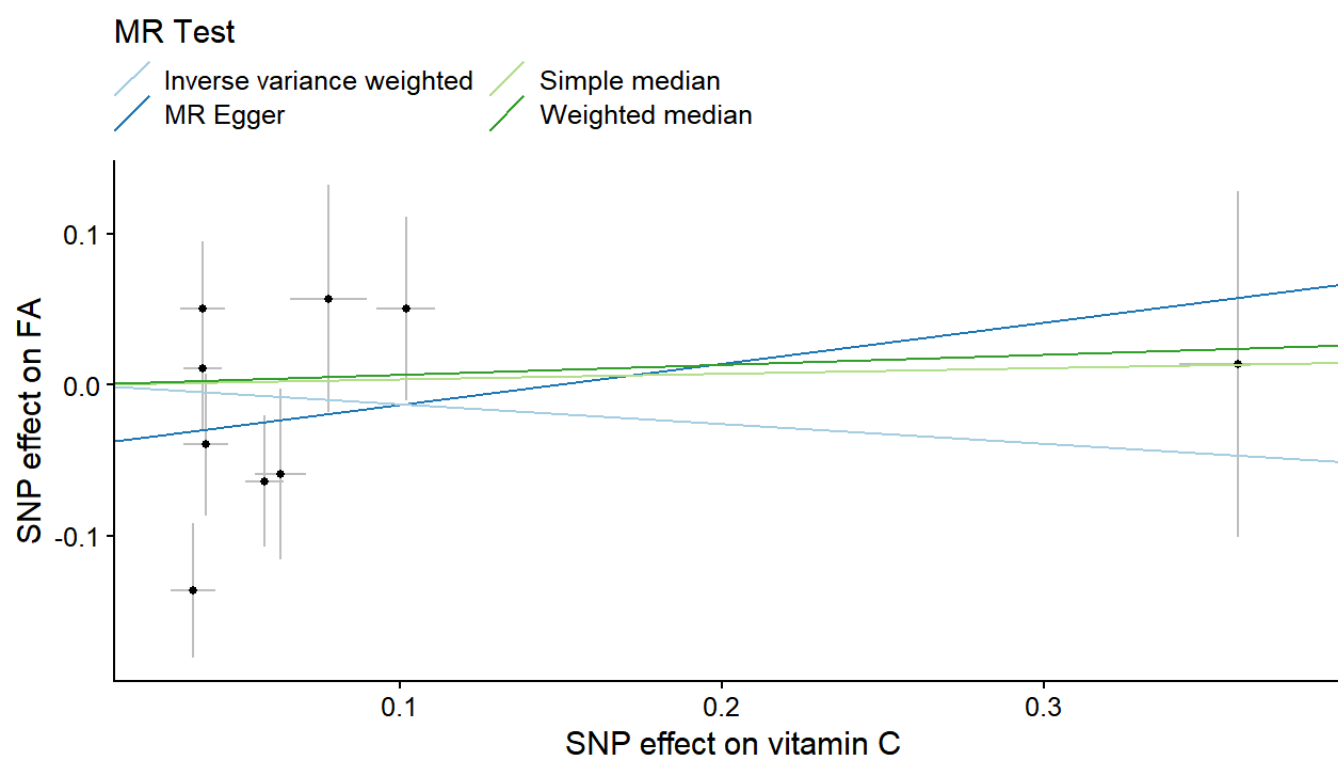

Figure S3.4 Scatterplot of vitamin C and FA

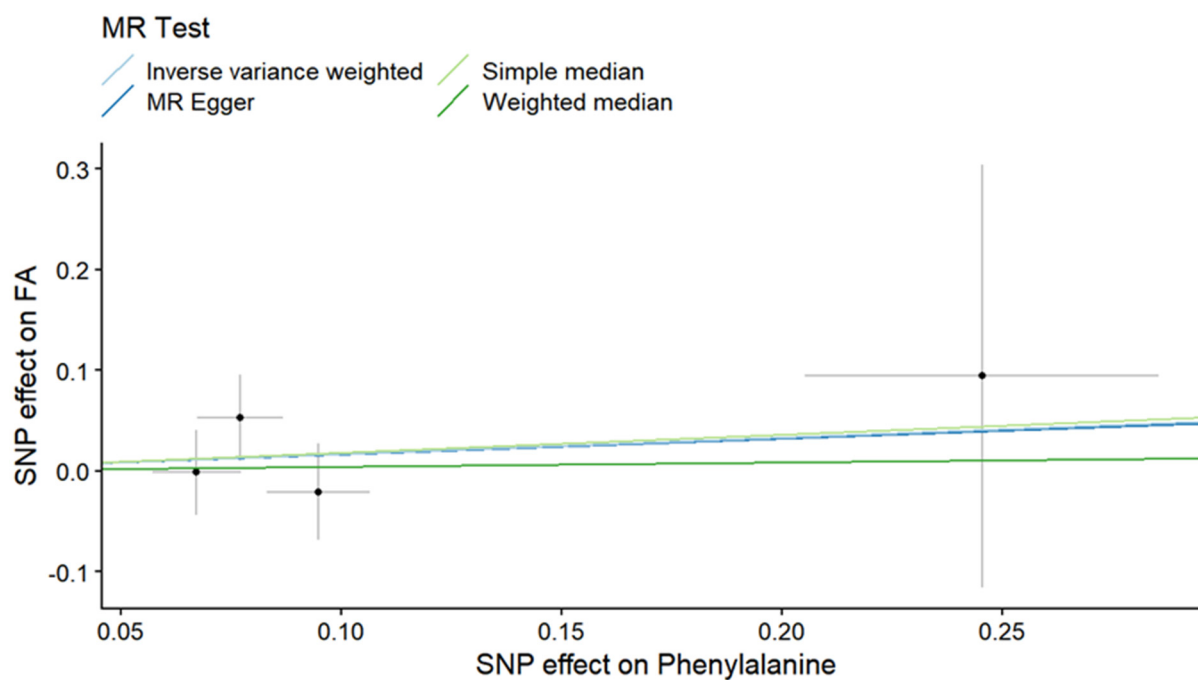

Figure S3.5 Scatterplot of absolute phenylalanine and FA



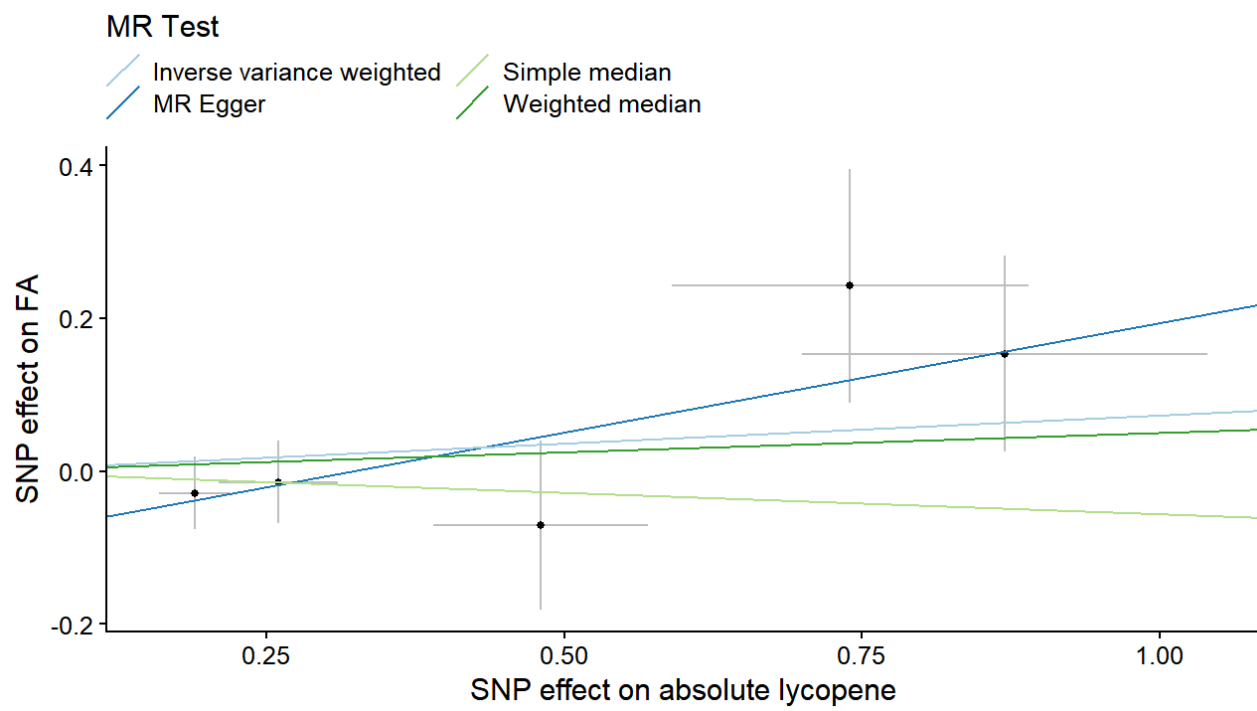

Figure S3.6 Scatterplot of absolute lycopene and FA

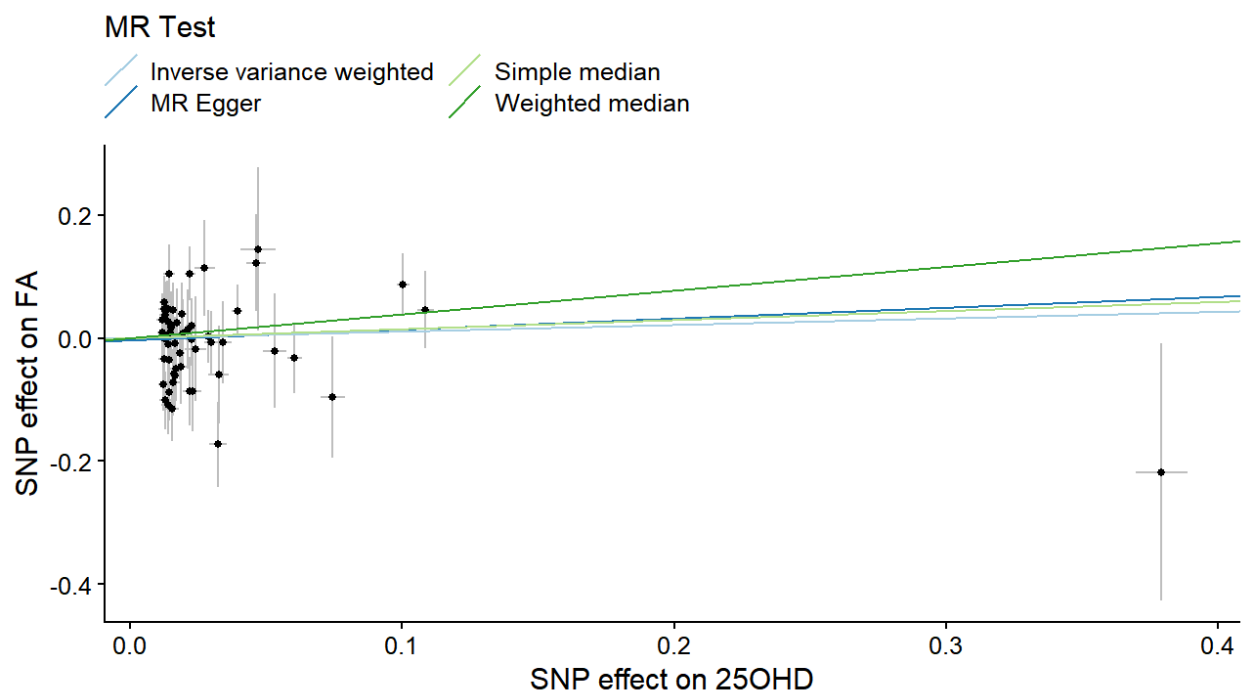

Figure S3.7 Scatterplot of 25OHD and FA

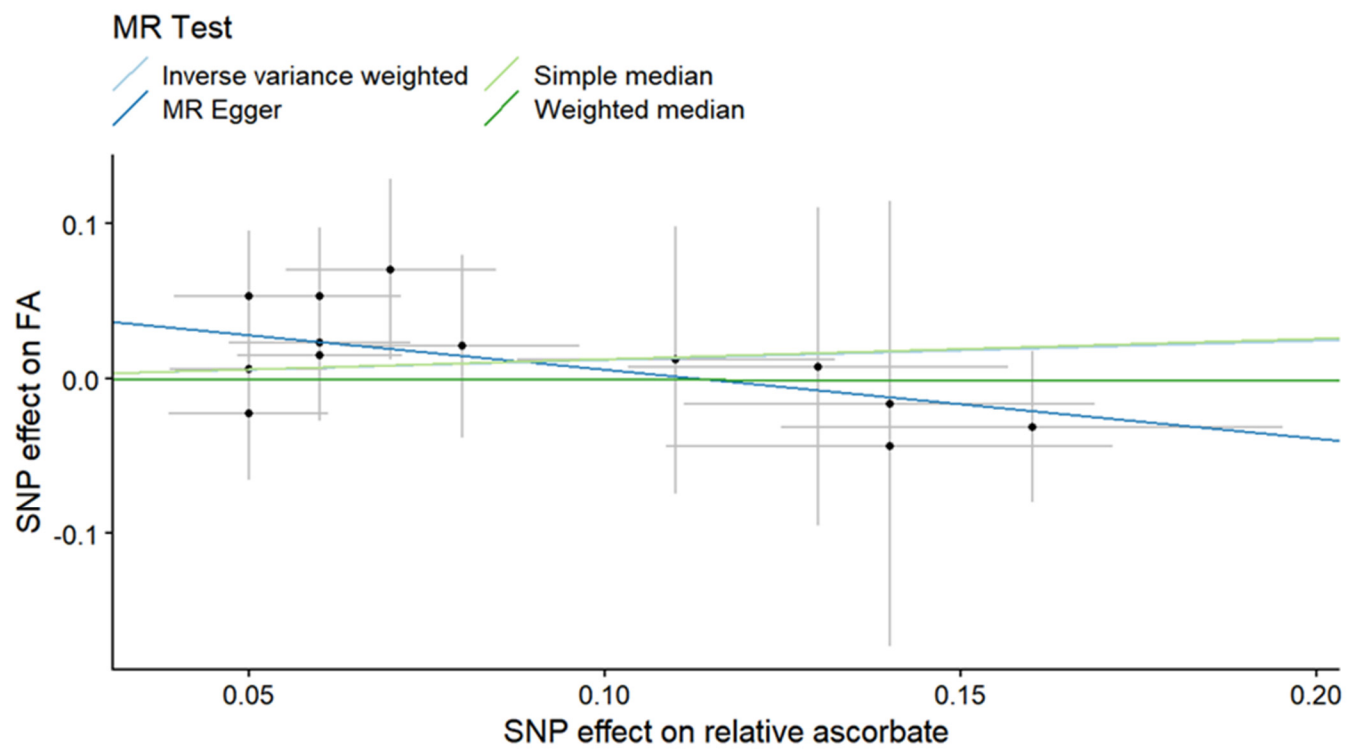

Figure S3.8 Scatterplot of relative ascorbate and FA

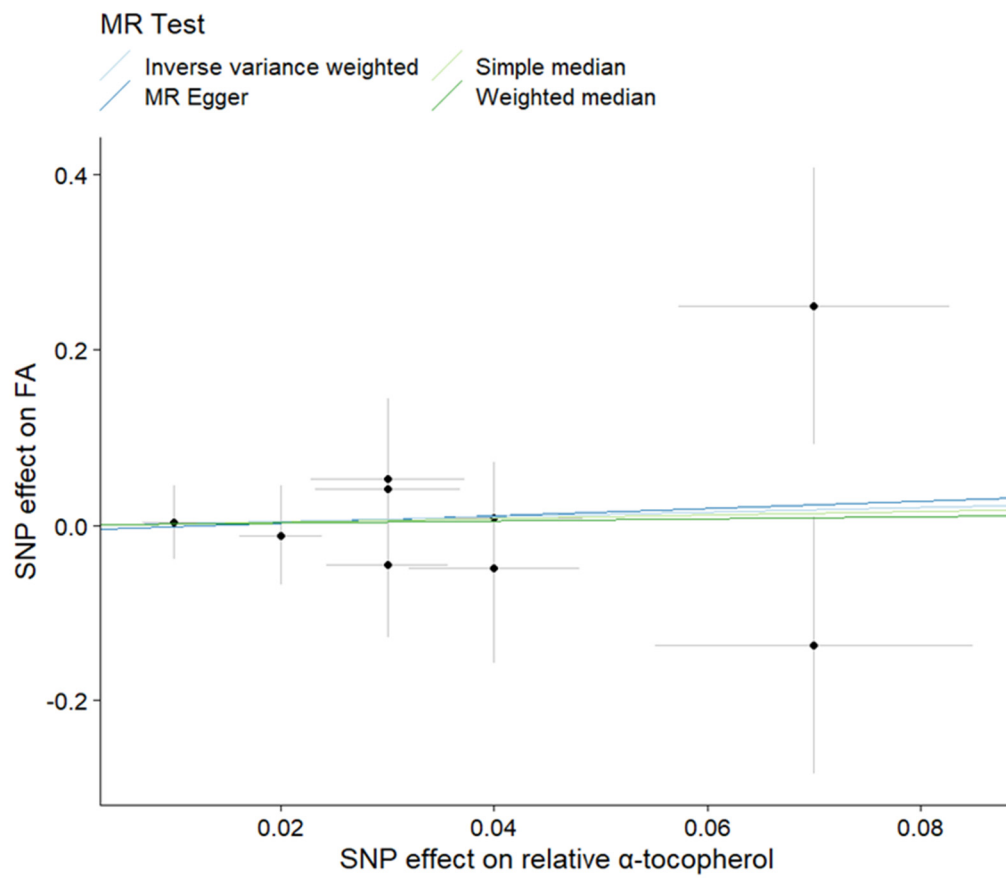

Figure S3.9 Scatterplot of relative  $\alpha$  -tocopherol and FA

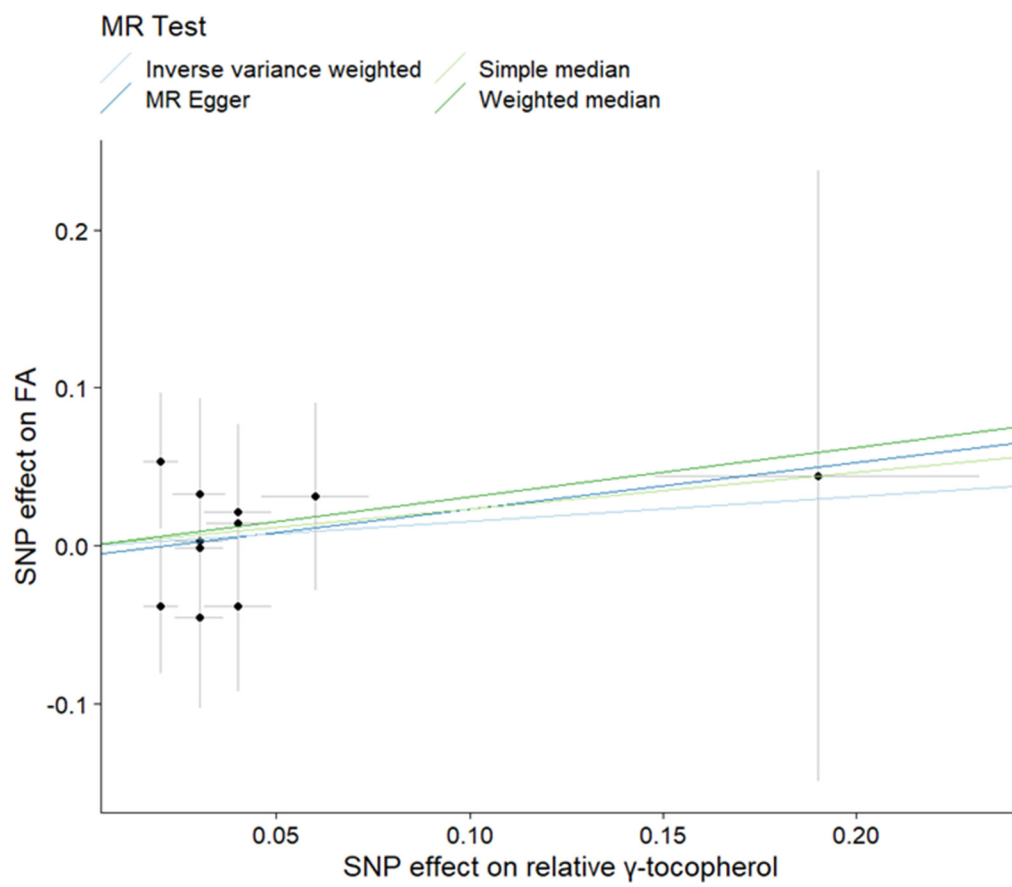

Figure S3.10 Scatterplot of relative  $\gamma$ -tocopherol and FA

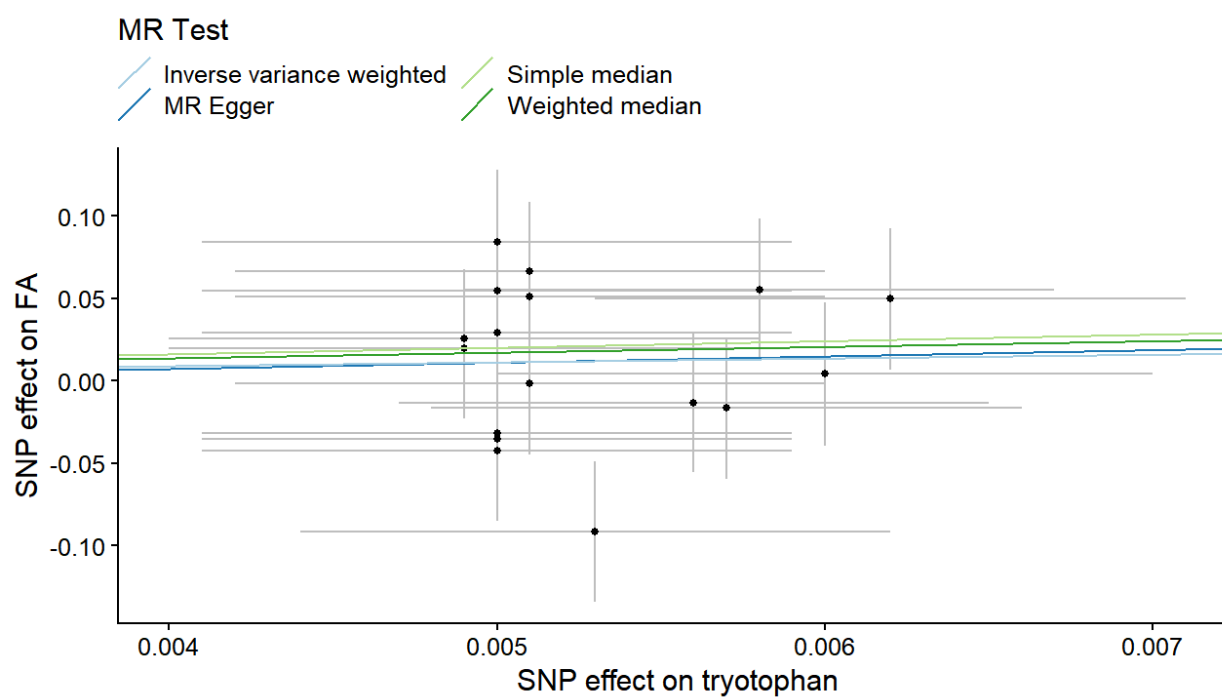

Figure S3.11 Scatterplot of tryptophan and FA

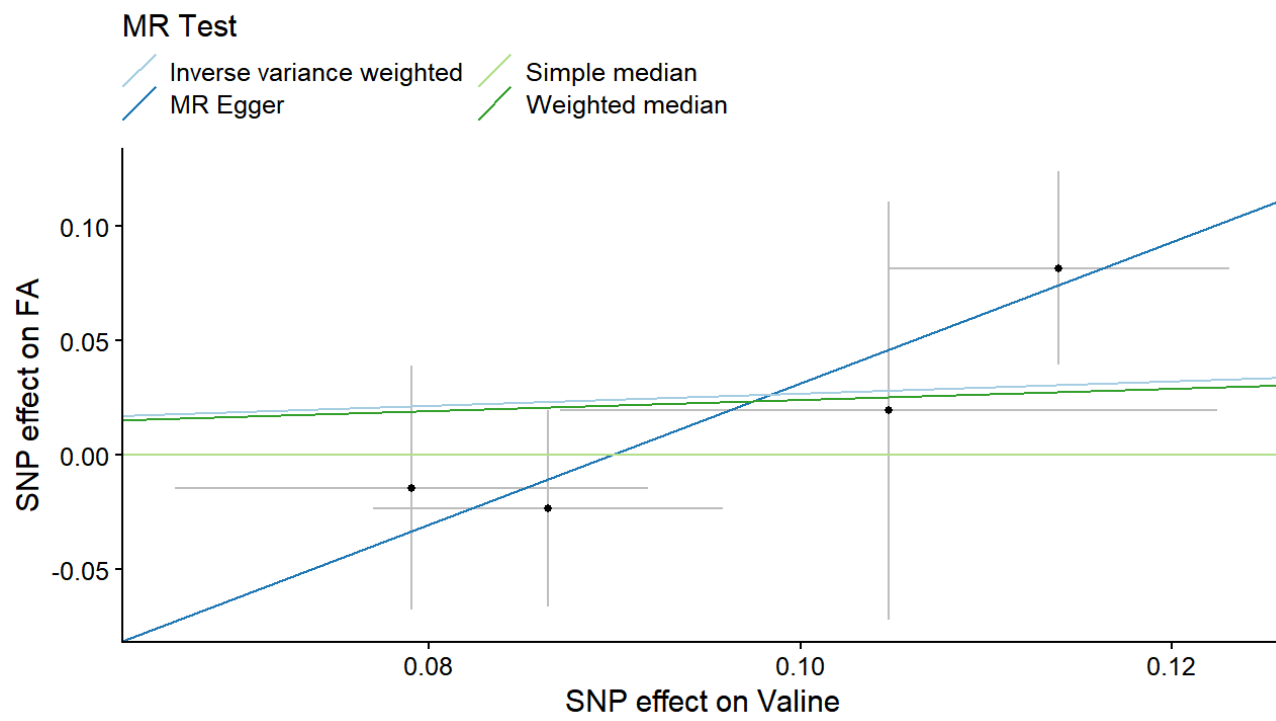

Figure S3.12 Scatterplot of valine and FA

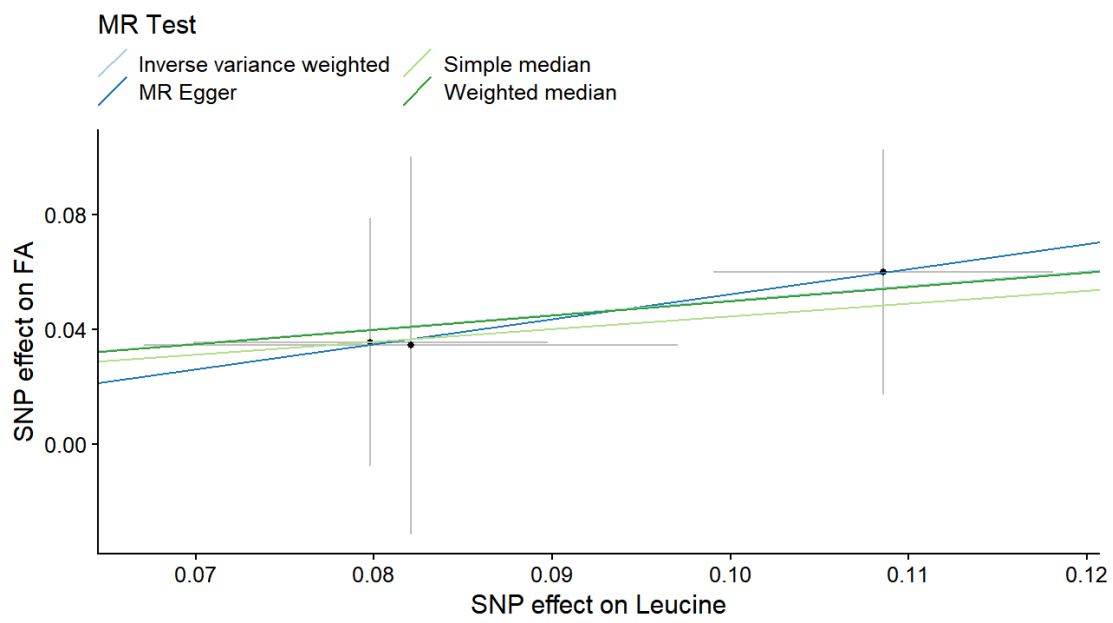

Figure S3.13 Scatterplot of leucine and FA

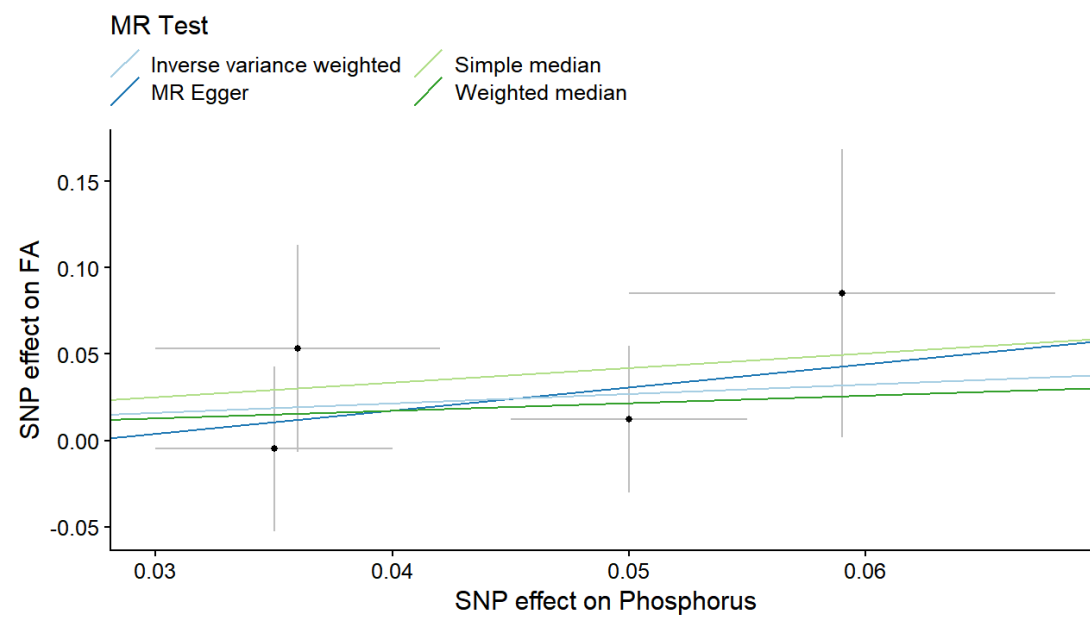

Figure S3.14 Scatterplot of phosphorus and FA

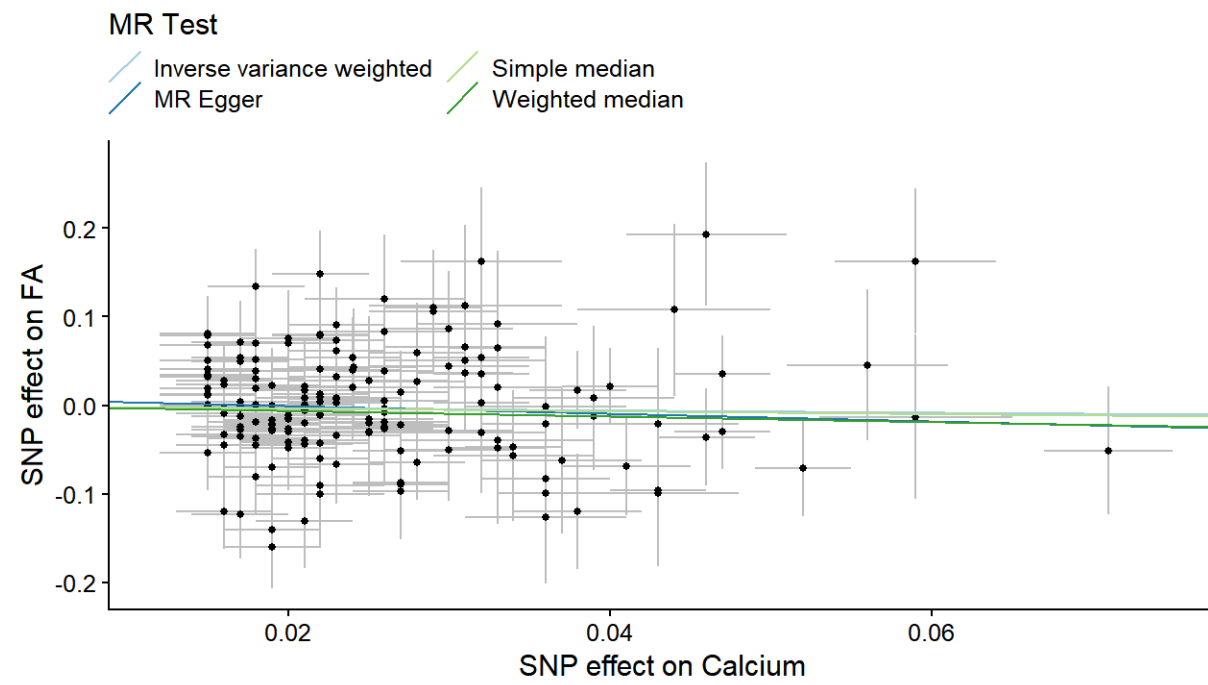

Figure S3.15 Scatterplot of calcium and FA

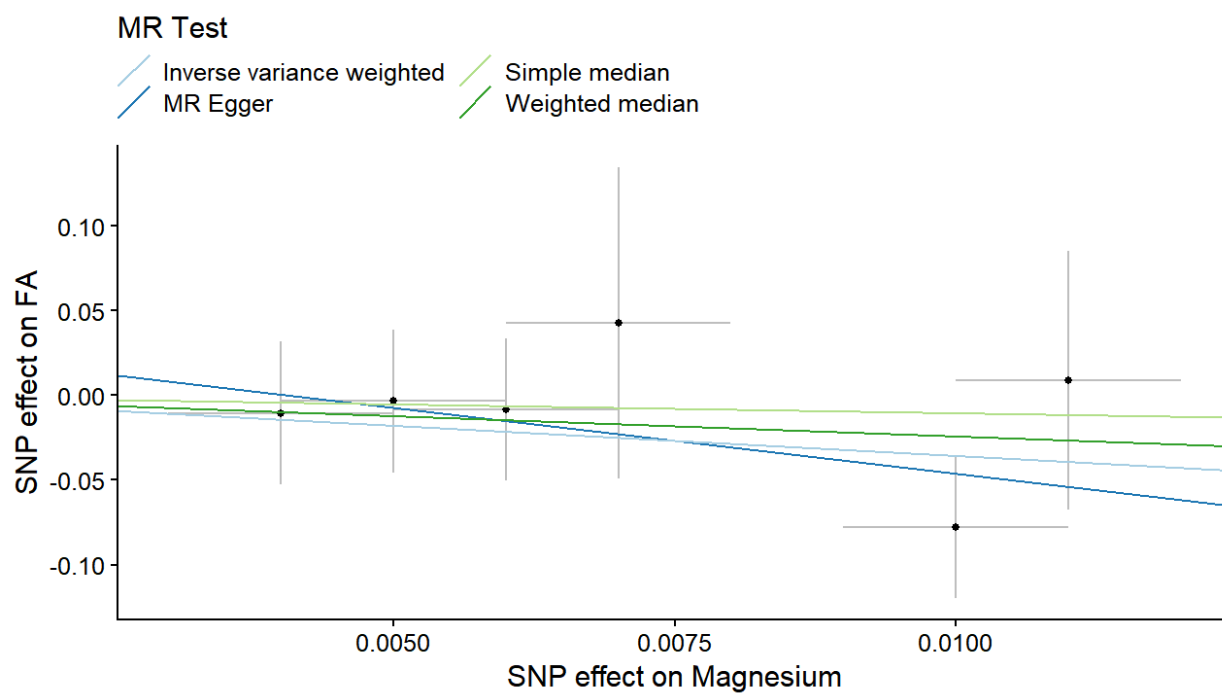

**Figure S3.16 Scatterplot of magnesium and FA**

**Figure S3.** Scatterplots of essential nutrients exposures and FA. The x-axis represents the previously published  $\beta$ -estimate for the association between each SNP and essential nutrients. The y-axis represents the  $\beta$ -estimate for the association between each SNP and risk of cerebral hemorrhage. The slope of each line corresponds to the estimated MR effect per method.

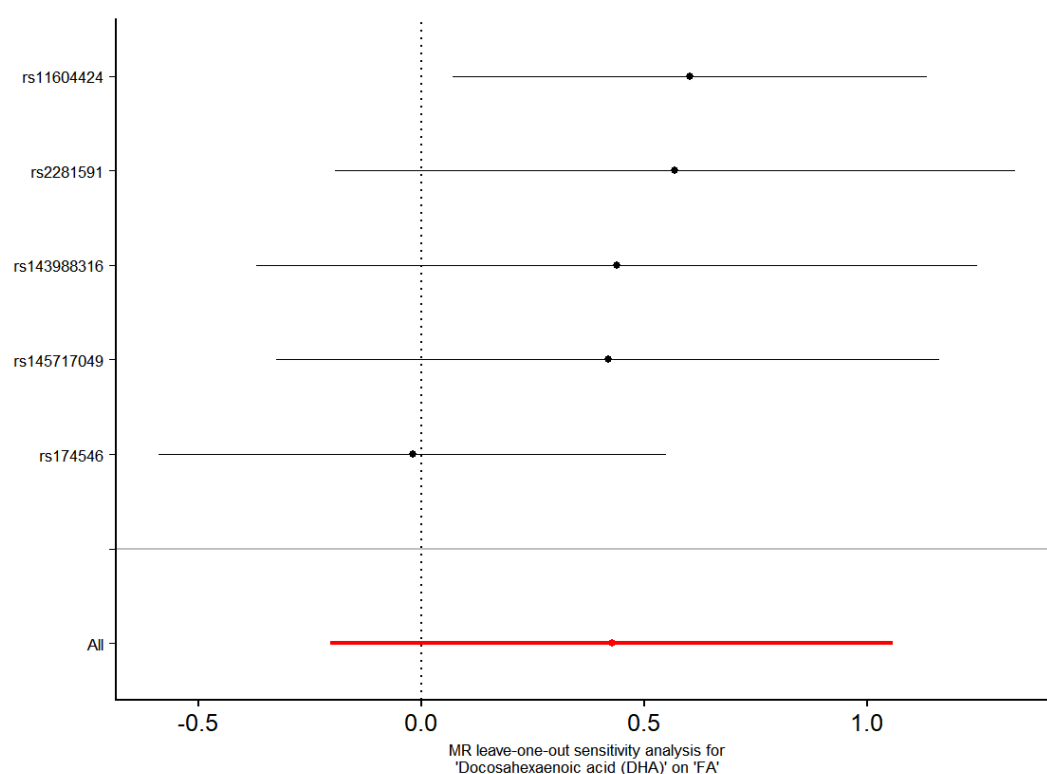

**Figure S4.1 Leave-one-out plot of docosahexaenoic acid (DHA) and FA**

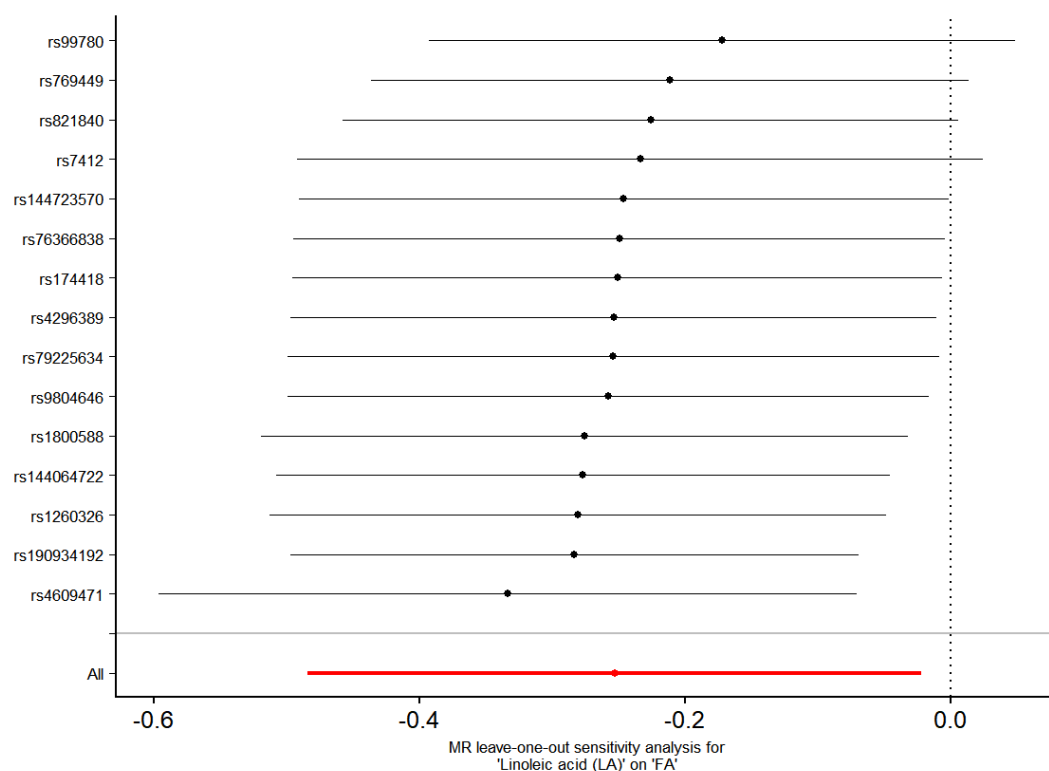

**Figure S4.2 Leave-one-out plot of linolenic acid(LA) and FA**

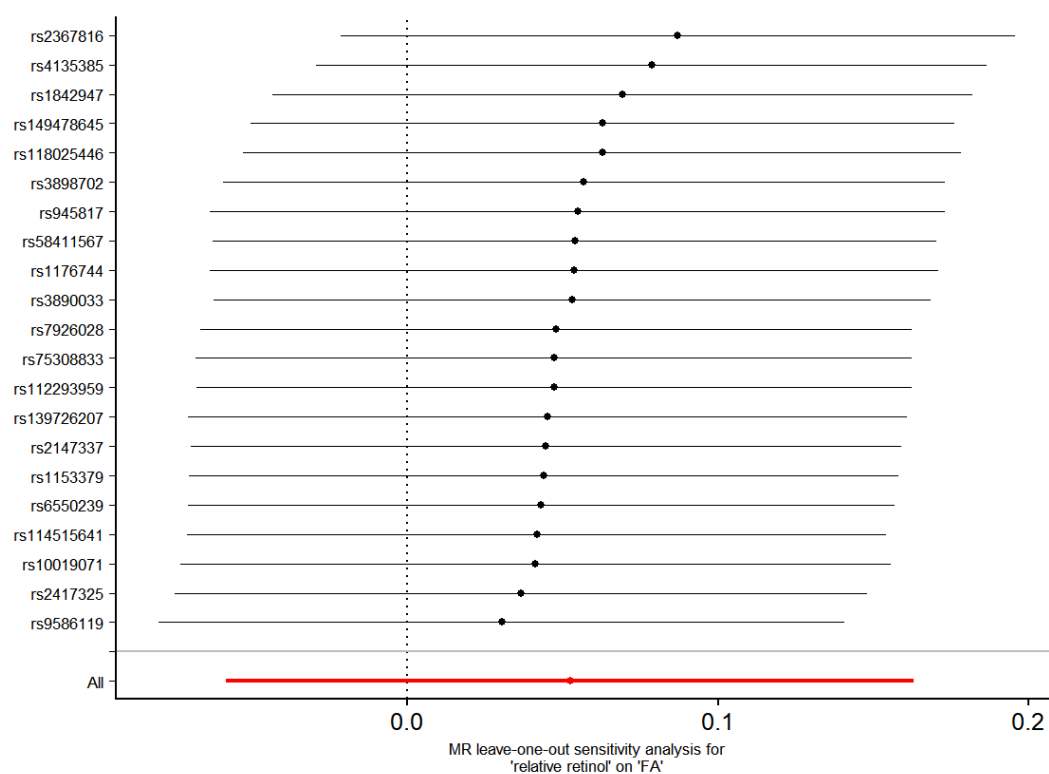

**Figure S4.3 Leave-one-out plot of relative retinol and FA**

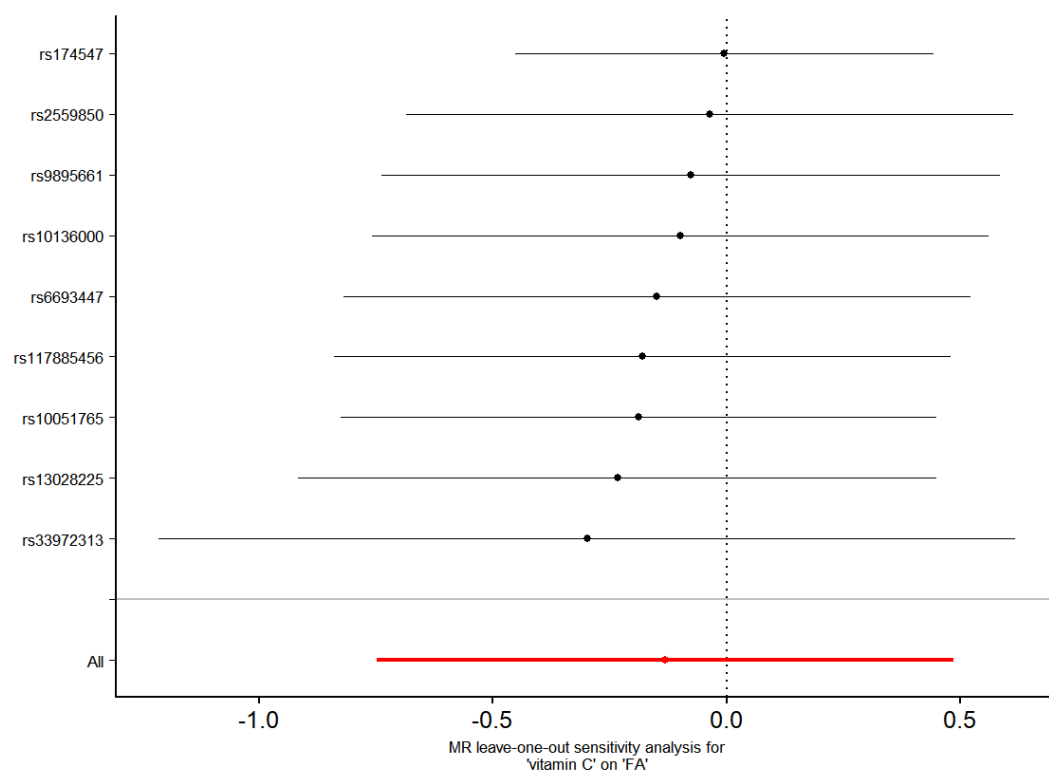

**Figure S4.4** Leave-one-out plot of vitamin C and FA

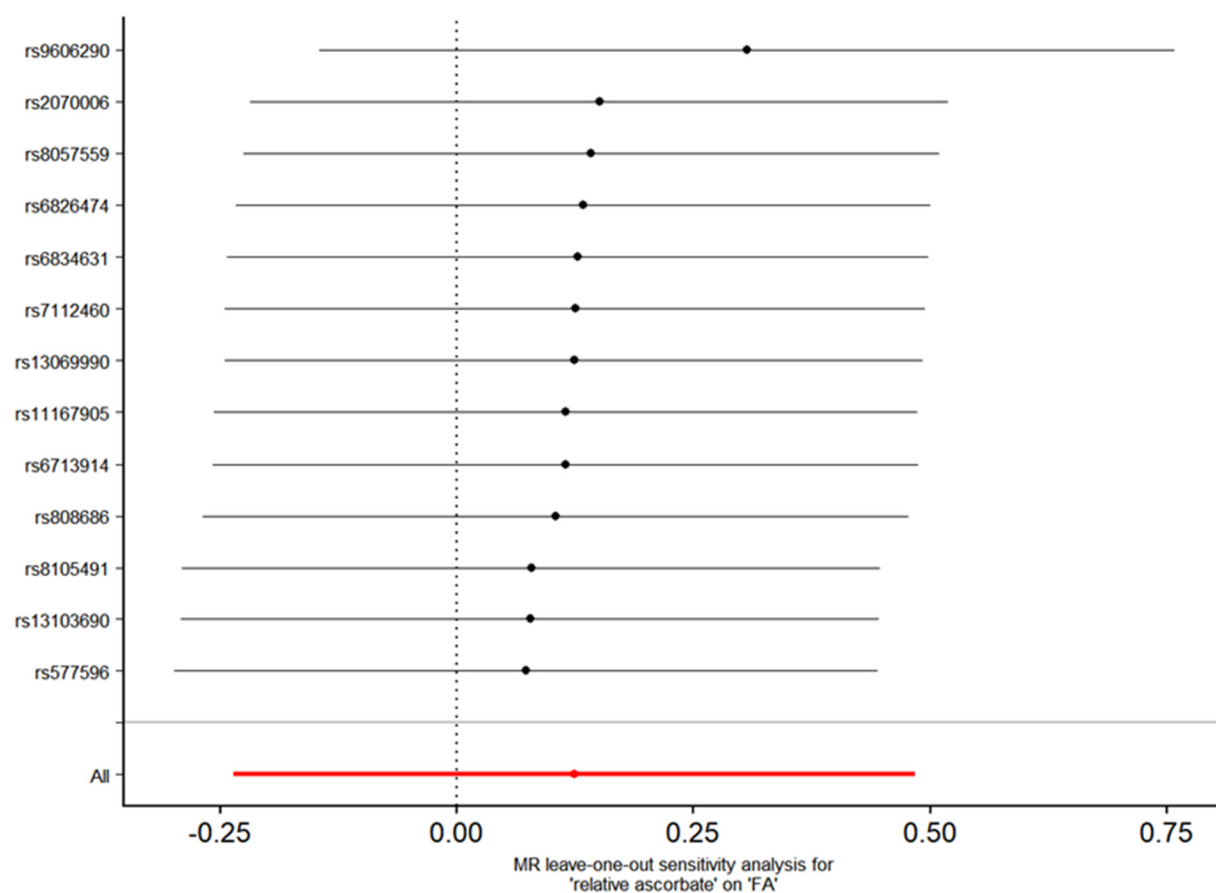

**Figure S4.5** Leave-one-out plot of relative ascorbate and FA



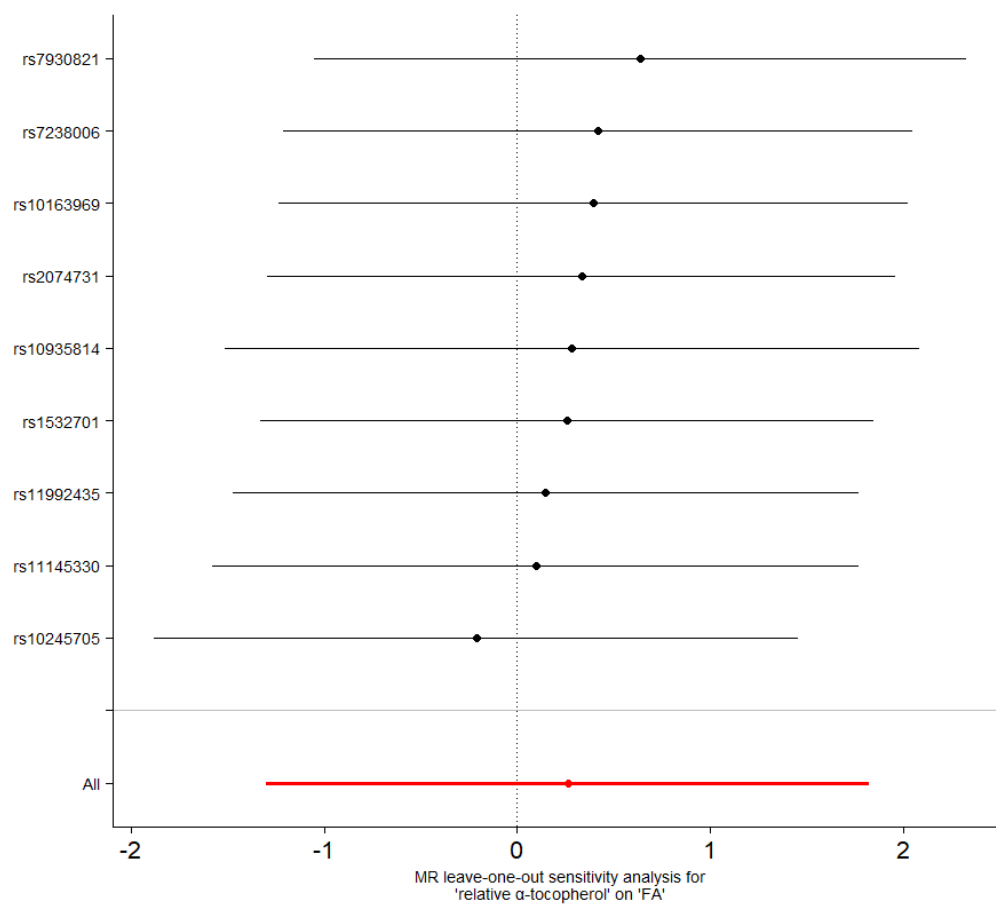

**Figure S4.6** Leave-one-out plot of relative  $\alpha$  -tocopherol and FA

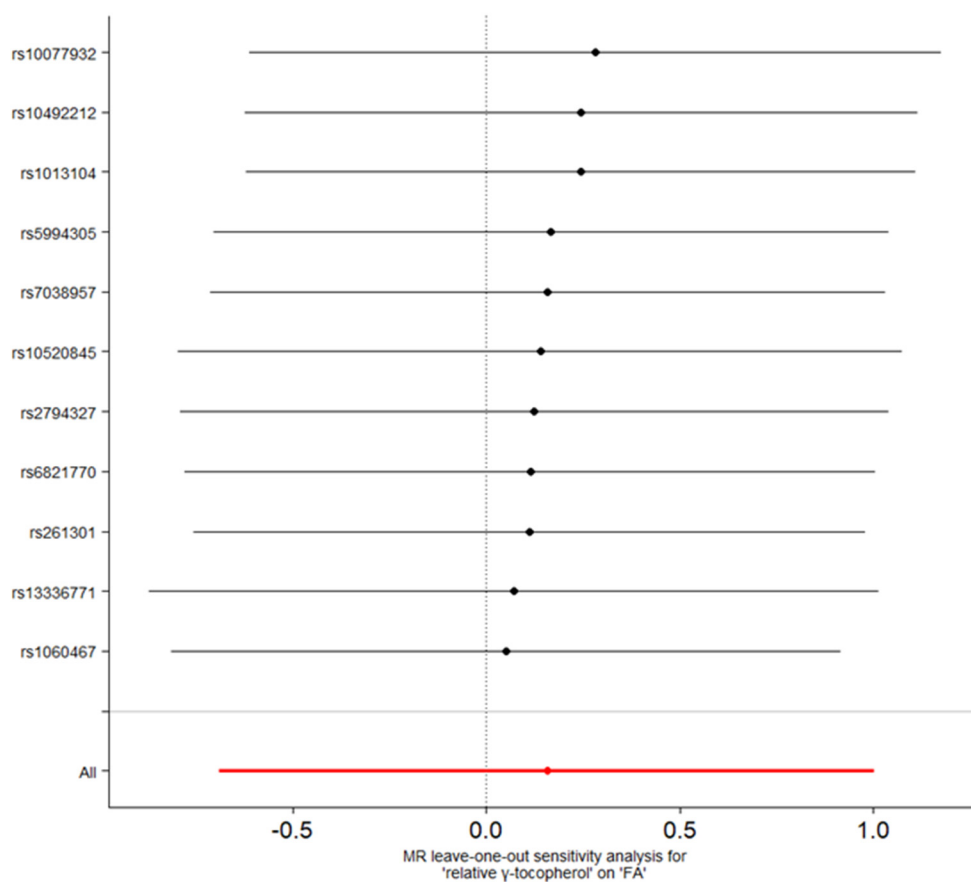

**Figure S4.7** Leave-one-out plot of relative  $\gamma$  -tocopherol and FA

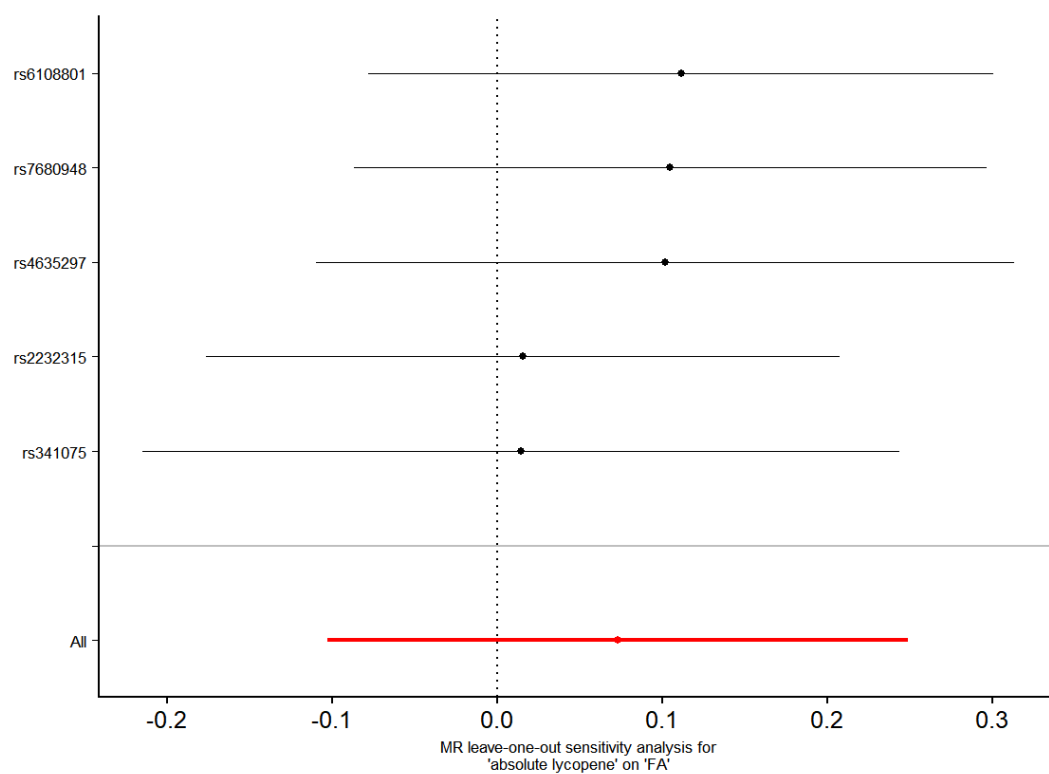

**Figure S4.8** Leave-one-out plot of absolute lycopene and FA

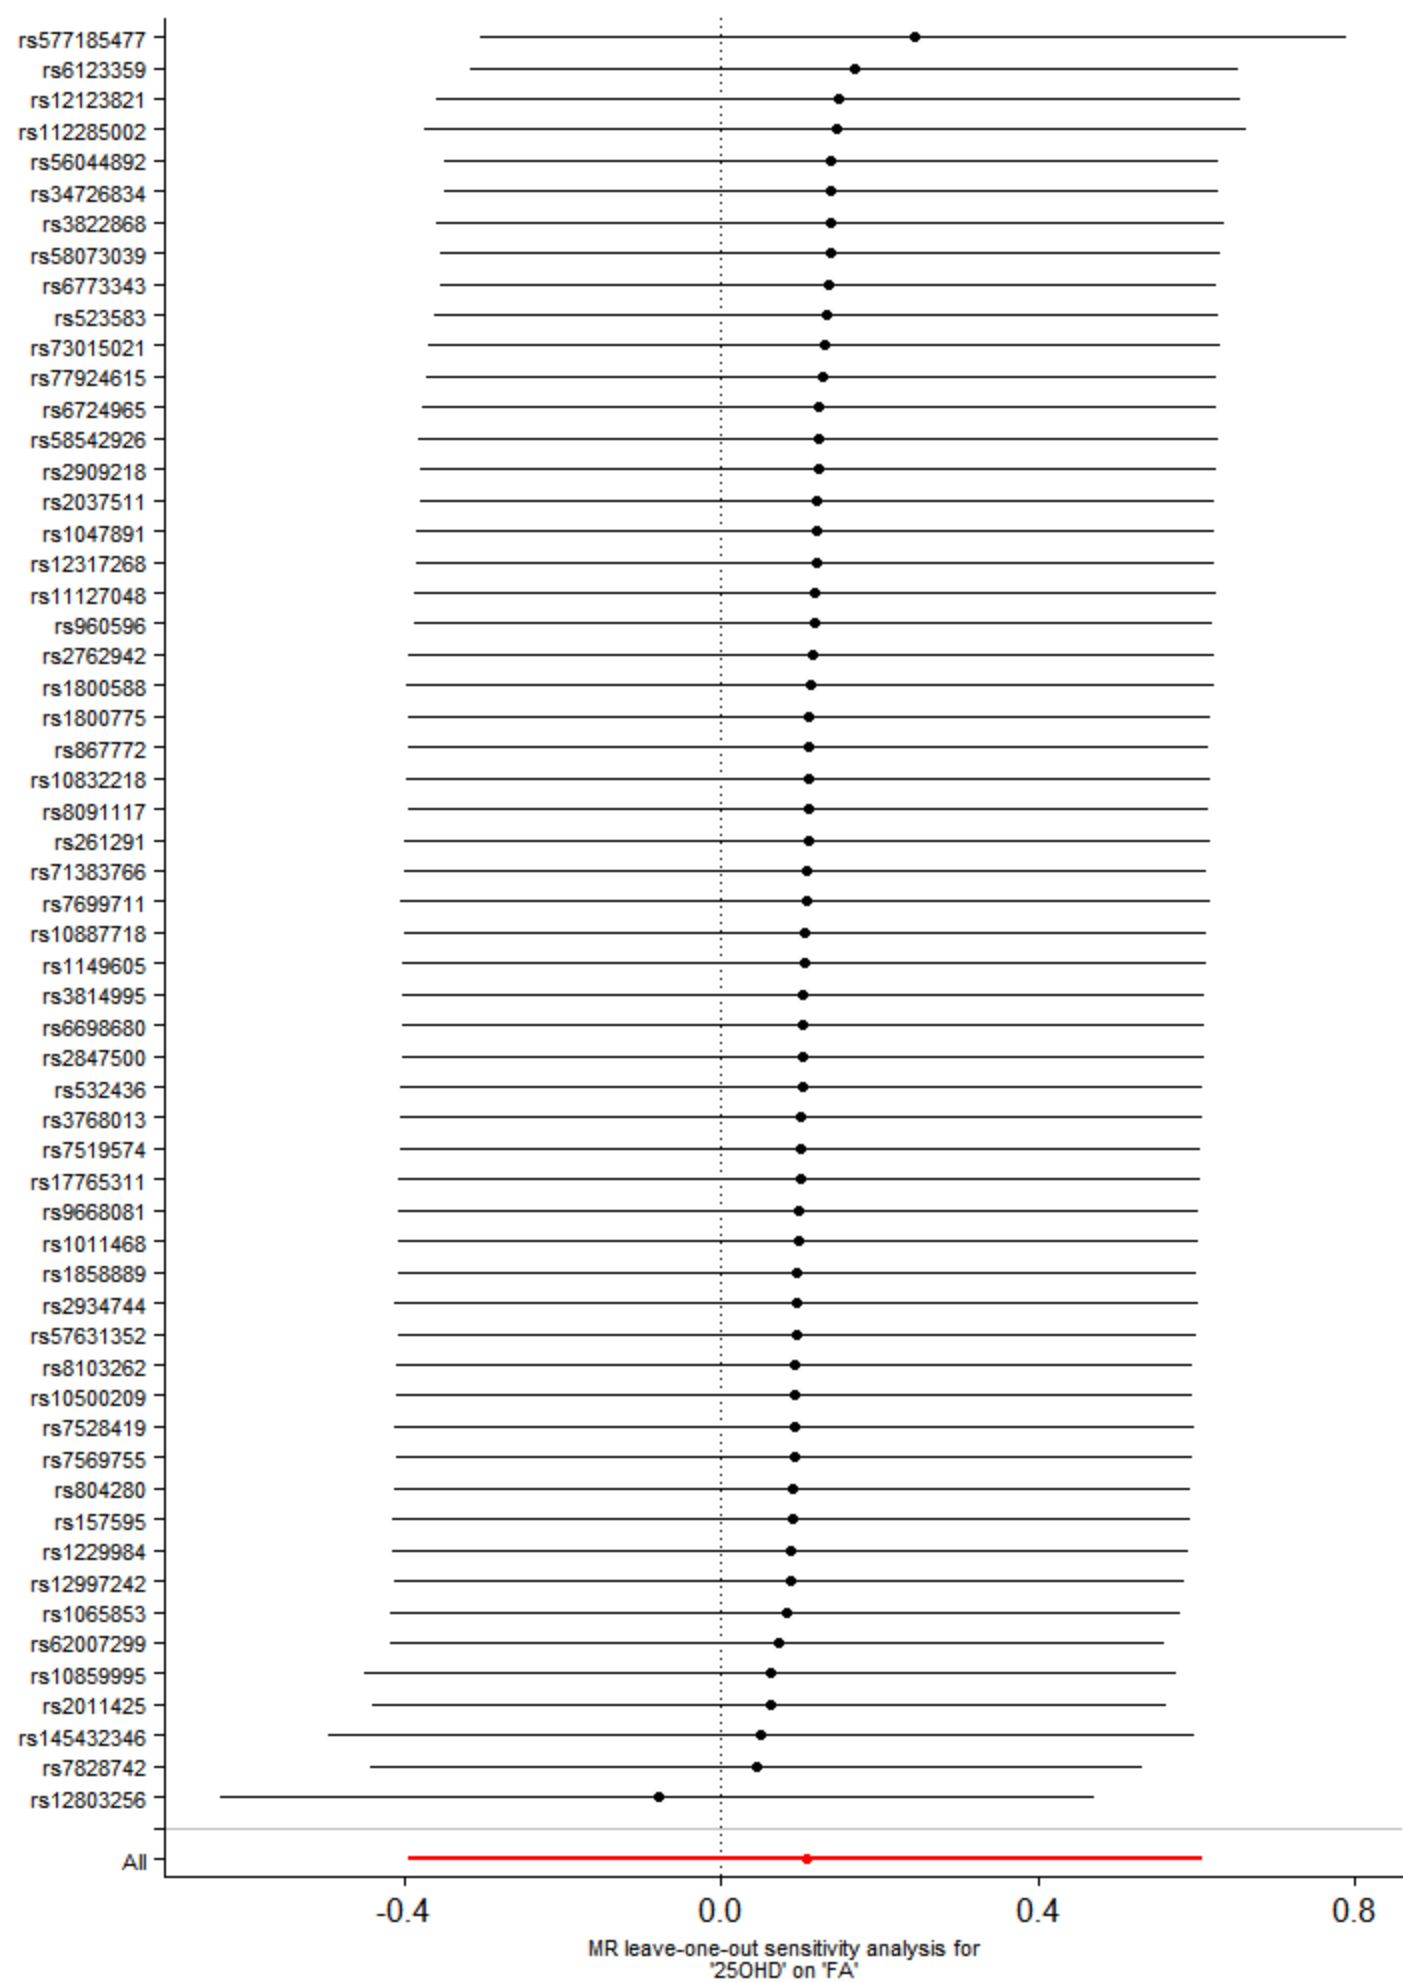

Figure S4.9 Leave-one-out plot of 25OHD and FA

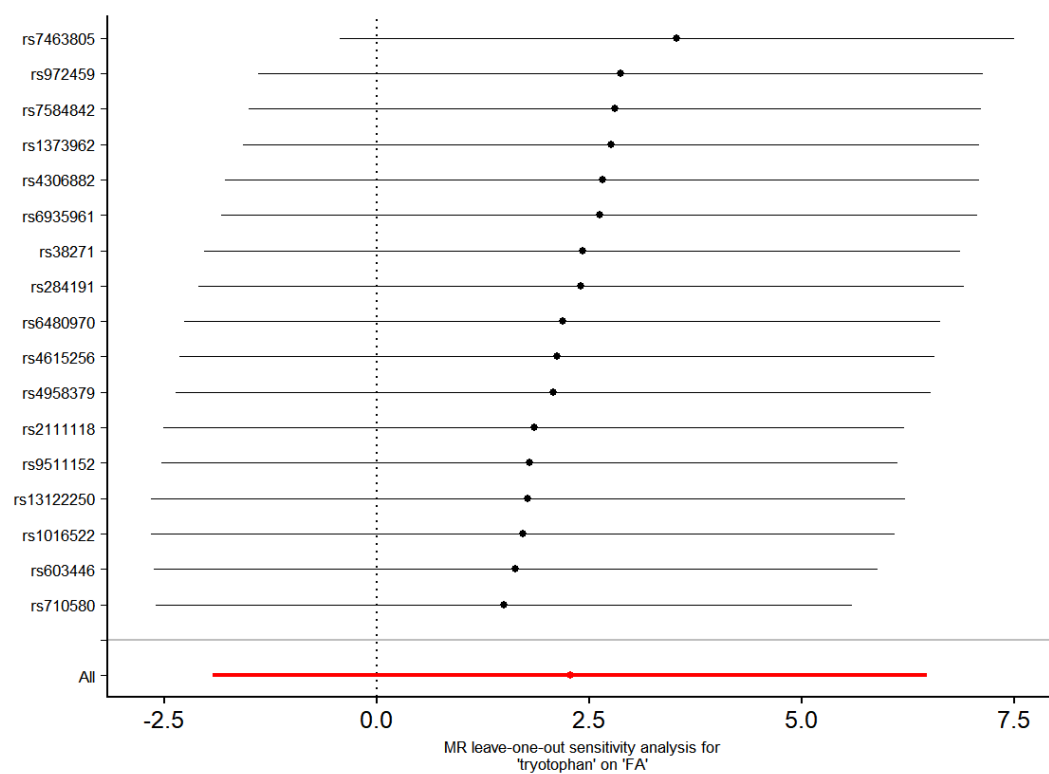

**Figure S4.10** Leave-one-out plot of tryptophan and FA

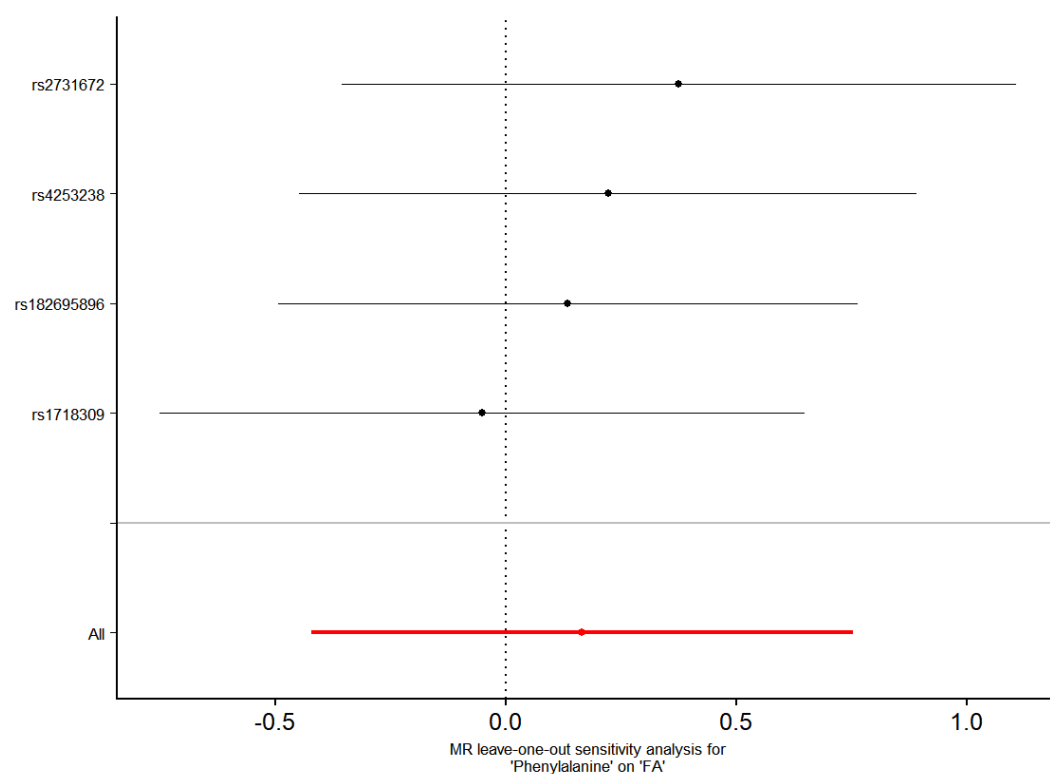

**Figure S4.11** Leave-one-out plot of phenylalanine and FA

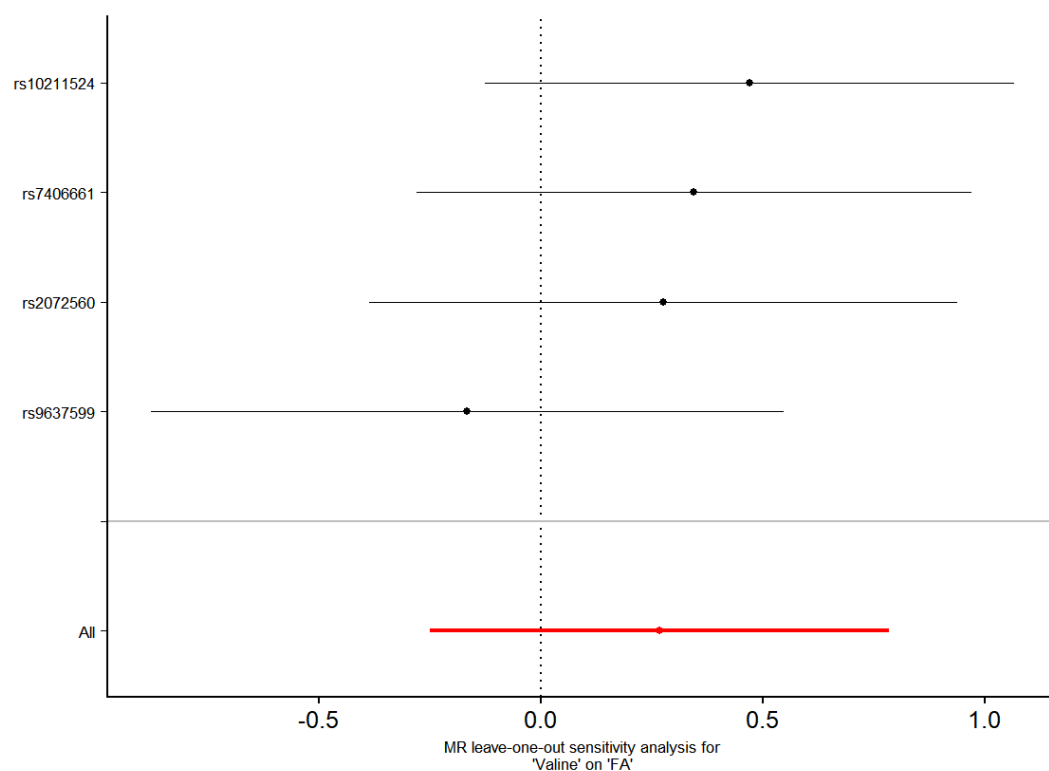

**Figure S4.12** Leave-one-out plot of valine and FA

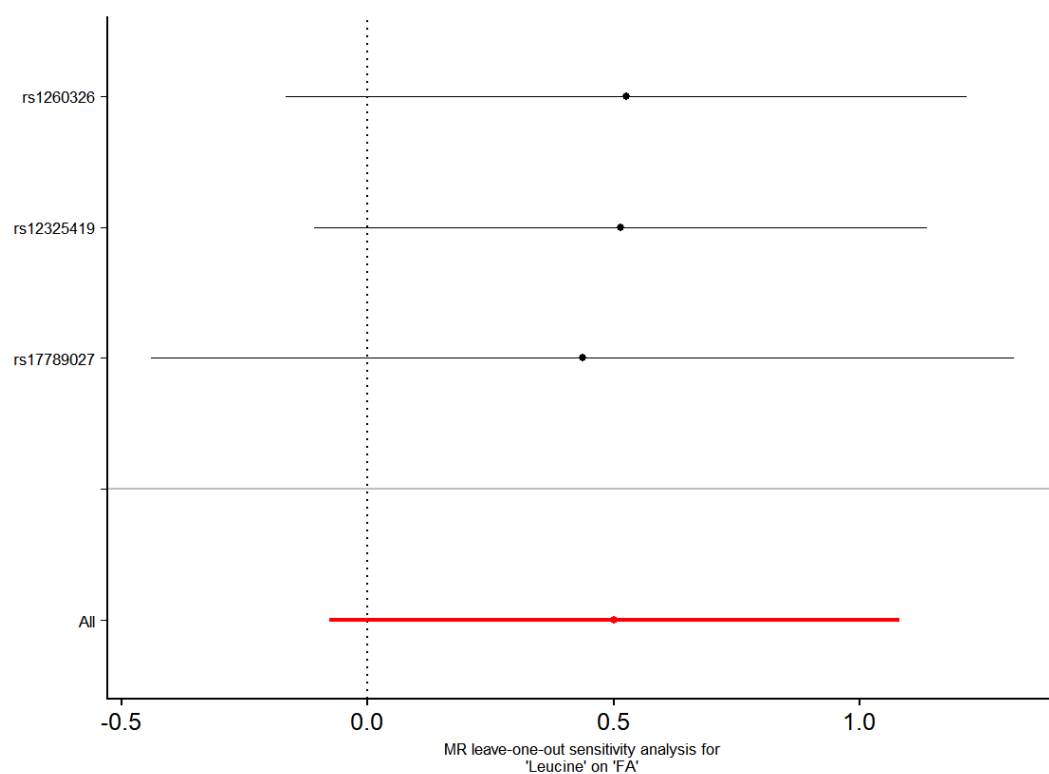

**Figure S4.13** Leave-one-out plot of leucine and FA

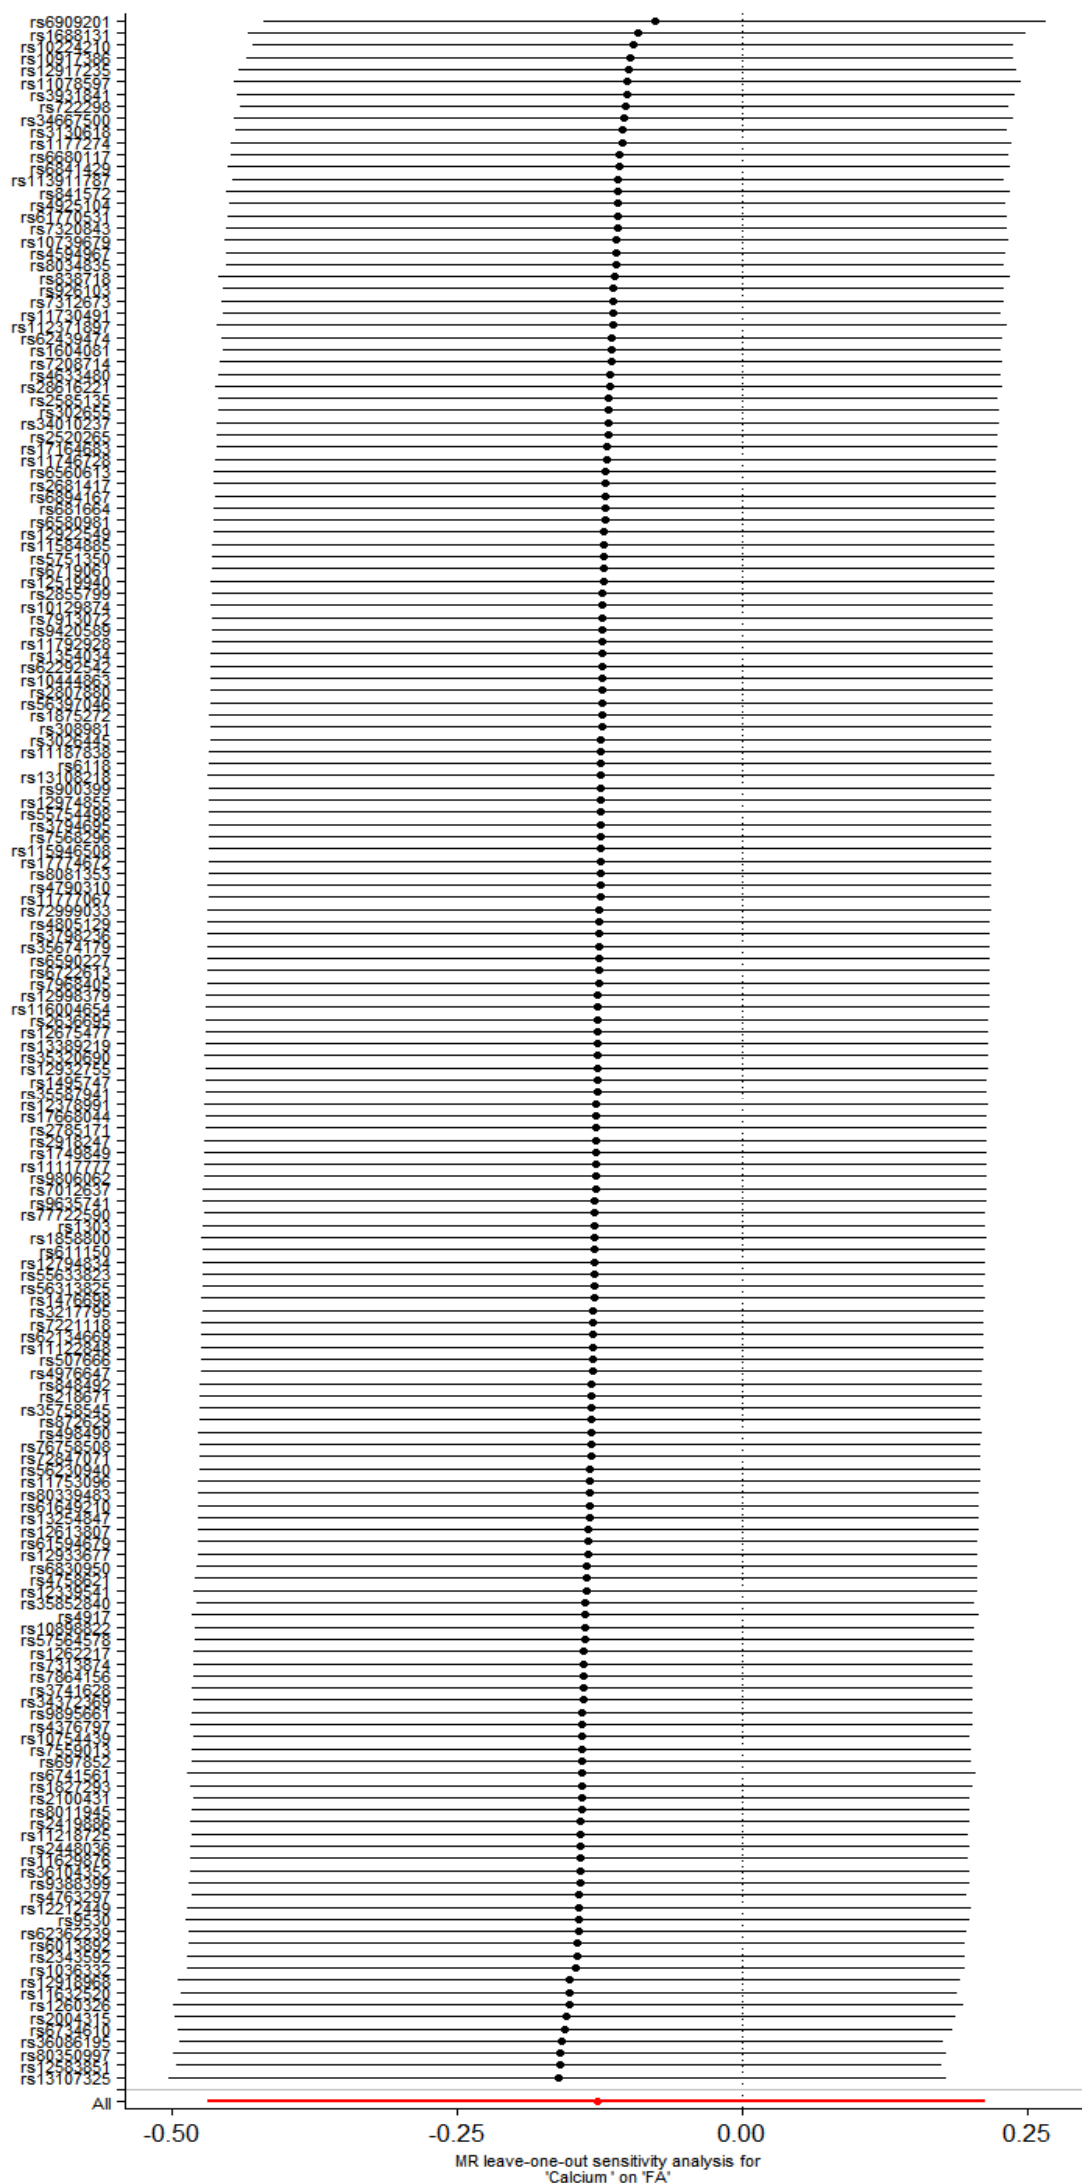

Figure S4.14 Leave-one-out plot of calcium and FA

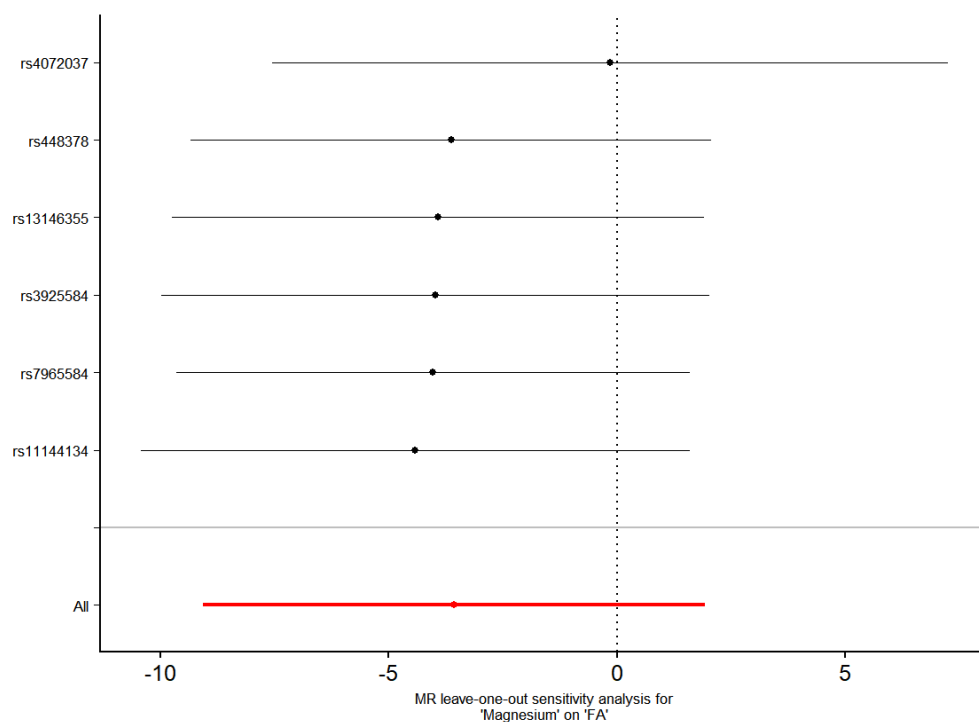

**Figure S4.15** Leave-one-out plot of magnesium and FA

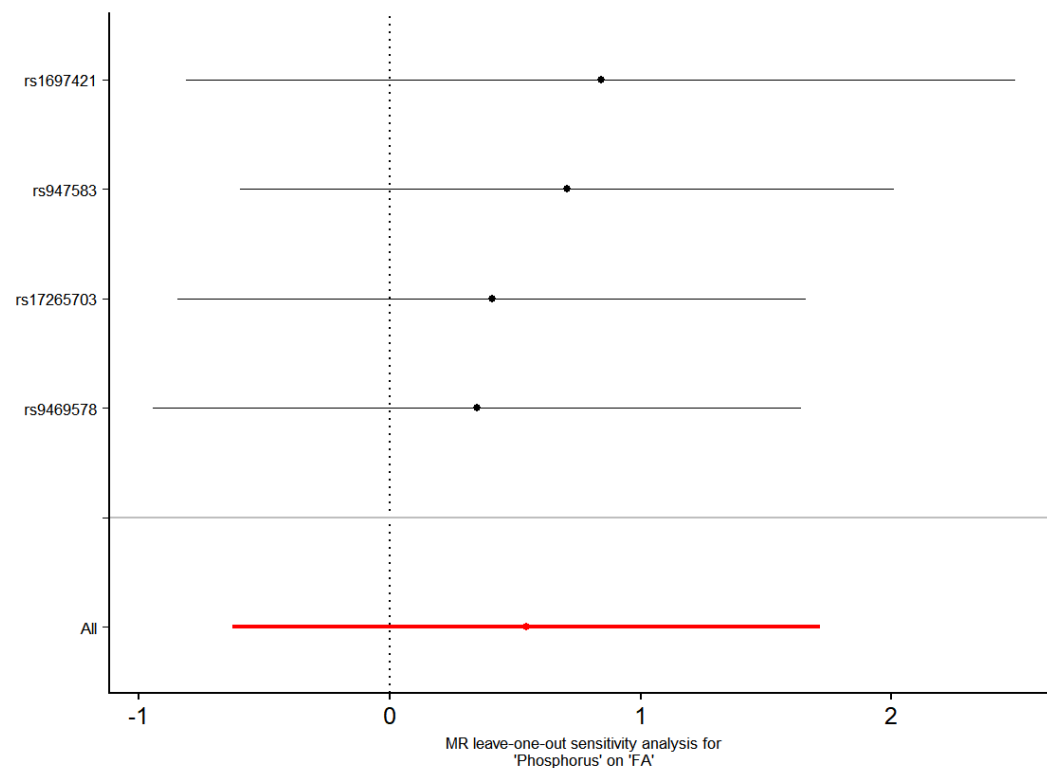

**Figure S4.16** Leave-one-out plot of Phosphorus and FA

**Figure S4** Leave-one-out plots of essential nutrients exposures and FA. The x-axis represents the beta value for the outcome obtained by removing the left SNP from the IVW analysis (i.e., the dots on each solid line). The y-axis represents the SNP removed for each analysis. Each solid line represents the 95% CI for the beta value. The bottom red line is the overall result obtained by all the SNPs of exposure.

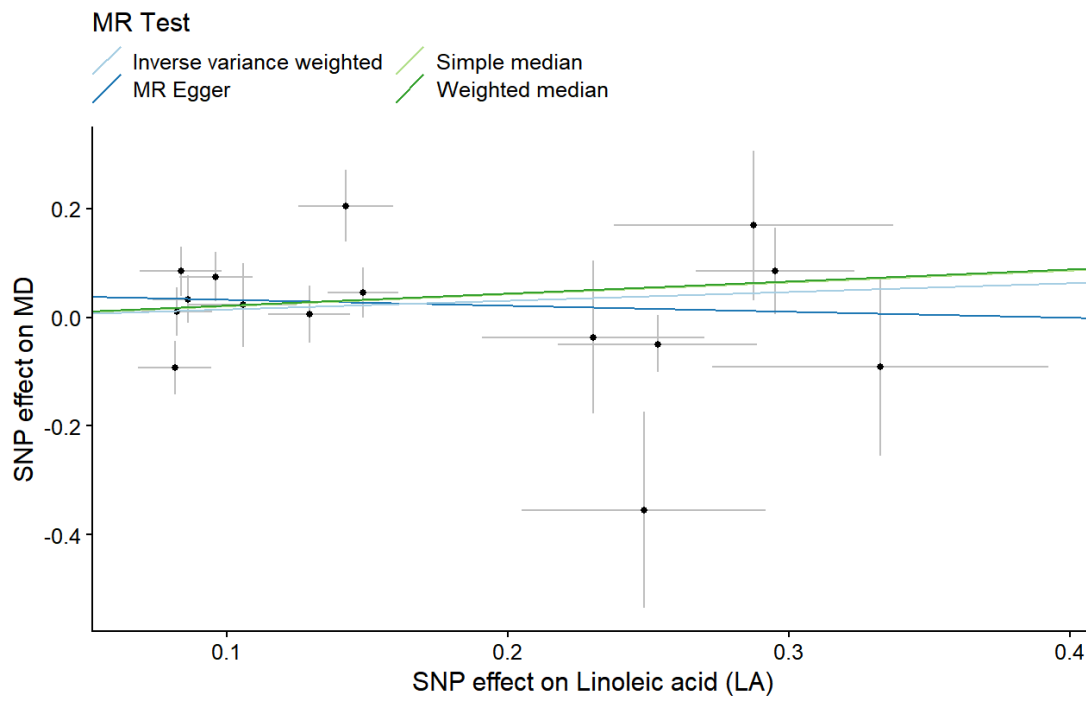

**Figure S5.1 Scatterplot of linolenic acid and MD**

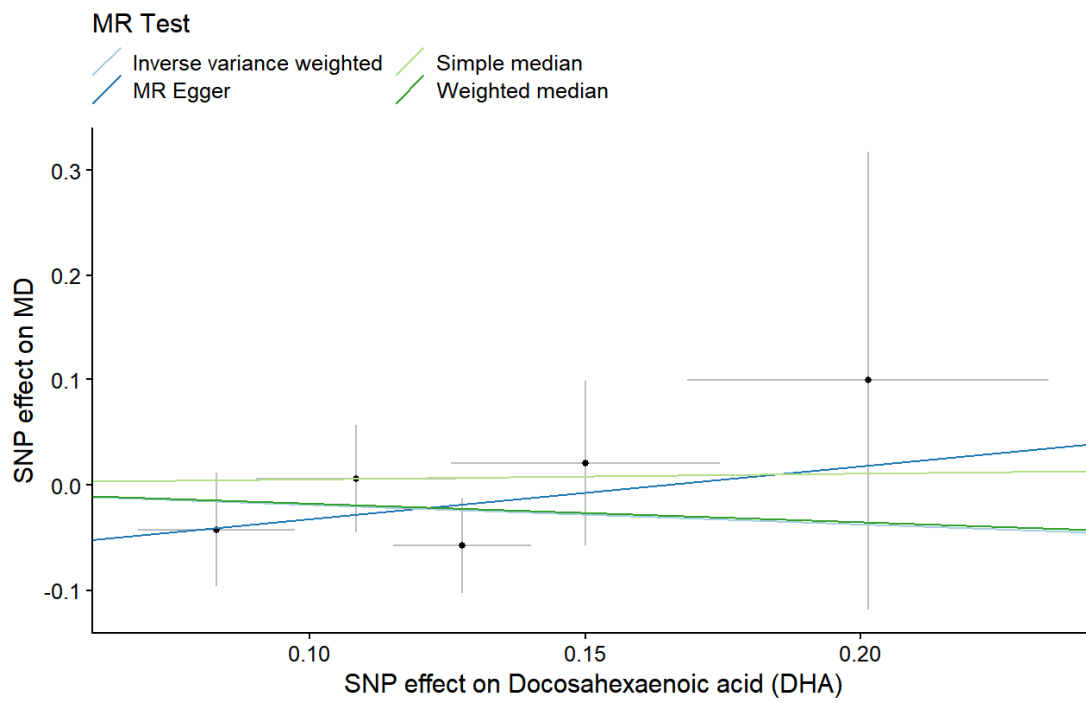

**Figure S5.2 Scatterplot of docosahexaenoic acid (DHA) and MD**



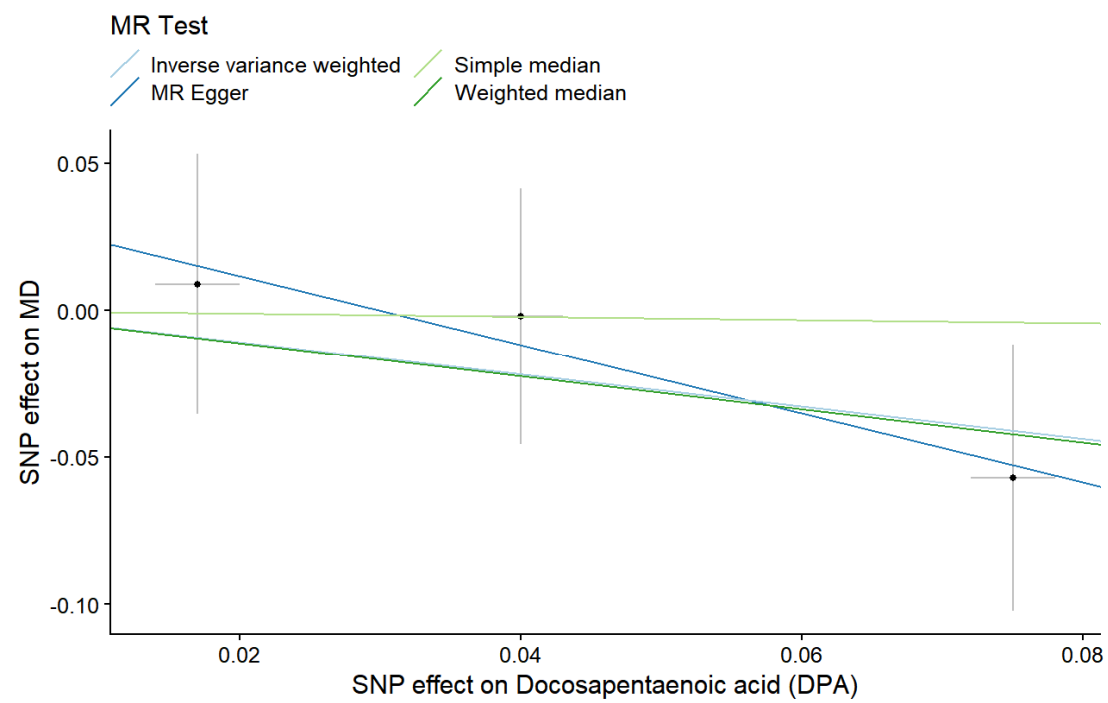

**Figure S5.3 Scatterplot of docosapentaenoic acid (DPA) and MD**

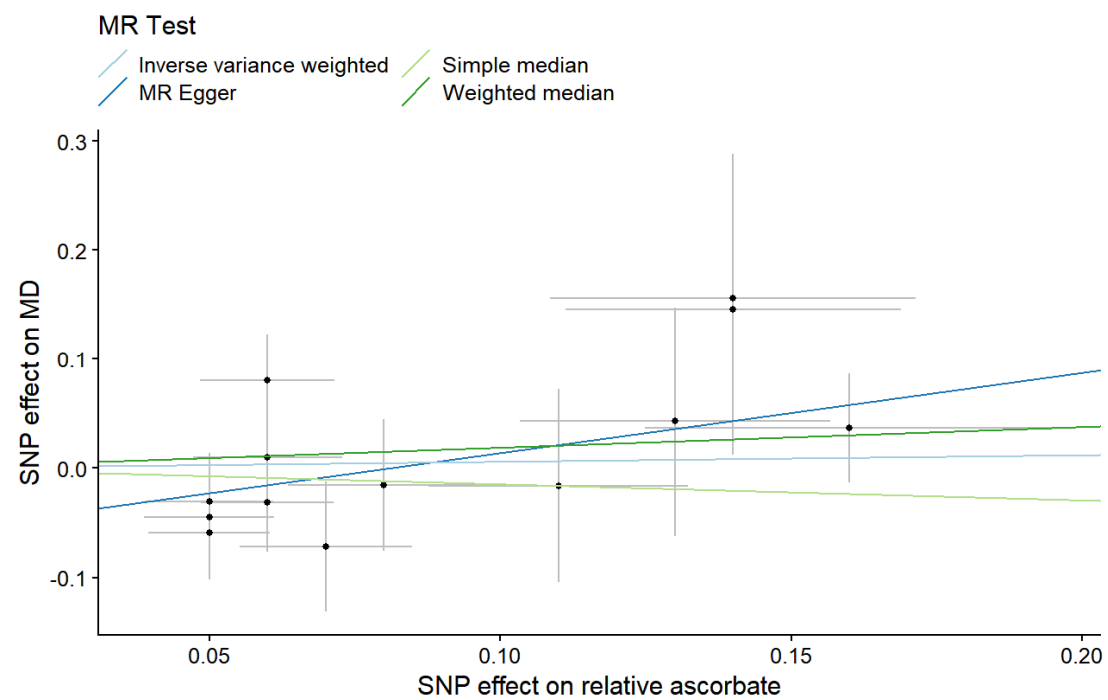

**Figure S5.4 Scatterplot of relative ascorbate and MD**

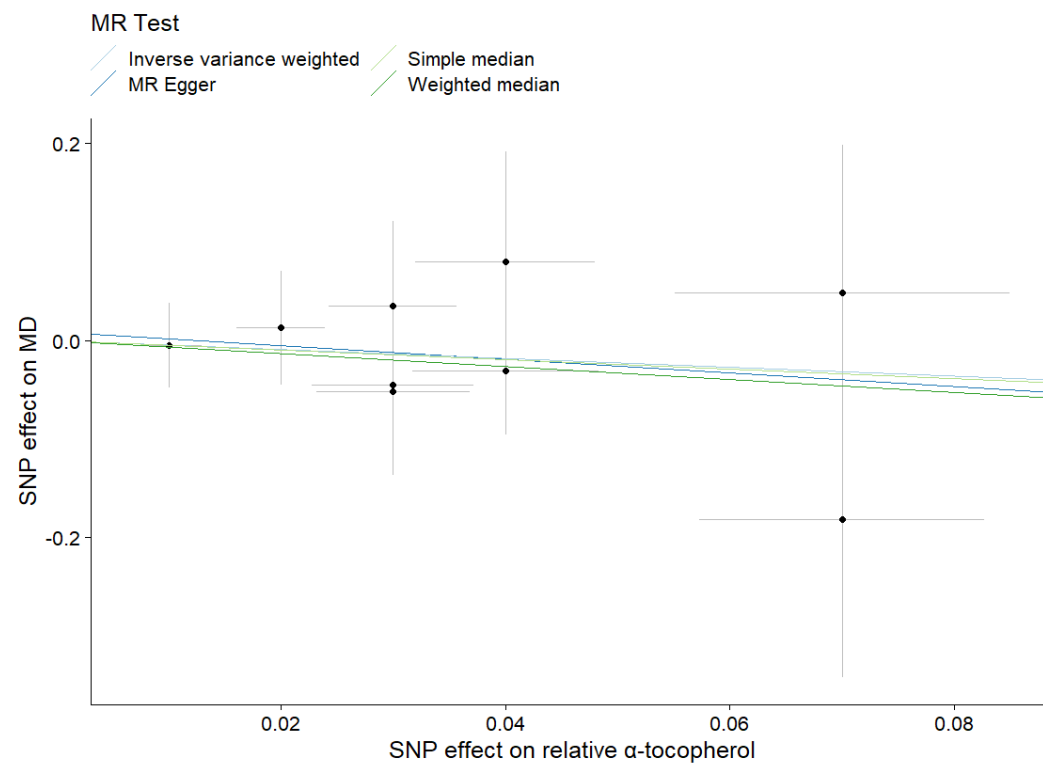

**Figure S5.5 Scatterplot of relative  $\alpha$ -tocopherol and MD**

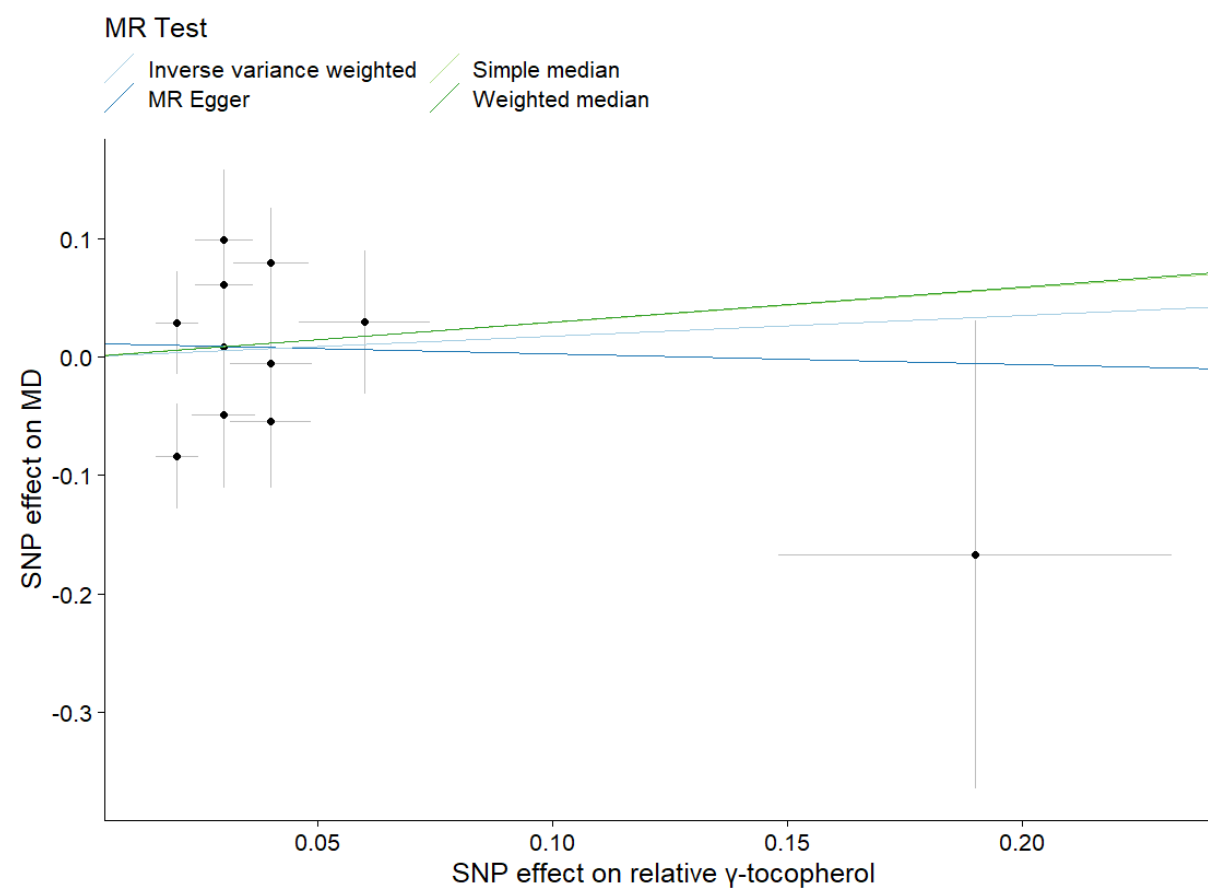

**Figure S5.6 Scatterplot of relative  $\gamma$ -tocopherol and MD**

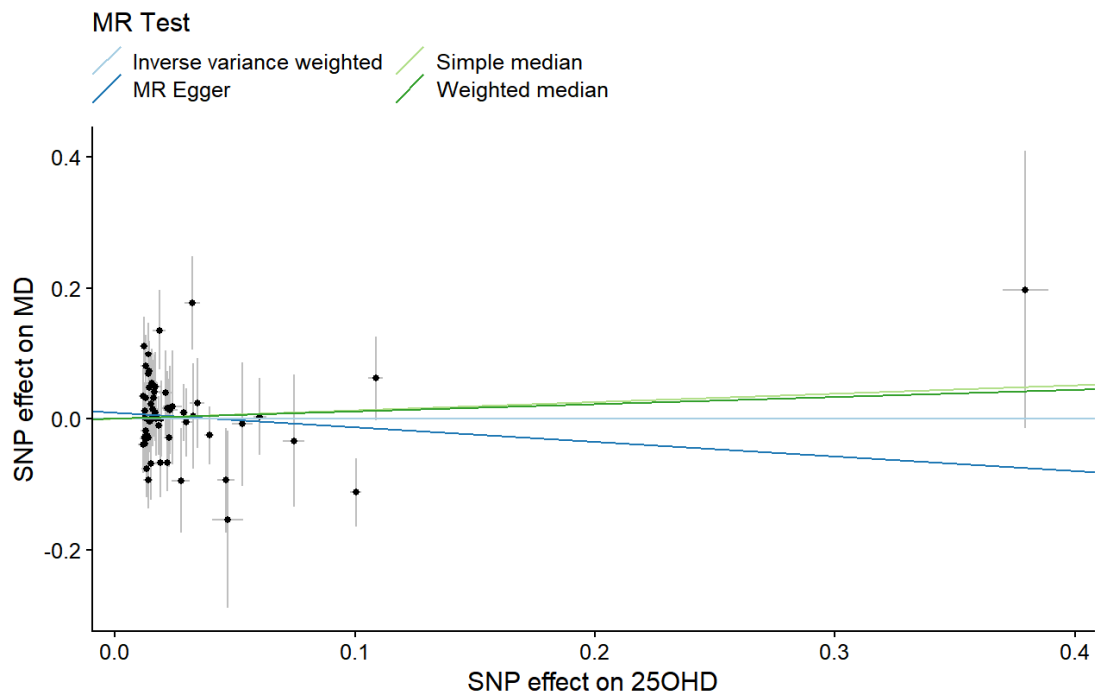

Figure S5.7 Scatterplot of 25OHD and MD

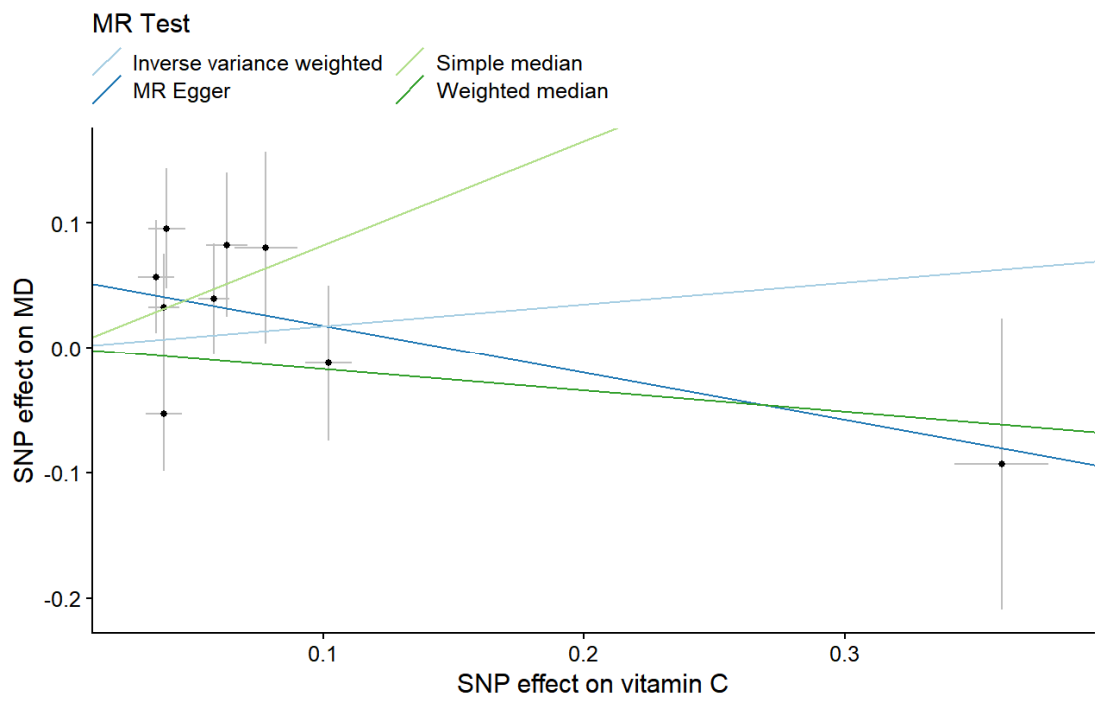

Figure S5.8 Scatterplot of vitamin C and MD

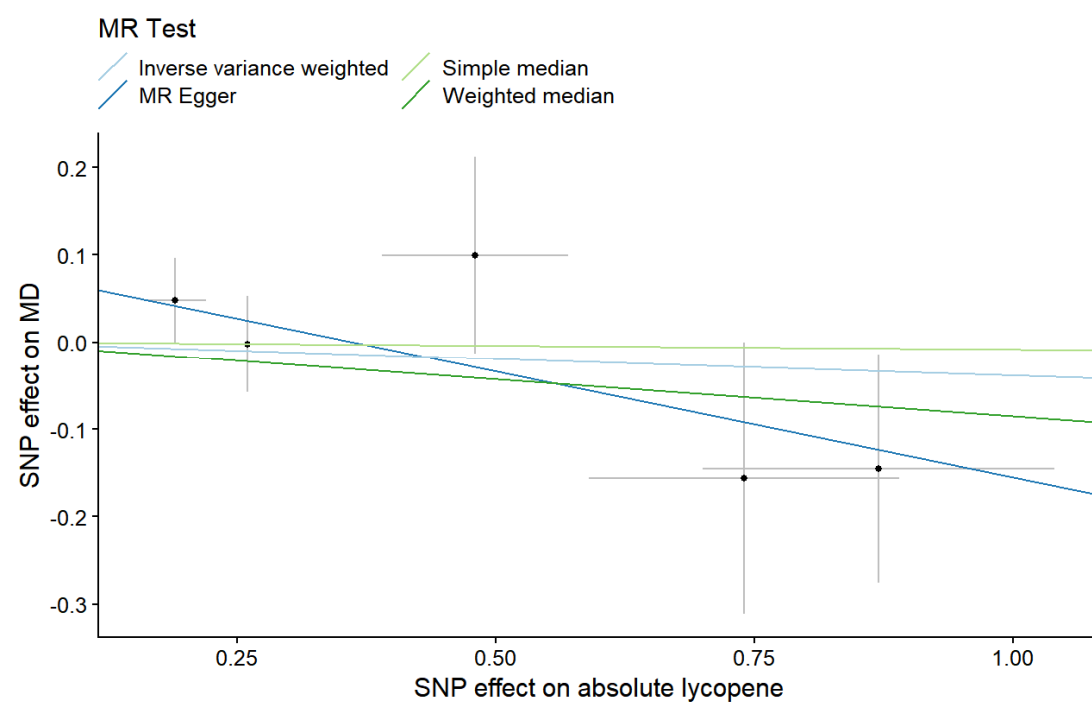

Figure S5.9 Scatterplot of lycopene and MD

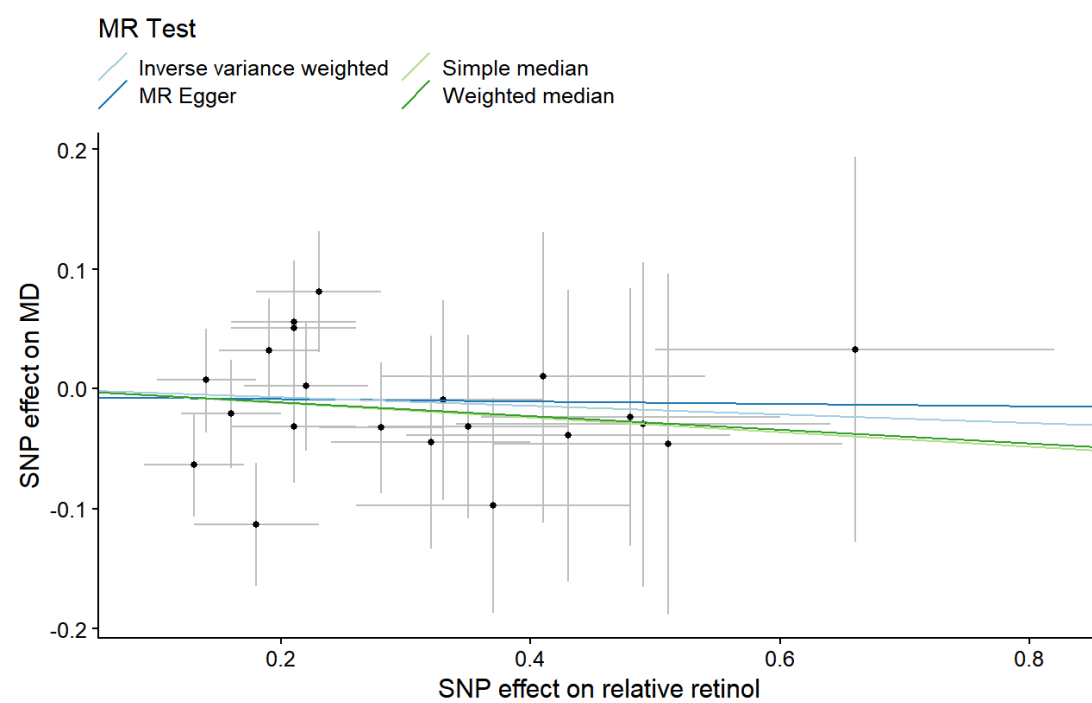

Figure S5.10 Scatterplot of relative retinol and MD

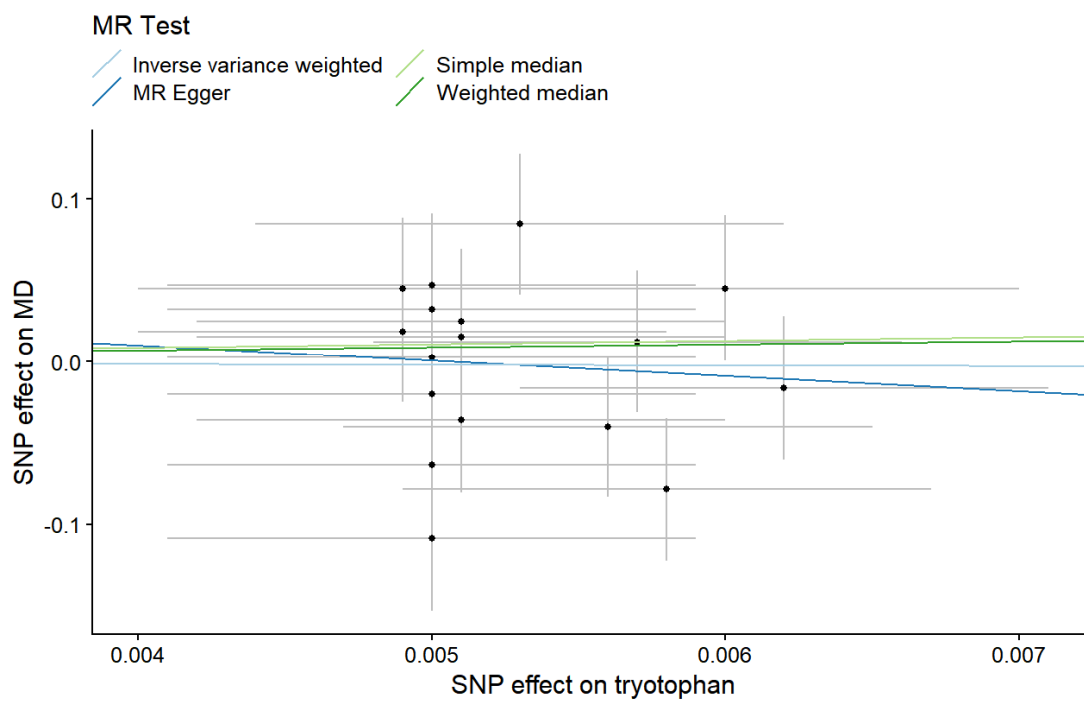

**Figure S5.11 Scatterplot of tryptophan and MD**

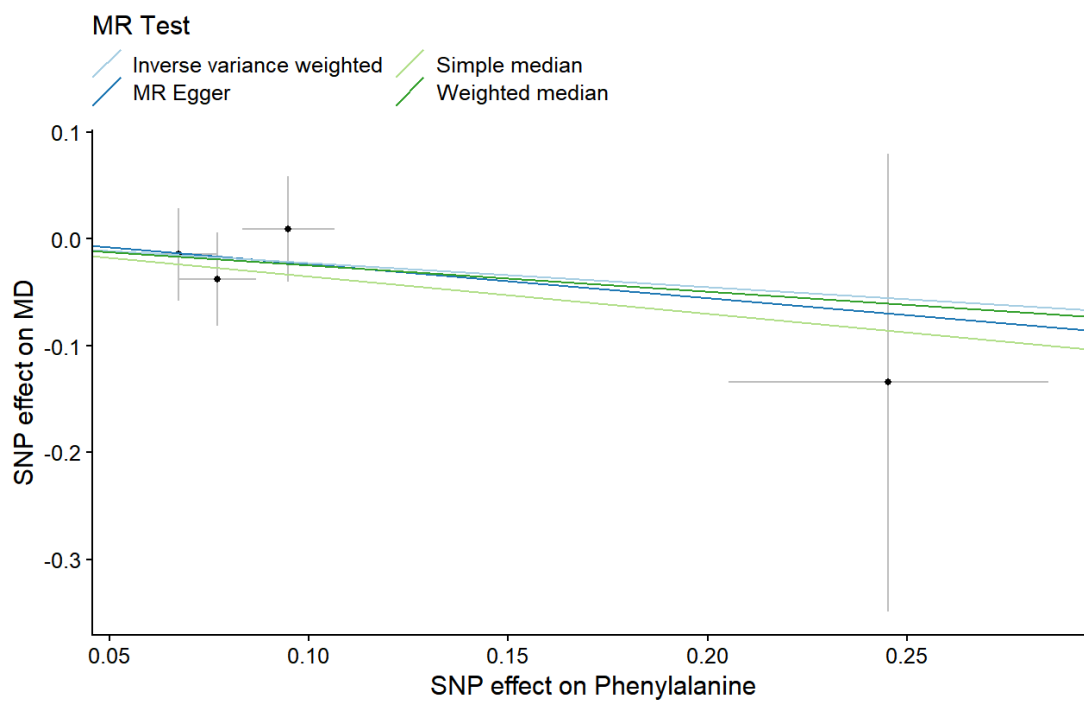

**Figure S5.12 Scatterplot of phenylalanine and MD**

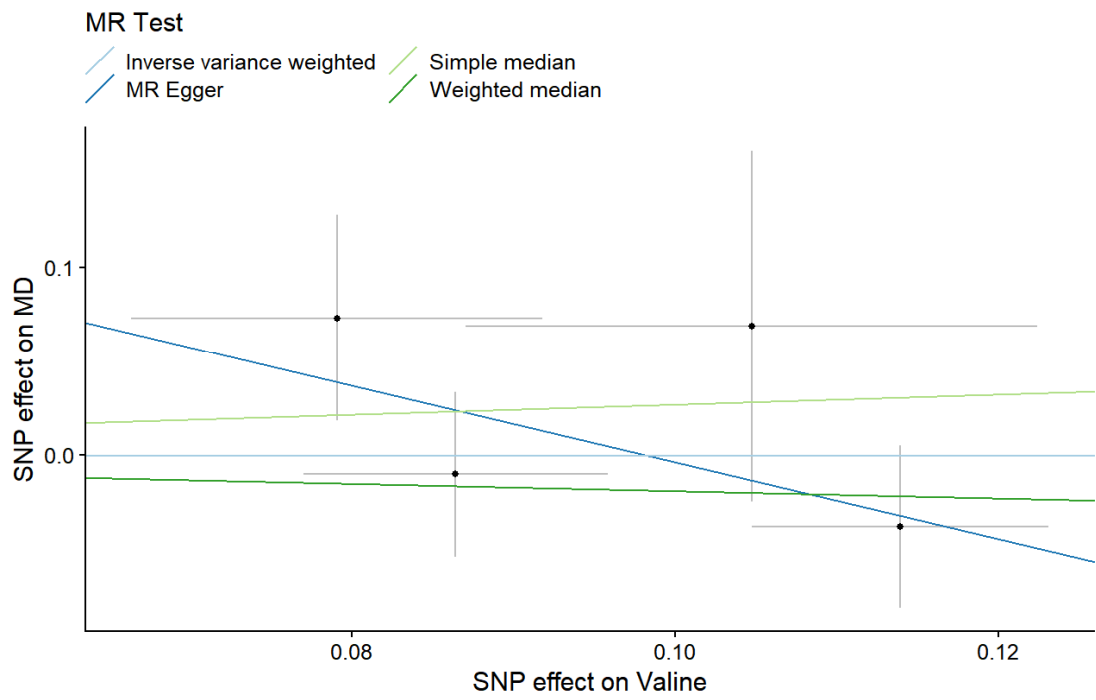

Figure S5.13 Scatterplot of valine and MD

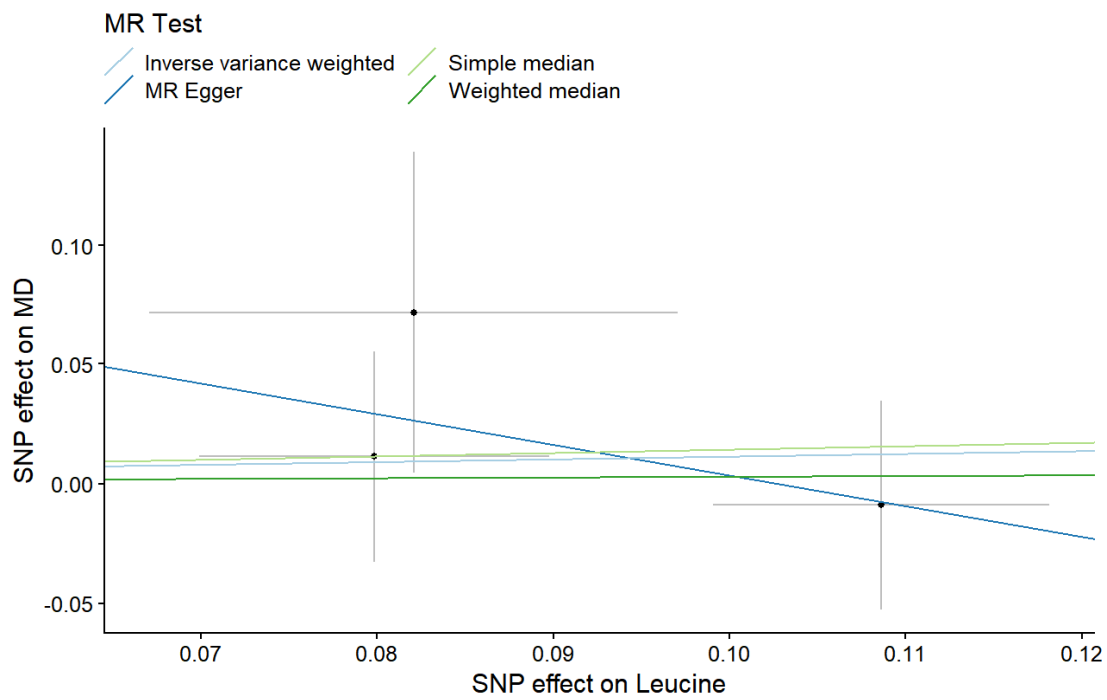

Figure S5.14 Scatterplot of leucine and MD

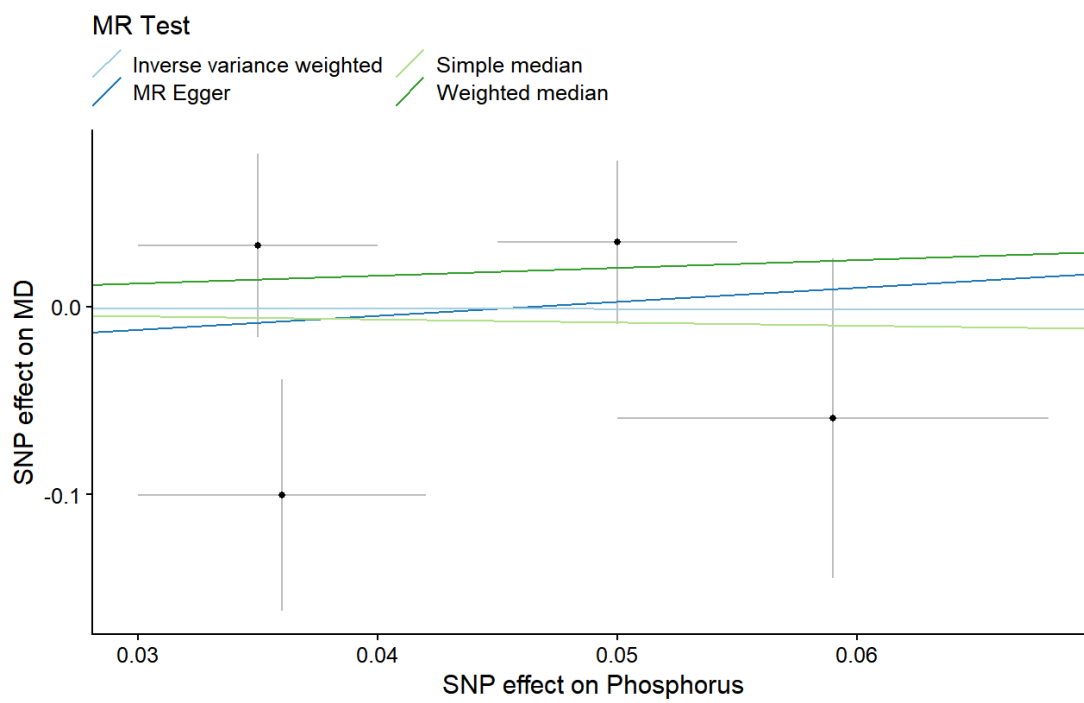

**Figure S5.15 Scatterplot of phosphorus and MD**

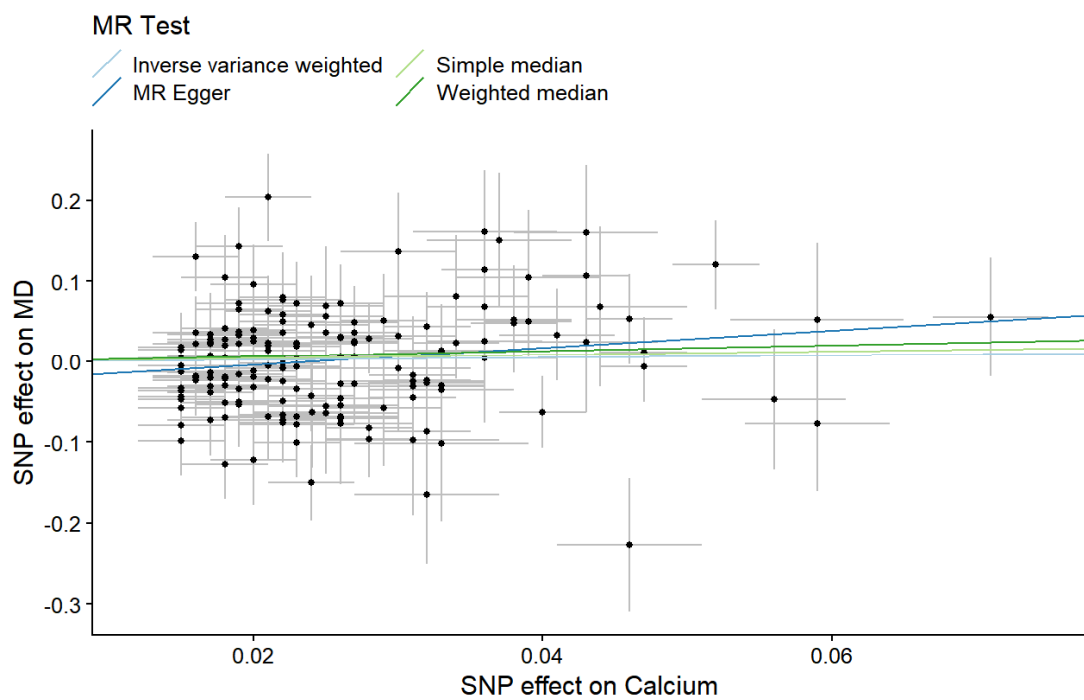

**Figure S5.16 Scatterplot of calcium and MD**

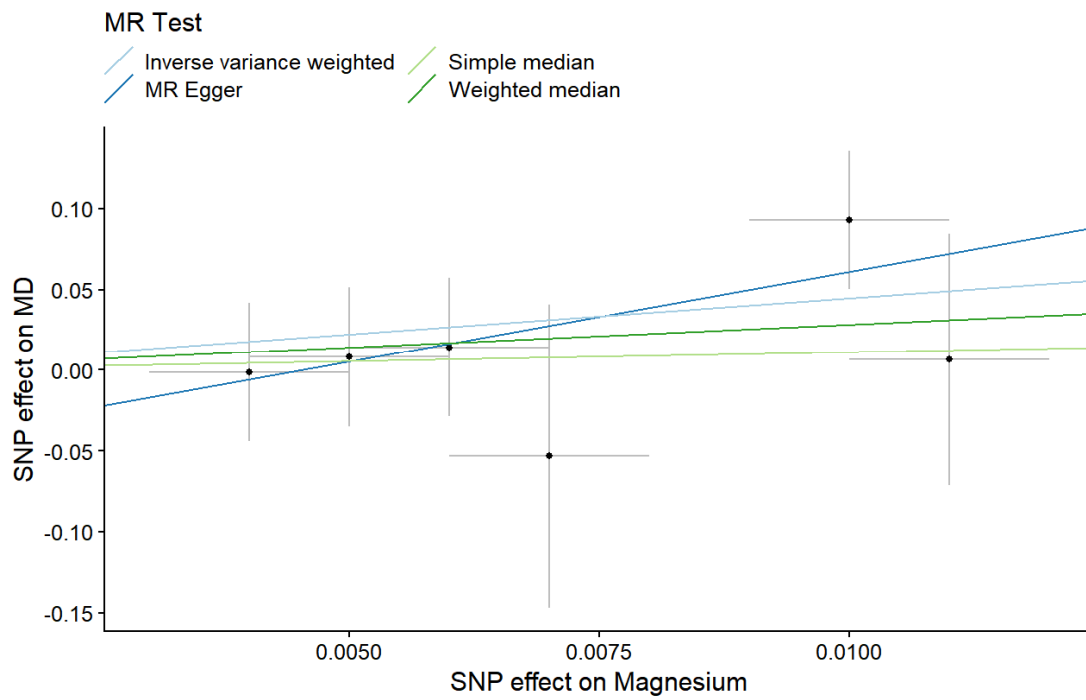

**Figure S5.17 Scatterplot of magnesium and MD**

**Figure S5.** Scatterplots of essential nutrients exposures and MD. The x-axis represents the previously published  $\beta$ -estimate for the association between each SNP and essential nutrients. The y-axis represents the  $\beta$ -estimate for the association between each SNP and risk of cerebral hemorrhage. The slope of each line corresponds to the estimated MR effect per method.

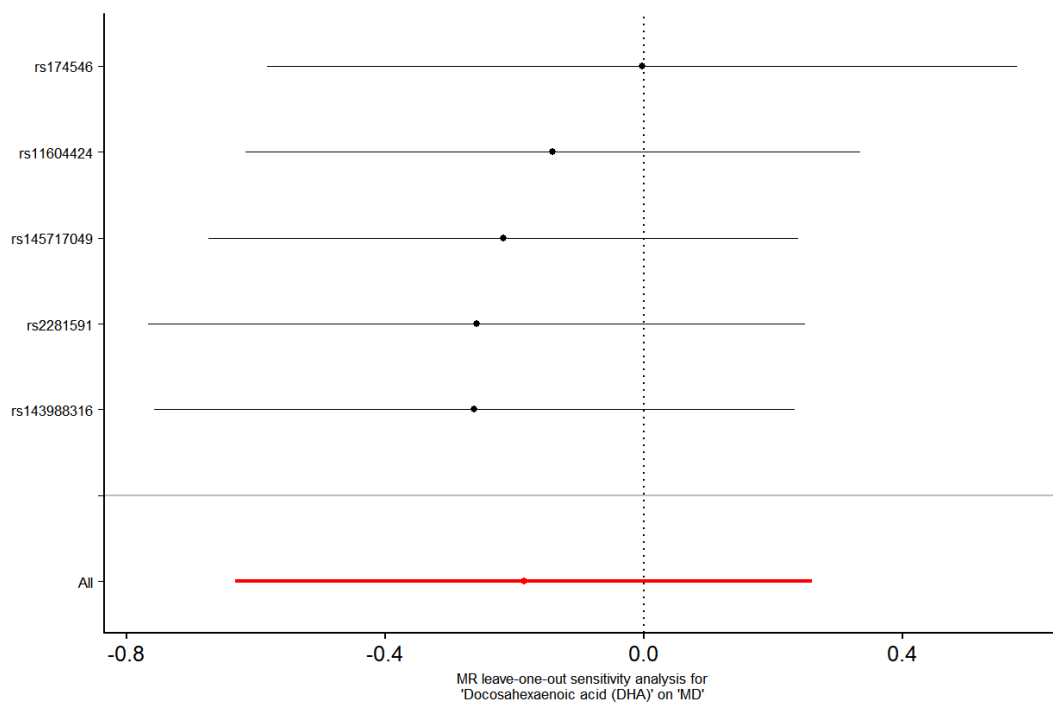

**Figure S6.1 Leave-one-out plot of docosahexaenoic acid (DHA) and MD**



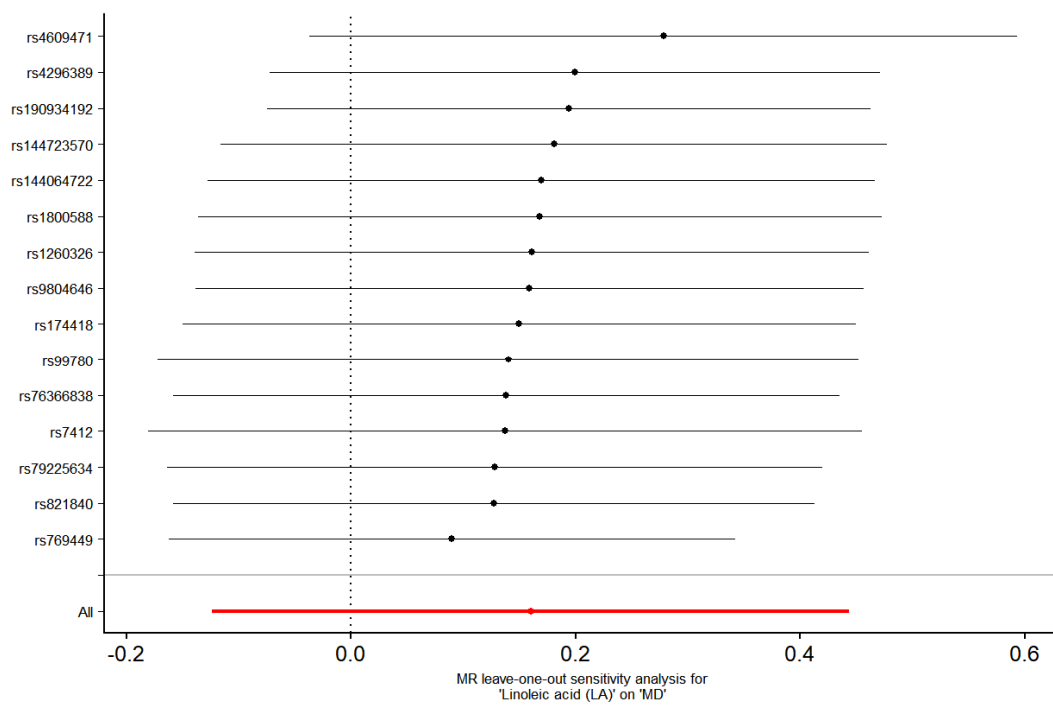

**Figure S6.2 Leave-one-out plot of linolenic acid(LA) and MD**

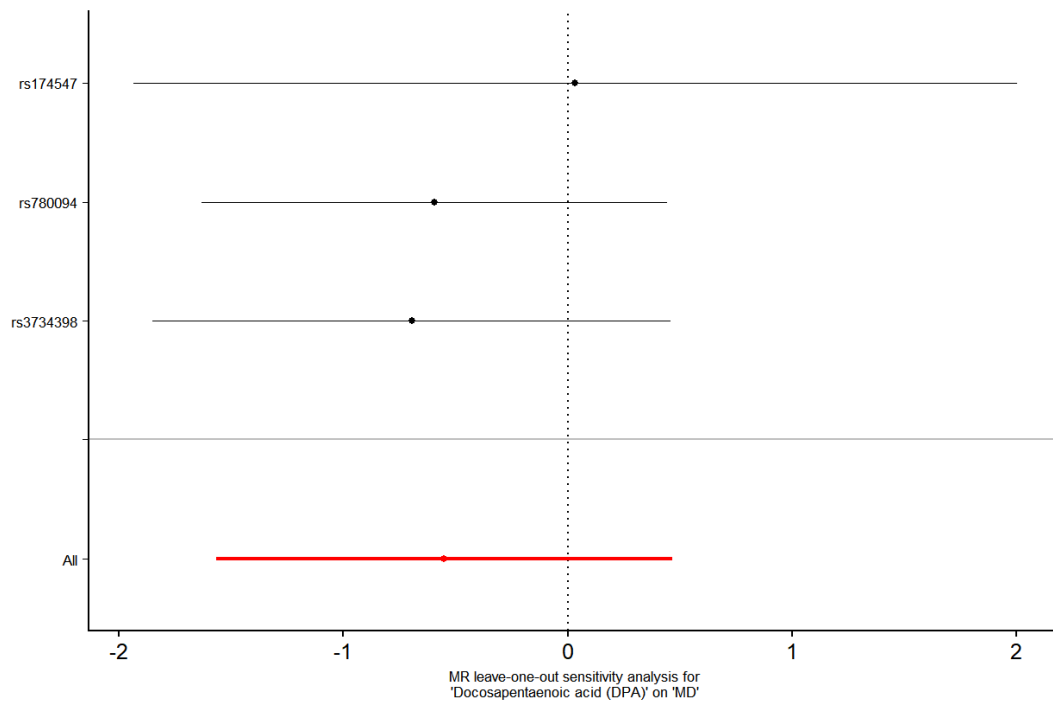

**Figure S6.3 Leave-one-out plot of docosapentaenoic acid (DPA) and MD**

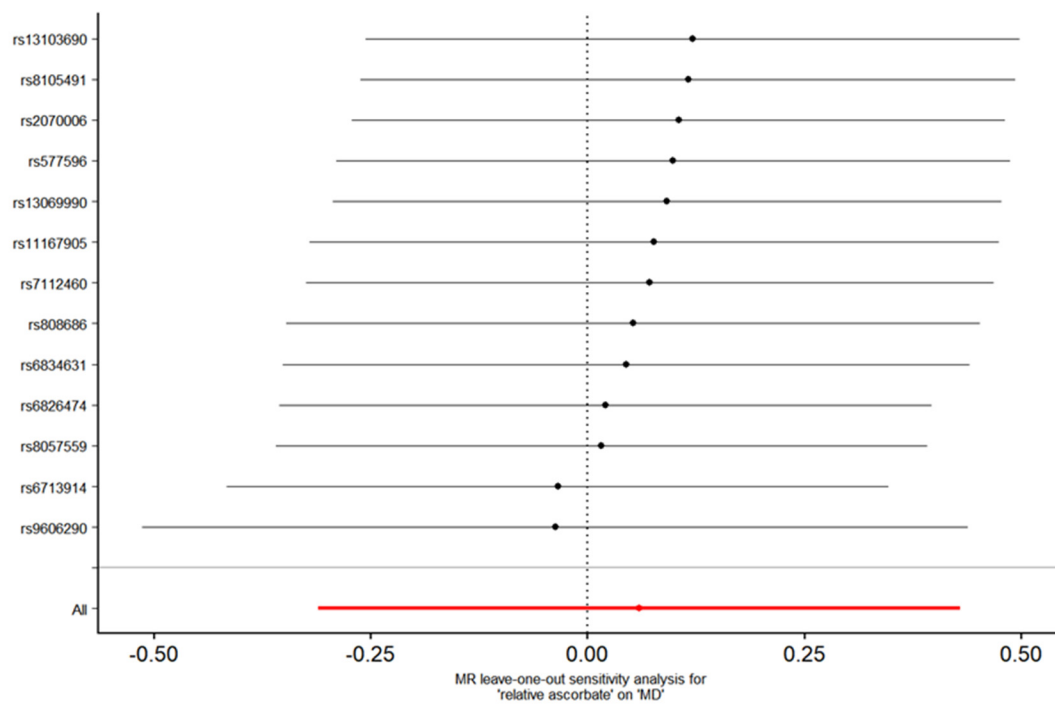

**Figure S6.4** Leave-one-out plot of relative ascorbate and MD

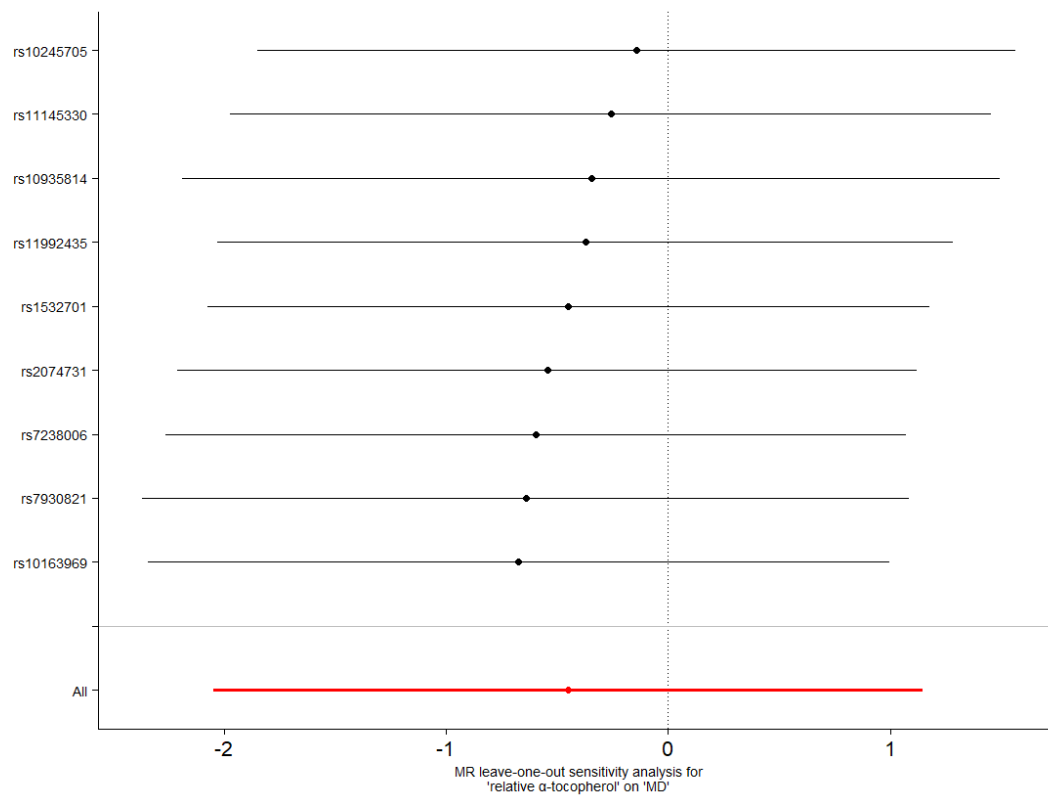

**Figure S6.5** Leave-one-out plot of relative  $\alpha$ -tocopherol and MD

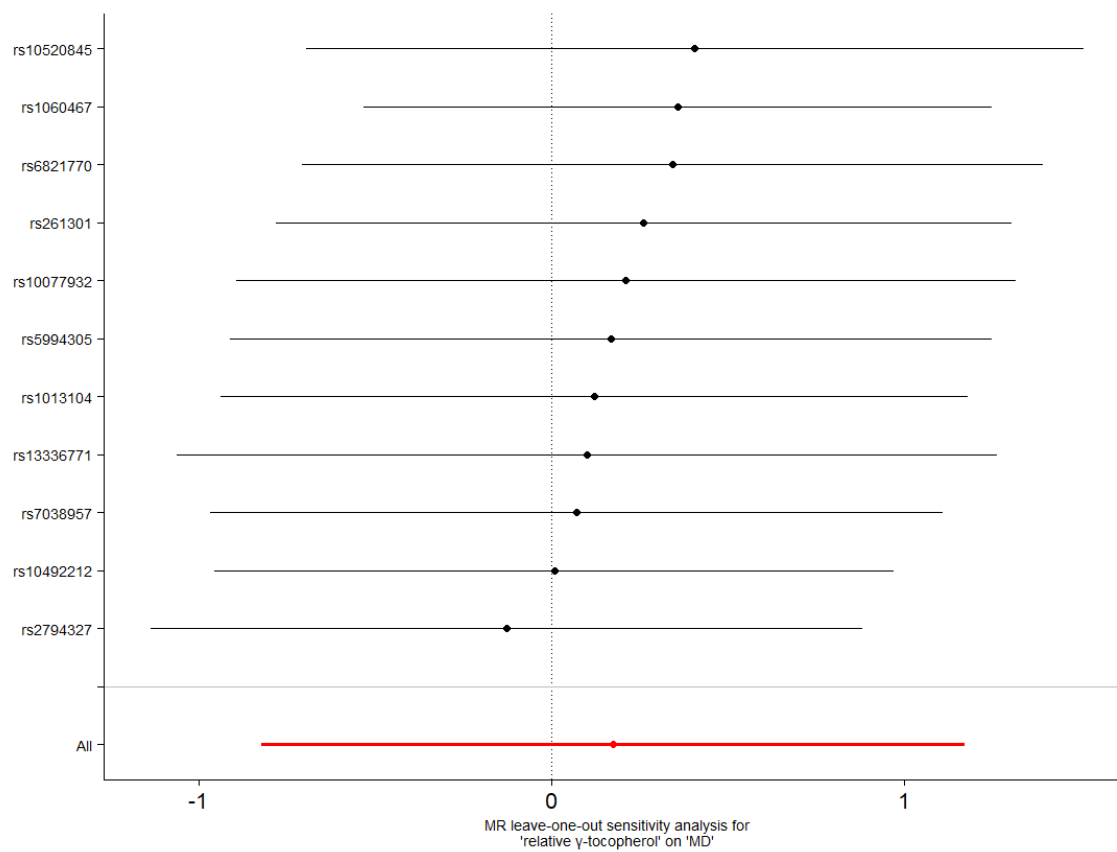

**Figure S6.6** Leave-one-out plot of relative  $\gamma$  -tocopherol and MD

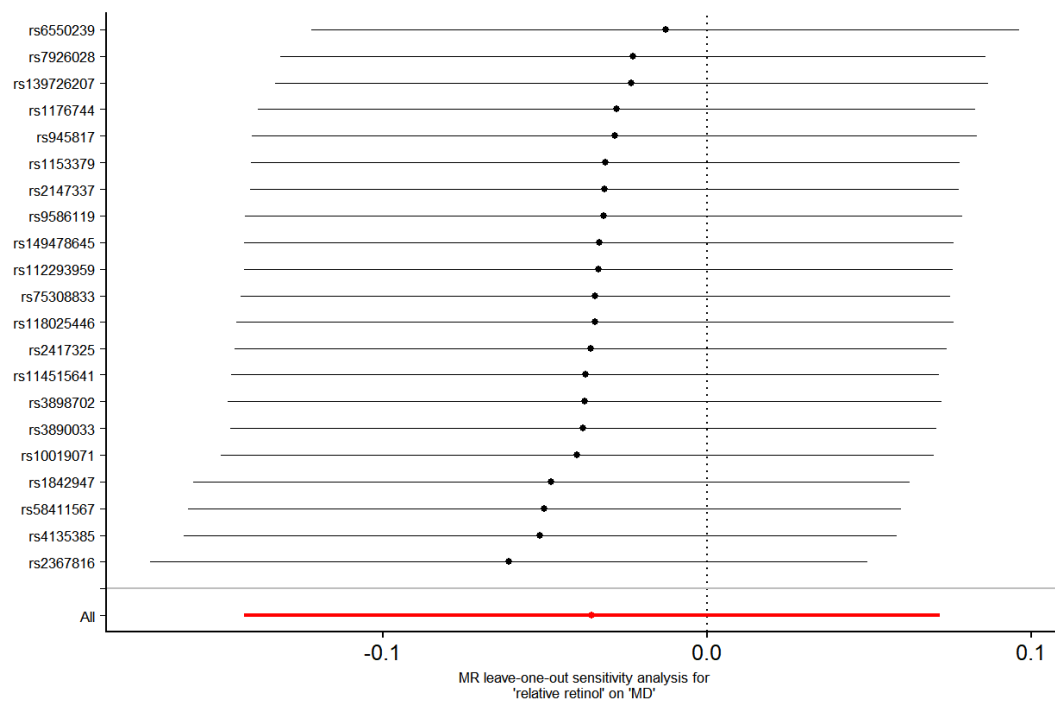

**Figure S6.7** Leave-one-out plot of relative retinol and MD

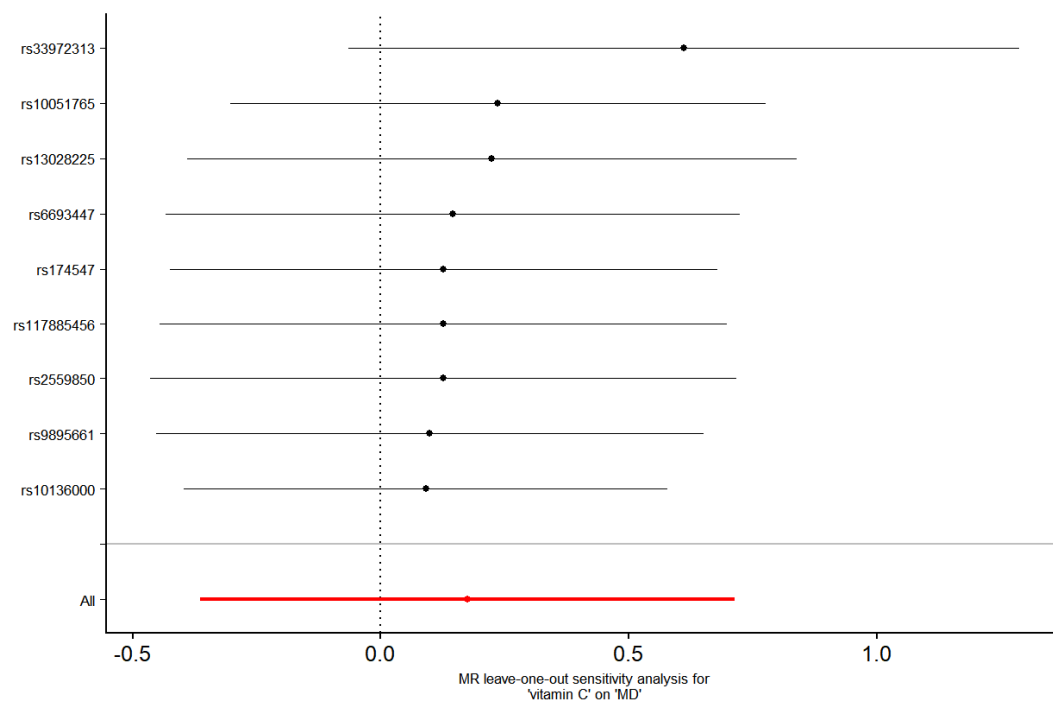

**Figure S6.8 Leave-one-out plot of vitamin C and MD**

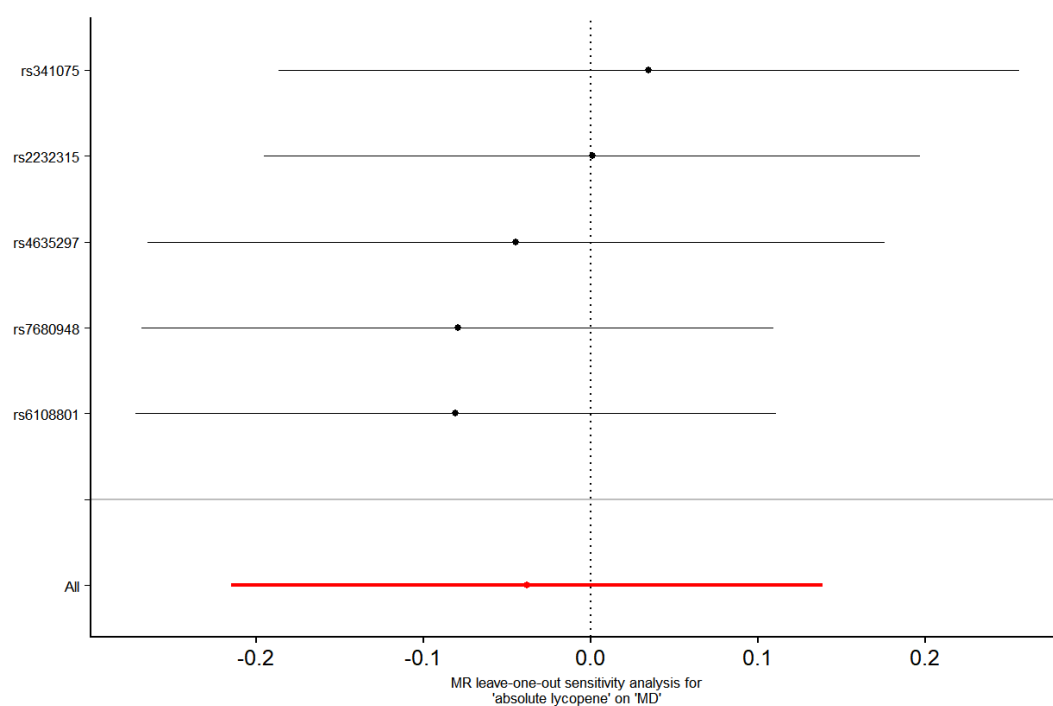

**Figure S6.9 Leave-one-out plot of absolute lycopene and MD**

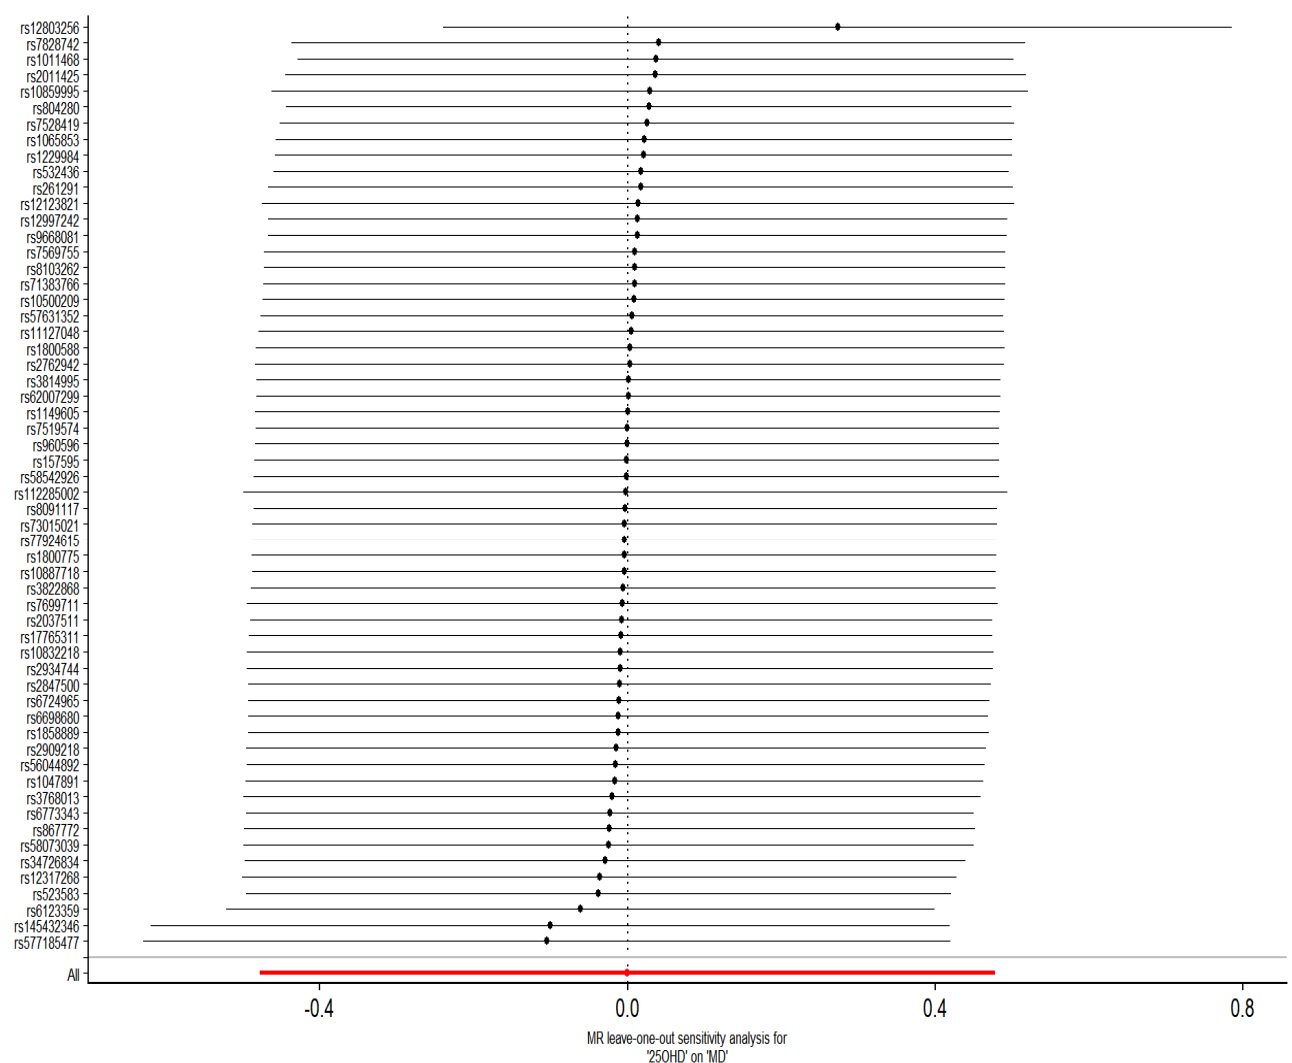

Figure S6.10 Leave-one-out plot of 25OHD and MD

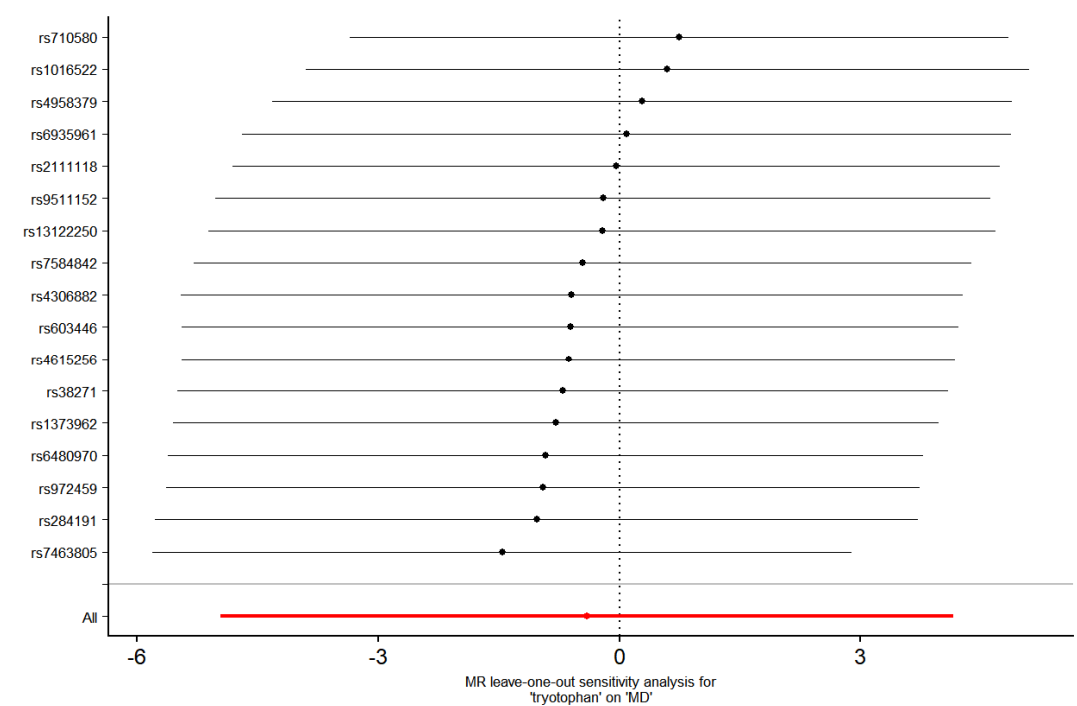

Figure S6.11 Leave-one-out plot of tryptophan and MD

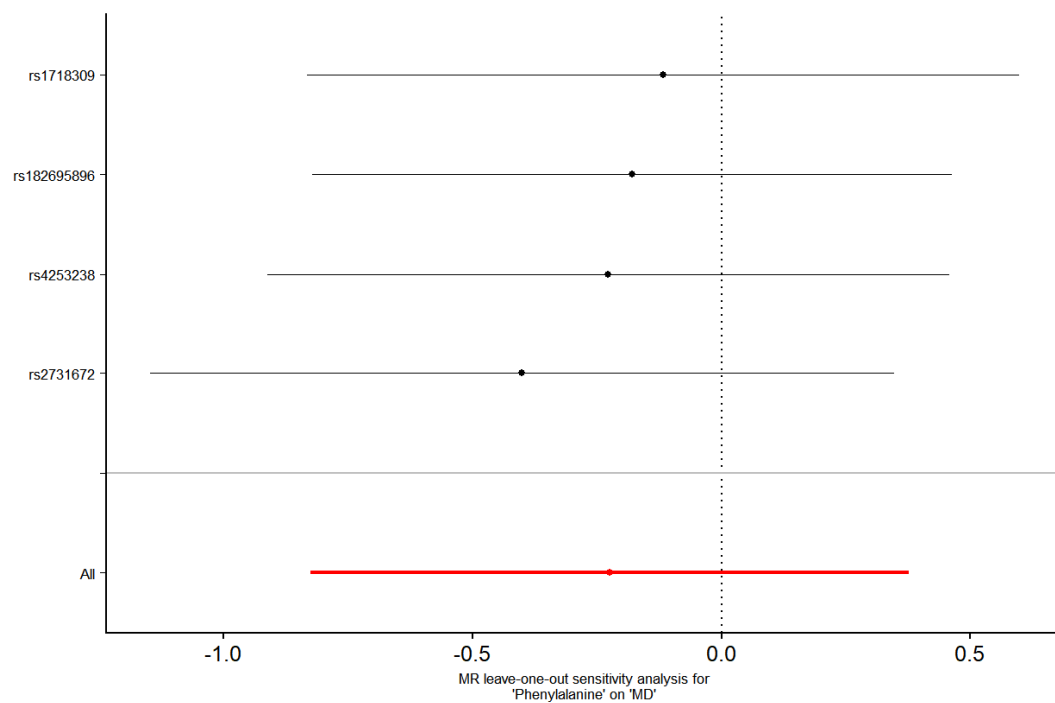

**Figure S6.12** Leave-one-out plot of phenylalanine and MD

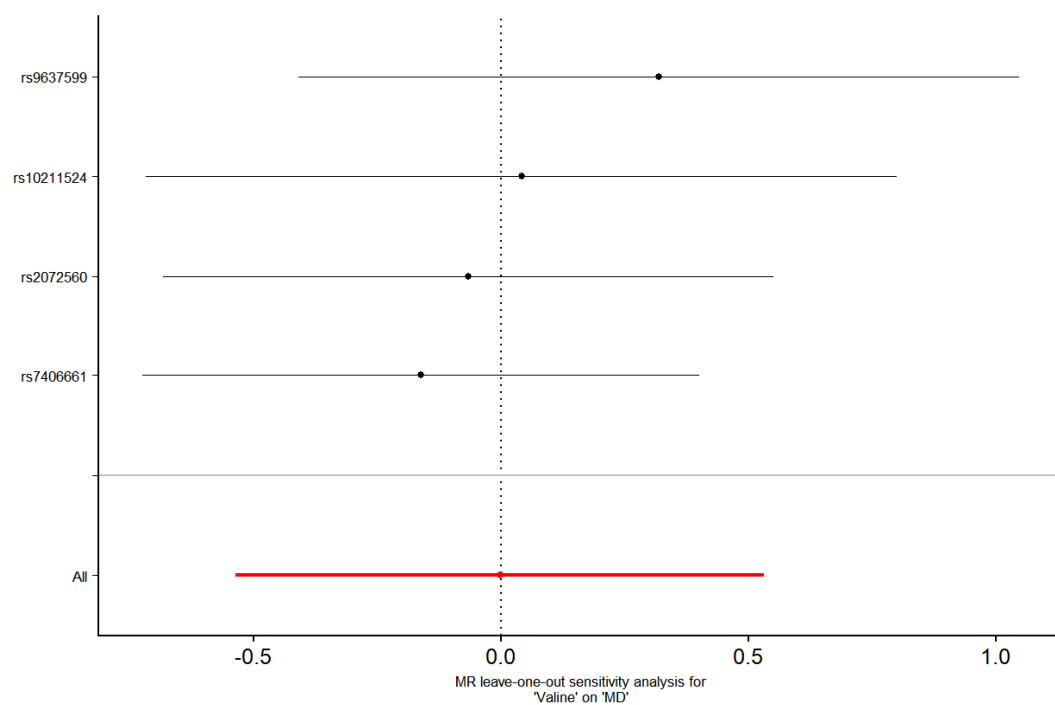

**Figure S6.13** Leave-one-out plot of valine and MD

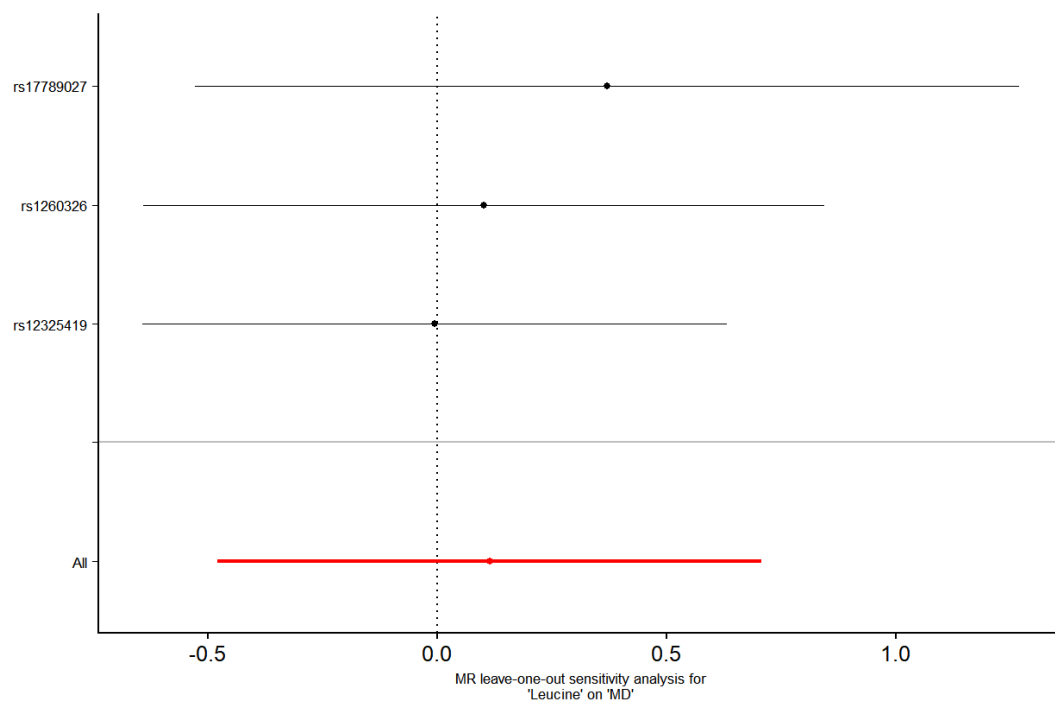

**Figure S6.14** Leave-one-out plot of leucine and MD

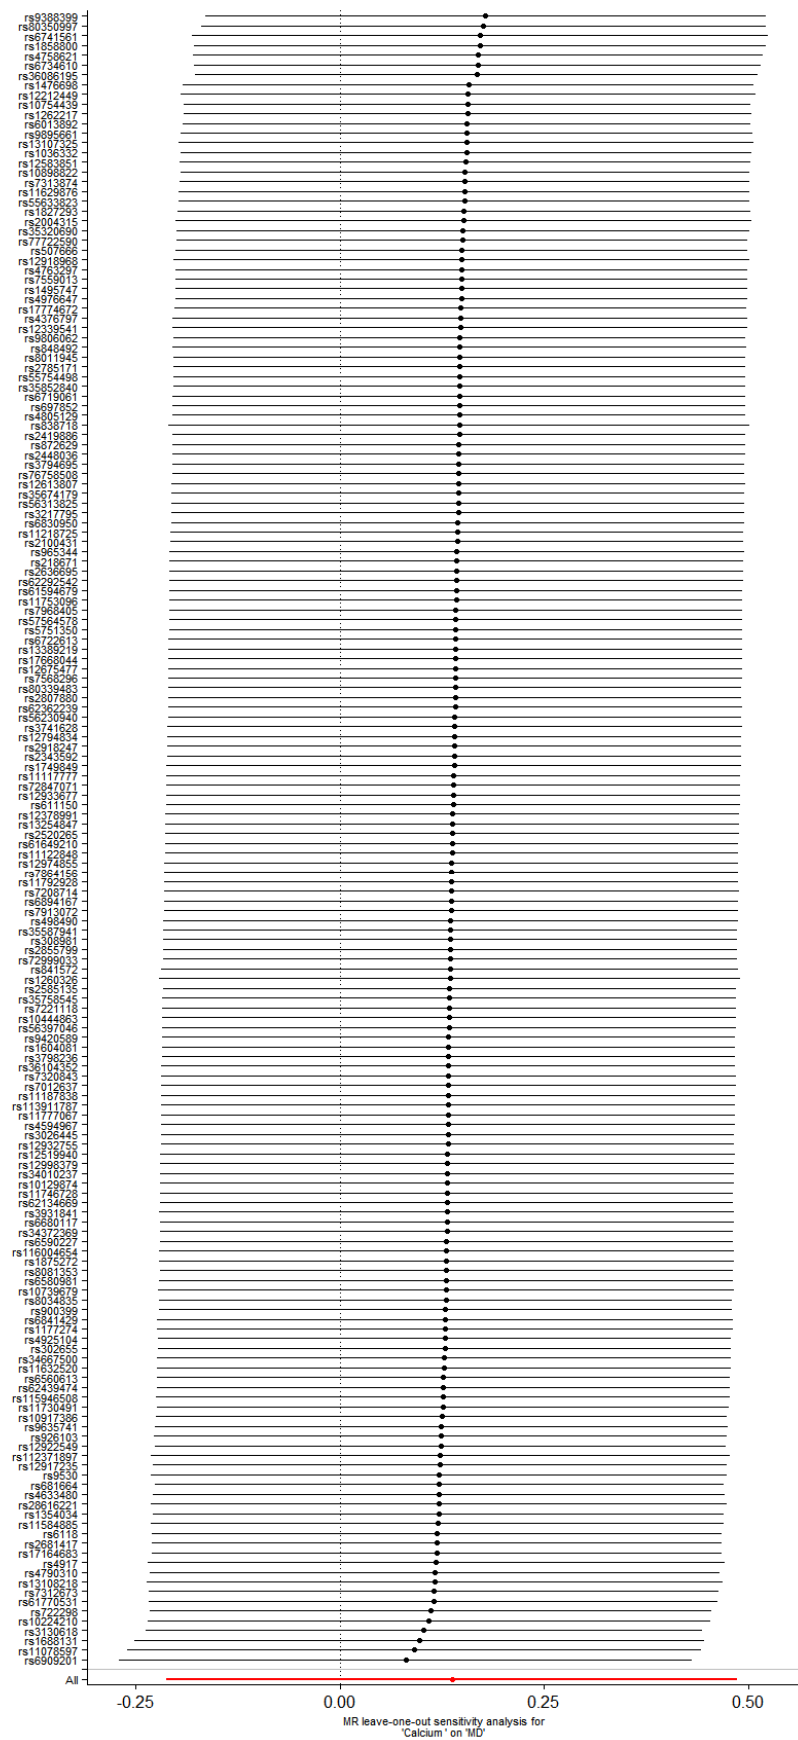

Figure S6.15 Leave-one-out plot of calcium and MD



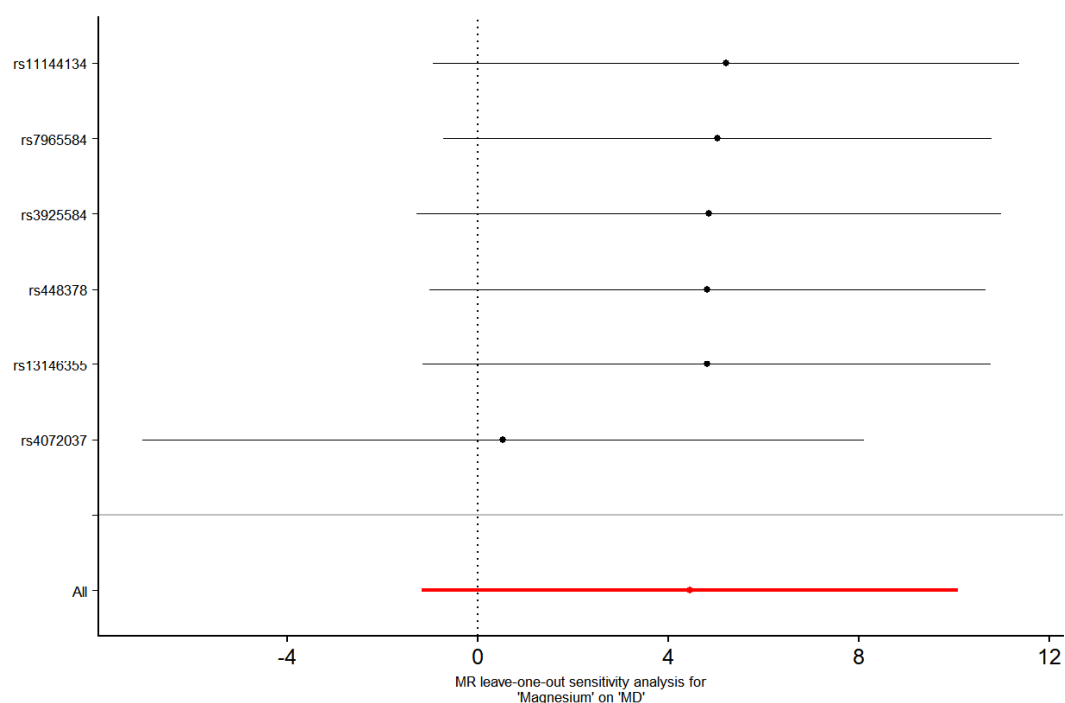

**Figure S6.16** Leave-one-out plot of magnesium and MD

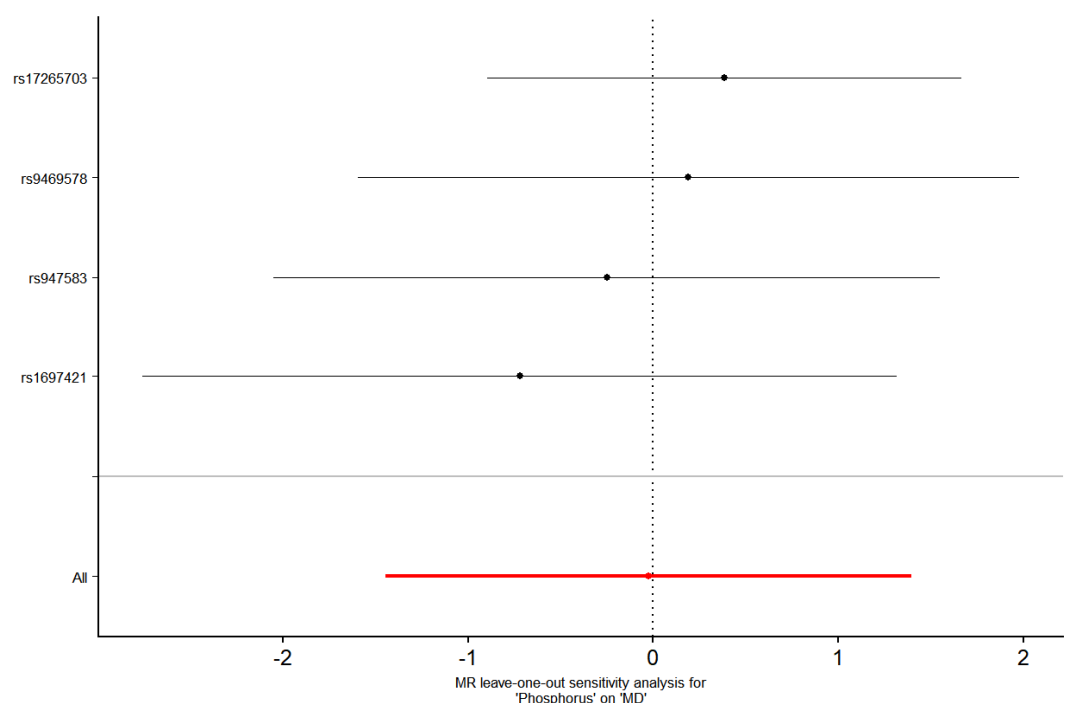

**Figure S6.17** Leave-one-out plot of phosphorus and MD

**Figure S6** Leave-one-out plots of essential nutrients exposures and MD. The x-axis represents the beta value for the outcome obtained by removing the left SNP from the IVW analysis (i.e., the dots on each solid line). The y-axis represents the SNP removed for each analysis. Each solid line represents the 95% CI for the beta value. The bottom red line is the overall result obtained by all the SNPs of exposure.
